# Supplementary material for: Reference-quality bat genomes illuminate adaptations to viral tolerance and disease resistance
Source: Research Square preprint supplement (doi:10.21203/rs.3.rs-2557682/v1), 2023-02-14
Supplement: Supplementary file 1 [file 7bffaf3cd2dc04ab0cf9da4f.xlsx]

## Sheet: _listAllTables
	table_number	Description
	SuppTable_1	Supplementary Table 1. Data of rodents and bats screened for viruses using Metagenomics or High-throughput sequencing approaches. Bat records were split into families.
	SuppTable_2	Supplementary Table 2. Information of new bat genomes. Museum ID, sampling locality, genome assembly statistics and BUSCO values.
	SuppTable_3	Supplementary Table 3. Accession numbers and annotation statistics of genomes from 50 bats included in the phylogenomics analysis.
	SuppTable_4	Supplementary Table 4. Fossil calibrations used to estimate divergence times of phylogeny with 50 bats or 115 mammals as reported in Teeling et al. (2005; PMID15681385) and Foley et al. (2016; PMC4920340).
	SuppTable_5	Supplementary Table 5. Accession numbers and annotation statistics of genomes from 115 mammals included in our selection screen.
	SuppTable_6	Supplementary Table 6. Genes and branches with a statistically significant selection signal in a screen including 115 mammals.
	SuppTable_7	Supplementary Table 7. Enrichment results from gProfiler using as input list of genes under selection in at least one branch per group. Screen was performed with 115 mammals.
	SuppTable_8	Supplementary Table 8. Branch lengths and number of genes under selection per branch for the "Immune System Process" GO term (screen was performed with 115 mammals).
	SuppTable_9	Supplementary Table 9. Model selection for the correction of branch length vs. number of genes under selection.
	SuppTable_10	Supplementary Table 10. Raw data of the percentage of VSV-GFP positive HEK293 cells transfected with ISG15.
	SuppTable_11	Supplementary Table 11. Raw data of the viral load in HEK293 cells (mean fluorescence intensity) transfected with ISG15s.
	SuppTable_12	Supplementary Table 12. Raw data of cell growth measurements of HEK293 cells transfected with ISG15s, either uninfected or VSV-GFP infected (values are relative to the control).
	SuppTable_13	Supplementary Table 13. Raw data of the CCK8 assay to measure ATP turnover as a proxy for viability of HEK-293 cells that were stably transfected with ISG15 constructs and are VSV-infected or uninfected.
	SuppTable_14	Supplementary Table 14. Raw data of quantifying viral plaques (pfu/mL) for the 10-7 dilution of A549 lysate cells transfected with ISG15 and infected with IAV.
	SuppTable_15	Supplementary Table 15. Raw data of the percentages of HEK293-ANPEP cells transfected with ISG15s, infected with HCoV-229E, and stained for viral N-protein.
	SuppTable_16	Supplementary Table 16. Raw data of the viral load in HEK293-ANPEP cells transfected with ISG15s, infected with HCoV-229E and stained for viral N-protein.
	SuppTable_17	Supplementary Table 17. Raw data of tissue culture infectious dose 50 (TCID50) assay for A549-ACE2 cells transfected with ISG15 and infected with SARS-CoV2.
	SuppTable_18	Supplementary Table 18.Raw data of Western blot quantifications of cell lysates (Lysate) and supernatants (SN) of ISG15 transfected HEK293-ANPEP cells after infection with HCoV-229E for detection of ISG15.

## Sheet: SuppTable_1
Go to ––> _listAllTables
Supplementary Table 1.	Data of rodents and bats screened for viruses using Metagenomics or High-throughput sequencing approaches. Bat records were split into families.
	Data was used to generate Fig. 1A and B, obtained from ZOVER database using the links of the two integrated databases DBatVir and DRodVir (http://www.mgc.ac.cn/DBatVir/ and http://www.mgc.ac.cn/DRodVir/) and filtering for "Metagenomics/HTS" (last access, January 25, 2023).
	total virus count	Coronaviridae count	Coronaviridae percentage (relative to the total number of records per family)
Rhinolophidae	161	67	0.42
Hipposideridae	41	13	0.32
Vespertilionidae	301	84	0.28
Pteropodidae	294	30	0.1
Miniopteridae	125	12	0.1
Emballonuridae	12	1	0.08
Molossidae	75	2	0.03
Phyllostomidae	70	1	0.01
Nycteridae	1	0	0
Rhinopomatidae	8	0	0
All Rodents	1261	18	0.01
All Bats	1179	211	0.18

## Sheet: SuppTable_2
Go to ––> _listAllTables
Supplementary Table 2.	Information of new bat genomes. Museum ID, sampling locality, genome assembly statistics and BUSCO values.
							Sample information								PacBio HiFi		ONT		10x Genomics linked reads		Arima HiC *	Arima HiC+ **	Genome stats								BUSCO - genome (human as reference)							TOGA annotation stats - 18430 ancestral mammalian genes				BUSCO - proteins from TOGA annotation
group	Family	ScientificName	CommonName	internal assemblyID	sampleID_sequencingCenter	NCBI Taxonomy ID	Catalogue ID	Locality	Sex	Lat (decimal degrees)	Long(decimal degrees)	Date	Collectors		tissue	extraction	tissue	extraction	tissue	extraction	tissue	tissue	GenomeSize	N50_contig	N90_contig	N50_scaffold	N90_scaffold	QVs	%assembly in chromosome-level scaffolds	Chromosome number (autosomes + sex chromosomes)	Complete	Single Copy	Duplicated	Fragmented	Missing	n_mammalia_odb10		Intact Genes	inact. Mutations (L+UL)	Missing(M+abs+PM+PG+PI)		Complete	Single Copy	Duplicated	Fragmented	Missing	n_mammalia_odb10
Chiroptera	Hipposideridae	Aselliscus stoliczkanus	Stoliczka's trident bat	HLaseSto2	mAseSto	188568	ROM-M118506	China – Shuipu Village, Yuping Town	M	25.4831	107.882	2007-03-28	Lim, BK; Eger, JL		soft organ mix	circulomics	-	-	-	-	-	soft organ mix	2.27	72237226	32564094	162401845	137843873	67.0862	98.3	14 + X + Y	96.6	0.939	2.7	0.6	2.8	9226		17292	1048	90		98.2	57.1	41.1	0.4	1.4	9226
Chiroptera	Hipposideridae	Doryrhina cyclops	cyclops roundleaf bat	HLhipCyc2	mHipCyc	249021	ROM-M100513	Ivory Coast – Parc National De Tai, Institute D'ecologie Tropicale	F	5.8333	-7.3333	1992-02-18	Lim, BK		liver	circulomics	-	-	-	-	liver	-	2.39	16643583	5947717	186279369	131835836	61.8107	98.8	17 + X	96.5	0.948	1.7	0.6	2.9	9226		17256	1026	148		97.9	56.6	41.3	0.4	1.7	9226
Chiroptera	Hipposideridae	Hipposideros larvatus	-	HLhipLar2	mHipLar	175524	ROM-M118627	China – Shuipu Village, Yuping Town	M	25.4831	107.882	2007-04-12	Lim, BK; Eger, JL		soft organ mix	circulomics	-	-	-	-	soft organ mix	-	2.38	24080076	8460041	183812707	103861496	65.5195	91.8	15 + X	96.3	0.943	2	0.7	3	9226		17535	809	86		98.4	56.8	41.6	0.3	1.3	9226
Chiroptera	Rhinolophidae	Rhinolophus affinis	intermediate horseshoe bat	HLrhiAff2	mRhiAff	59477	ROM-M116429	China – Shiwandashan National Reserve	M	21.8461	107.889	2005-04-25	Lim, BK; Eger, JL		liver	circulomics	-	-	-	-	liver	-	2.3	66263187	23789475	93837138	45443326	66.9083	92.0	30 + X + Y	97	0.959	1.1	0.6	2.4	9226		17513	829	88		98.6	57.2	41.4	0.3	1.1	9226
Chiroptera	Rhinolophidae	Rhinolophus lanosus	Woolly horseshoe bat	HLrhiLuc4	mRhiCfl	337453	ROM-M118548	China – Shuipu Village, Yuping Town	M	25.4831	107.882	39174	Lim, BK; Eger, JL		liver	circulomics	-	-	-	-	liver	-	2.19	54411954	18693806	196844650	83656701	69.6893	98.2	15 + X + Y	96.9	0.951	1.8	0.6	2.5	9226		17391	926	113		98.2	56.5	41.7	0.2	1.6	9226
Chiroptera	Rhinolophidae	Rhinolophus yonghoiseni	lesser woolly horseshoe bat	HLrhiSed2	mRhiSed	59480	ROM-M113050	Malaysia – Nature Education and Research Centre, Endau Rompin National Park	F	2.5333	103.4	2001-08-14	Lim, BK; Peters, SL; John, L		soft organ mix	circulomics	-	-	-	-	soft organ mix	-	2.32	30619564	9856874	186824987	99937453	62.576	92.4	13 + X	96.5	0.952	1.3	0.8	2.7	9226		17313	1015	102		97.8	56.7	41.1	0.4	1.8	9226
Chiroptera	Rhinolophidae	Rhinolophus trifoliatus	Trefoil horseshoe bat	HLrhiTri2	mRhiTri	430492	ROM-M113012	Malaysia – Nature Education and Research Centre, Endau Rompin National Park	M	2.5333	103.4	2001-08-10	Lim, BK; Peters, SL; John, L		liver	circulomics	-	-	-	-	heart	-	2.23	12537531	4338730	187818050	92091489	68.4294	97.2	15 + X + Y	96.1	0.942	1.9	0.7	3.2	9226		17224	1041	165		97.3	56.1	41.2	0.4	2.3	9226
Chiroptera	Rhinopomatidae	Rhinopoma microphyllum	Greater mouse-tailed bat	HLrhiMic1	mRhiMic1	173903	NA	Israel – Northern Israel	M	33.126	35.5692	2013-01-13	Amichai, E; Levin, E; Boonman, A		liver	circulomics	-	-	-	-	-	liver	2.56	43859888	17044543	167895859	113191818	67.26	96.1	20 + X	96.6	95.5	1.1	0.7	2.7	9226		17490	839	101		98.3	57	41.3	0.4	1.3	9226
Chiroptera	Megadermatidae	Megaderma spasma	lesser false vampire bat	HLmegSpa1	mMegSpa1	9414	ROM-M110751	Vietnam – Dong Nai, Cat Tien National Park Headquarters	M	11.4197	107.427	1998-05-05	Eger, JL; Lim, BK; Mitchell, L		-	-	liver	circulomics	liver	circulomics	-	liver	2.12	26641141	3768291	136213956	79331738	39.03	97.3	18 + Y	96.6	95.3	1.3	0.5	2.9	9226		17153	1001	276		97	56.4	40.6	0.3	2.7	9226
Chiroptera	Molossidae	Mops condylurus	Angolan free-tailed bat	HLmopCon1	mMopCon1	258863	ID: 03#106	Côte d’Ivoire – Bregbo Village	M	5.30382	3.82327	2019-11-20	Riesle-Sbarbaro S.A; Kurth A		liver	circulomics	-	-	-	-	-	liver	2.21	60313879	25457991	108848936	72035608	66.78	99.7	23 + X	95.5	93.7	1.8	0.7	3.8	9226		16843	1428	159		95.8	55.6	40.2	1.1	3.1	9226
Genome sequecing information:
* Arima HiC protocol (two enzyme version)
** Arima HiC+ protocol (four enzyme version)
Soft organ mix: liver and spleen tissue as input for gDNA extraction
Circulomics kit: HMW gDNA was extracted with the Circulomics Nanobind Tissue Big DNA kit

## Sheet: SuppTable_3
Go to ––> _listAllTables
Supplementary Table 3.	Accession numbers and annotation statistics of genomes from 50 bats included in the phylogenomics analysis.
										TOGA stats - ancestral geneSet												BUSCO - TOGA annotation (human as reference)
group	Family	ScientificName	CommonName	Assembly ID	Taxonomy ID	Genbank	SubmitterOrganization	ContigN50	ScaffoldN50	Intact Genes	inact. Mutations (L+UL)	Missing(M+abs+PM+PG+PI)	L=lost	UL=UncertainLoss	M=missing	PM=PartiallyMissing	I=IntactORF	PI=PartiallyIntactORF	abs=absent	PG=ParalogousProjection		Complete	Single Copy	Duplicated	Fragmented	Missing	n_mammalia_odb10
Bats	Vespertilionidae	Aeorestes cinereus	hoary bat	HLaeoCin1	257879	GCA_011751065.1	United States Geological Survey	120638	35075546	15443	1378	1609	806	572	502	32	15443	940	0	135		96.1	51.5	44.6	1.3	2.6	9226
Bats	Phyllostomidae	Anoura caudifer	tailed tailless bat	HLanoCau1	27642	GCA_004027475.1	Broad Institute	143417	185021	15853	1206	1371	717	489	203	145	15853	842	0	181		96.7	52.9	43.8	1.2	2.1	9226
Bats	Phyllostomidae	Artibeus jamaicensis	Jamaican fruit-eating bat	HLartJam2	9417	GCA_014825515.1	College of Life Sciences at Wuhan University	374929	2589479	16655	1309	466	621	688	59	33	16655	346	0	28		98.6	53.9	44.7	0.6	0.8	9226
Bats	Hipposideridae	Aselliscus stoliczkanus	Stoliczka's trident bat	HLaseSto2	188568	this study		64984936	162130651	17292	1048	90	566	482	22	10	17292	48	1	9		98.2	57.1	41.1	0.4	1.4	9226
Bats	Craseonycteridae	Craseonycteris thonglongyai	hog-nosed bat	HLcraTho1	208972	GCA_004027555.1	Broad Institute	23218	25762	14305	1206	2919	664	542	224	265	14305	2206	0	224		93.3	52.5	40.8	3	3.7	9226
Bats	Phyllostomidae	Desmodus rotundus	common vampire bat	HLdesRot8A	9430			6847608	160131551	17076	1141	213	678	463	121	24	17076	59	0	9		98.7	53.9	44.8	0.2	1.1	9226
Bats	Pteropodidae	Eidolon dupreanum	Malagasy straw-colored fruit bat	HLeidDup1	58063			108606	101563129	14674	1343	2413	776	567	523	44	14674	1834	0	12		92.2	50.6	41.6	3.3	4.5	9226
Bats	Vespertilionidae	Eptesicus fuscus	big brown bat	HLeptFus2	29078			18728	102216854	14723	931	2776	528	403	778	26	14723	1940	0	32		97.8	53.4	44.4	1.3	0.9	9226
Bats	Hipposideridae	Hipposideros armiger	great roundleaf bat	HLhipArm1	186990	GCA_001890085.1	SKLEC & IECR	39863	2328177	14059	1376	2995	556	820	503	30	14059	2435	0	27		93.6	51.3	42.3	2.8	3.6	9226
Bats	Hipposideridae	Doryrhina cyclops	cyclops roundleaf bat	HLhipCyc2	249021	this study		14255823	154073572	17256	1026	148	557	469	40	17	17256	72	1	18		97.9	56.6	41.3	0.4	1.7	9226
Bats	Hipposideridae	Hipposideros galeritus	Cantor's roundleaf bat	HLhipGal1	58069	GCA_004027415.1	Broad Institute	33704	37985	14354	1108	2968	573	535	200	155	14354	2475	0	138		94	52.5	41.5	3	3	9226
Bats	Hipposideridae	Hipposideros larvatus	-	HLhipLar2	175524	this study		19276934	176501180	17535	809	86	432	377	20	8	17535	52	0	6		98.4	56.8	41.6	0.3	1.3	9226
Bats	Phyllostomidae	Leptonycteris yerbabuenae	Lesser long-nosed bat	HLlepYer1	700936			37711	14735151	16085	1354	991	675	679	248	17	16085	668	0	58		97.7	53.6	44.1	1.2	1.1	9226
Bats	Pteropodidae	Macroglossus sobrinus	-	HLmacSob1	326083	GCA_004027375.1	Broad Institute	338389	453401	16280	1115	1035	667	448	102	69	16280	807	0	57		97.8	53.5	44.3	1	1.2	9226
Bats	Megadermatidae	Megaderma lyra	Indian false vampire	HLmegLyr2	9413	GCA_004026885.1	Broad Institute	71674	96489	16189	1043	1198	621	422	128	79	16189	884	0	107		98.1	53.7	44.4	0.9	1	9226
Bats	Megadermatidae	Megaderma spasma	lesser false vampire bat	HLmegSpa1	9414	this study		25520250	120949103	16843	1428	159	563	865	45	24	16843	68	0	22		95.8	55.6	40.2	1.1	3.1	9226
Bats	Phyllostomidae	Micronycteris hirsuta	-	HLmicHir1	148065	GCA_004026765.1	Broad Institute	62961	68868	13762	1246	3422	739	507	549	466	13762	2077	0	330		89	48.9	40.1	3.7	7.3	9226
Bats	Vespertilionidae	Miniopterus natalensis	-	HLminNat1	291302	GCA_001595765.1	University of California, San Francisco	29777	4315193	14201	1099	3130	630	469	869	9	14201	2230	0	22		96.9	52.5	44.4	1.9	1.2	9226
Bats	Vespertilionidae	Miniopterus schreibersii	Schreibers' long-fingered bat	HLminSch1	9433	GCA_004026525.1	Broad Institute	82539	108707	16002	1068	1360	620	448	139	63	16002	1058	0	100		98.3	54	44.3	0.8	0.9	9226
Bats	Molossidae	Molossus molossus	Pallas's mastiff bat	HLmolMol2	27622	GCA_014108415.1		21658165	110665204	17230	1085	115	596	489	44	5	17230	53	0	13		99.4	54.3	45.1	0.1	0.5	9226
Bats	Molossidae	Mops condylurus	Angolan free-tailed bat	HLmopCon1	258863	this study		56964224	105478936	17153	1001	276	595	406	152	19	17153	62	0	43		97	56.4	40.6	0.3	2.7	9226
Bats	Mormoopidae	Mormoops blainvillei	Antillean ghost-faced bat	HLmorBla1	118852	GCA_004026545.1	Broad Institute	142682	156292	14928	1218	2284	730	488	310	250	14928	1480	0	244		93.4	51.6	41.8	2.4	4.2	9226
Bats	Vespertilionidae	Murina aurata feae	Little tube-nosed bat	HLmurAurFea1	1453894	GCA_004026665.1	Broad Institute	23400	26051	13406	1213	3811	684	529	391	317	13406	2862	0	241		91.5	52	39.5	3.9	4.6	9226
Bats	Vespertilionidae	Myotis myotis	-	HLmyoMyo6	51298	GCA_014108235.1		11795106	94448911	17169	1073	188	592	481	74	7	17169	80	0	27		99.4	54.3	45.1	0.1	0.5	9226
Bats	Vespertilionidae	Myotis septentrionalis	Northern long-eared myotis	HLmyoSep1	258941			205441	96689946	15599	1809	1022	676	1133	282	2	15599	719	0	19		96.9	52.9	44	1	2.1	9226
Bats	Noctilionidae	Noctilio leporinus	greater bulldog bat	HLnocLep1	94963	GCA_004026585.1	Broad Institute	135651	191494	16036	1195	1199	739	456	191	119	16036	718	0	171		96.6	52.8	43.8	1.1	2.3	9226
Bats	Phyllostomidae	Phyllostomus discolor	pale spear-nosed bat	HLphyDis3	89673	GCA_014049915.1		15176516	171075004	17259	1046	125	591	455	37	4	17259	71	0	13		99.4	54.2	45.2	0.1	0.5	9226
Bats	Vespertilionidae	Pipistrellus kuhlii	Kuhl's pipistrelle	HLpipKuh2	59472	GCA_014108245.1		10239182	80237350	16995	1206	229	709	497	63	14	16995	80	0	72		99.1	53.9	45.2	0.2	0.7	9226
Bats	Vespertilionidae	Pipistrellus pipistrellus	common pipistrelle	HLpipPip2	59474	GCA_903992545.1	SC	4446752	94929986	14990	2295	1145	1270	1025	677	14	14990	371	0	83		92.7	50.6	42.1	0.7	6.6	9226
Bats	Pteropodidae	Pteropus giganteus	Indian flying fox	HLpteGig1	143291	GCA_902729225.1	CIRI-Inserm-U1111	255763	18871253	16400	1369	661	468	901	105	6	16400	535	0	15		98.5	53.7	44.8	0.5	1	9226
Bats	Mormoopidae	Pteronotus parnellii mesoamericanus	Parnell's mustached bat	HLpteMes1	1884717			31480947	31480947	17224	1079	127	603	476	28	13	17224	63	0	23		97.9	57.1	40.8	0.3	1.8	9226
Bats	Pteropodidae	Pteropus pselaphon	Bonin flying fox	HLptePse1	1496133	GCA_014363405.1	Environmental Genomics Office, Center for Enviromental Biology and Ecosystem Studies, National Institute for Environmental Studies	394964	770409	17101	887	442	509	378	87	24	17101	280	0	51		99.4	54.2	45.2	0.3	0.3	9226
Bats	Pteropodidae	Pteropus rufus	Malagasy flying fox	HLpteRuf1	196297			213552	110476781	16281	1013	1136	601	412	228	10	16281	894	0	4		97.3	53.2	44.1	1.1	1.6	9226
Bats	Pteropodidae	Pteropus vampyrus	large flying fox	HLpteVam3	132908			19141	123279187	13515	1008	3907	451	557	702	13	13515	3185	0	7		94.9	51.9	43	2.7	2.4	9226
Bats	Rhinolophidae	Rhinolophus affinis	intermediate horseshoe bat	HLrhiAff2	59477	this study		65534120	85365043	17513	829	88	445	384	25	13	17513	41	0	9		98.6	57.2	41.4	0.3	1.1	9226
Bats	Rhinolophidae	Rhinolophus ferrumequinum	greater horseshoe bat	HLrhiFer5	59479	GCA_014108255.1		21749602	91996154	17399	841	190	451	390	99	8	17399	65	0	18		99.2	54.2	45	0.1	0.7	9226
Bats	Rhinolophidae	Rhinolophus lanosus	Woolly horseshoe bat	HLrhiLuc4	337453	this study		53323821	154900566	17391	926	113	515	411	23	16	17391	52	0	22		98.2	56.5	41.7	0.2	1.6	9226
Bats	Rhinopomatidae	Rhinopoma microphyllum	Greater mouse-tailed bat	HLrhiMic1	173903	this study		33347918	146810189	17490	839	101	431	408	26	9	17490	57	0	9		98.3	57	41.3	0.4	1.3	9226
Bats	Rhinolophidae	Rhinolophus yonghoiseni	Yong Hoi Sen's Woolly Horseshoe Bat	HLrhiSed2	59480	this study		28095277	181652838	17313	1015	102	526	489	28	11	17313	55	0	8		97.8	56.7	41.1	0.4	1.8	9226
Bats	Rhinolophidae	Rhinolophus sinicus	Chinese rufous horseshoe bat	HLrhiSin1	89399	GCA_001888835.1	SKLEC & IECR	37803	3754400	16262	1138	1030	523	615	291	11	16262	696	0	32		99.2	54.2	45	0.5	0.3	9226
Bats	Rhinolophidae	Rhinolophus trifoliatus	Trefoil horseshoe bat	HLrhiTri2	430492	this study		11115074	184920896	17224	1041	165	572	469	80	19	17224	51	0	15		97.3	56.1	41.2	0.4	2.3	9226
Bats	Pteropodidae	Rousettus aegyptiacus	Egyptian rousette	HLrouAeg4	9407	GCA_014176215.1		21756723	113811795	17350	975	105	539	436	30	3	17350	55	0	17		99.6	54.6	45	0.1	0.3	9226
Bats	Pteropodidae	Rousettus leschenaultii	Leschenault's rousette	HLrouLes1	9408	GCA_015472975.1	Comparative Genomics Laboratory, Center for Information Biology, National Institute of Genetics	40477	32720144	17003	928	499	499	429	102	3	17003	384	0	10		99.5	54.4	45.1	0.1	0.4	9226
Bats	Pteropodidae	Rousettus madagascariensis	Madagascan rousette	HLrouMad1	77223			63376	85834856	14102	1361	2967	773	588	543	39	14102	2369	0	16		90.6	50.2	40.4	4.2	5.2	9226
Bats	Phyllostomidae	Sturnira hondurensis	-	HLstuHon1	192404	GCA_014824575.1	College of Life Sciences at Wuhan University	2136421	10164808	16463	1238	729	746	492	342	41	16463	129	0	217		96	52.2	43.8	0.3	3.7	9226
Bats	Phyllostomidae	Tonatia saurophila	stripe-headed round-eared bat	HLtonSau1	171122	GCA_004024845.1	Broad Institute	141649	165561	16029	1101	1300	631	470	125	81	16029	1001	0	93		97.3	53.5	43.8	1.3	1.4	9226
Bats	Vespertilionidae	Myotis brandtii	Brandts myotis bat	myoBra1	109478	GCA_000412655.1	BGI	23289	3225832	12275	1604	4551	649	955	1452	10	12275	3034	0	55		92.6	49.9	42.7	4.1	3.3	9226
Bats	Vespertilionidae	Myotis davidii	Davids myotis bat	myoDav1	225400	GCA_000327345.1	BGI	15182	3454484	11028	2194	5208	780	1414	1473	24	11028	3651	0	60		91.5	49	42.5	4.7	3.8	9226
Bats	Vespertilionidae	Myotis lucifugus	little brown bat	myoLuc2	59463	GCA_000147115.1	Broad Institute	64330	4293315	12610	2504	3316	706	1798	967	171	12610	1933	0	245		90.7	48.7	42	3.3	6	9226
Bats	Pteropodidae	Pteropus alecto	black flying fox	pteAle1	9402	GCA_000325575.1	BGI	31841	15954802	14114	1429	2887	624	805	675	24	14114	2171	0	17		98.7	53.9	44.8	0.7	0.6	9226

## Sheet: SuppTable_4
Go to ––> _listAllTables
Supplementary Table 4.	Fossil calibrations used to estimate divergence times of phylogeny with 50 bats or 115 mammals as reported in Teeling et al. (2005; PMID15681385) and Foley et al. (2016; PMC4920340).
TaxonomicGroup	named node in the tree	minAge (MYA)	maxAge (MYA)
Chiroptera	Chiroptera	57.9	61.7
Yinpterochiroptera	Bat_Yin	53.6	53.7
Yangochiroptera	Bat_Yang	51.7	51.8
Vespertilionoidea	Bat_sFVespertilionoidea	47.1	47.2
Vespertilionidae	Bat_Vespertilionidae	46.9	47
Rhinopomatoidea	Bat_sFRhinopomatoidea	46.5	46.3
Rhinolophoidea	Bat_sFRhinolophoidea	43.5	43.6
Notilionoidea	Bat_sFNoctilionoidea	42.6	42.7
Craseonyteridae+Megadermatidae	Bat_2fCraMeg	42.4	42.5
Megadermatidae	Bat_Megadermatidae	38.9	39.2
Molossidae+Phyllostomidae	Bat_2fMorPhy	38.7	38.8
Molossidae	Bat_Molossidae	35.6	36.1
Pteropodidae	Bat_Pteropodidae	35.1	35.7
Mormoopidae	Bat_Mormoopidae	33.6	34.9
RhinolophidaeHipposideridae	Bat_2fRhinosHippos	28.7	33.7
Phyllostomidae	Bat_Phyllostomidae	27.3	27.4
Hipposideridae	Bat_Hipposideridae	25.5	26.5
TaxonomicGroup	named node in the Tree	minAge (MYA)	maxAge (MYA)	Label in Foley et al. (2016)
Placentalia	Root	62.5	131.5	Placentalia
Primates	Primates	38	66
Primates	Pri_5fPiCebCerHyHo	38	59.2	Haplorhini
Primates	Pri_3fCerHyHo	20.55	38	Catarrhini
Primates	Pri_2fHylHom	12.68	23.03	Hominoidea
Primates	Pri_Ho2gHoPa	5.11	7.246	Homo + Pan
Primates	Pri_Cercopithecidae	8.5	13.82	Cercopithecoidea
Primates	Pri_2fPiCeb	11.8	37.3	Platyrrhini
Primates	Pri_4fGaDaChLe	38	56	Strepsirrhini
Rodentia	Rodentia	56	66
Rodentia	Rod_4fPeDiMuCr	54	61.6	Anomaluromorpha + Myomorpha
Rodentia	Rod_3fDiMuCr	45	59.2	Myomorpha (Muroidea + Dipodoidea)
Rodentia	Rod_M4gRaArMaMu	11.1	16	Rattus–Mus (Karnimata)
Rodentia	Rod_4fDinErHydCa	24.5	38	Chinchillidae + Dinomyidae
Rodentia	Rod_2fHydCa	24.5	38	Caviidae + Hydrochoeridae + Dasyproctidae
Rodentia	Rod_2fScXe	47.8	61.6	Sciuromorpha
Lagomorpha	Lagomorpha	53.7	61.6
Chiroptera	Chiroptera	47.8	66
Chiroptera	Bat_Yin	53	63
Chiroptera	Bat_Yin4fMgRhRhHi	48	55
Chiroptera	Bat_2fRhinosHippos	38	56	Hipposideridae + Rhinolophidae
Chiroptera	Bat_Yang	47.8	61.6
Chiroptera	Bat_2fMorPhy	28.1	41.3	Phyllostomidae + Mormoopidae
Chiroptera	Bat_2fVespMol	38	56	Molossidae + Vespertilionidae + Miniopteridae
Cetartiodactyla	Cetartiodactyla	52.5	66
Cetartiodactyla	CA_2fBoMo	18	21.8	Moschidae to Bovidae
Cetartiodactyla	CA_2fAnGi	17.8	28.1	Giraffidae to Antilocapridae
Cetartiodactyla	CA_2fTaSu	15.97	38	Suidae to Tayassuidae
Perissodactyla	Perissodactyla	55.5	61.6
Perissodactyla	Per_2fTaRh	53.7	61.6	Ceratomorpha
Carnivora	Carnivora	38	66
Carnivora	Car_2fHynEupl	15.97	28.1	Herpestidae + Eupleridae + Hyaenidae
Carnivora	Car_6fCaUrPhOdOtMu	38	56	Caniformia
Carnivora	Car_5fUrPhOdOtMu	28.1	41.3	Arctoidea
Carnivora	Car_4fPhOdOtMu	24.8	38	Pinnipedia + Musteloidea
Carnivora	Car_3fPhOdOt	20.43	33.9	Pinnipedia
Carnivora	Car_2fOdOt	16.6	28.1	Odobenidae + Otariidae
Afrotheria	Afr_2fElPr	59.2	72.3	Hyracoidea + Proboscidea

## Sheet: SuppTable_5
Go to ––> _listAllTables
Supplementary Table 5.	Accession numbers and annotation statistics of genomes from 115 mammals included in our selection screen.
										TOGA stats - 18430 ancestral mammalian genes												BUSCO - TOGA annotation (human as reference)							Used in subsampling replicates (1=yes)
group	Family	ScientificName	CommonName	Assembly ID	Taxonomy ID	Genbank	SubmitterOrganization	ContigN50	ScaffoldN50	Intact Genes	inact. Mutations (L+UL)	Missing(M+abs+PM+PG+PI)	L=lost	UL=UncertainLoss	M=missing	PM=PartiallyMissing	I=IntactORF	PI=PArtiallyIntactORF	abs=absent	PG=ParalogousProjection		Complete	Single Copy	Duplicated	Fragmented	Missing	n_mammalia_odb10		sub_01	sub_02	sub_03	sub_04_comp01
Chiroptera	Rhinolophidae	Rhinolophus affinis	intermediate horseshoe bat	HLrhiAff2	59477	this study		65534120	85365043	17513	829	88	445	384	25	13	17513	41	0	9		98.6	57.2	41.4	0.3	1.1	9226		1		1
Chiroptera	Hipposideridae	Hipposideros larvatus	-	HLhipLar2	175524	this study		19276934	176501180	17535	809	86	432	377	20	8	17535	52	0	6		98.4	56.8	41.6	0.3	1.3	9226		1
Chiroptera	Rhinopomatidae	Rhinopoma microphyllum	Greater mouse-tailed bat	HLrhiMic1	173903	this study		33347918	146810189	17490	839	101	431	408	26	9	17490	57	0	9		98.3	57	41.3	0.4	1.3	9226			1	1	1
Chiroptera	Rhinolophidae	Rhinolophus ferrumequinum	greater horseshoe bat	HLrhiFer5	59479	GCA_014108255.1		21749602	91996154	17399	841	190	451	390	99	8	17399	65	0	18		99.2	54.2	45	0.1	0.7	9226			1	1	1
Chiroptera	Rhinolophidae	Rhinolophus lanosus	Woolly horseshoe bat	HLrhiLuc4	337453	this study		53323821	154900566	17391	926	113	515	411	23	16	17391	52	0	22		98.2	56.5	41.7	0.2	1.6	9226				1	1
Chiroptera	Pteropodidae	Rousettus aegyptiacus	Egyptian rousette	HLrouAeg4	9407	GCA_014176215.1		21756723	113811795	17350	975	105	539	436	30	3	17350	55	0	17		99.6	54.6	45	0.1	0.3	9226		1	1
Chiroptera	Rhinolophidae	Rhinolophus yonghoiseni	Yong Hoi Sen's Woolly Horseshoe Bat	HLrhiSed2	59480	this study		28095277	181652838	17313	1015	102	526	489	28	11	17313	55	0	8		97.8	56.7	41.1	0.4	1.8	9226		1	1	1
Chiroptera	Hipposideridae	Aselliscus stoliczkanus	Stoliczka's trident bat	HLaseSto2	188568	this study		64984936	162130651	17292	1048	90	566	482	22	10	17292	48	1	9		98.2	57.1	41.1	0.4	1.4	9226		1	1	1
Chiroptera	Phyllostomidae	Phyllostomus discolor	pale spear-nosed bat	HLphyDis3	89673	GCA_014049915.1		15176516	171075004	17259	1046	125	591	455	37	4	17259	71	0	13		99.4	54.2	45.2	0.1	0.5	9226					1
Chiroptera	Rhinolophidae	Rhinolophus trifoliatus	Trefoil horseshoe bat	HLrhiTri2	430492	this study		11115074	184920896	17224	1041	165	572	469	80	19	17224	51	0	15		97.3	56.1	41.2	0.4	2.3	9226		1		1
Chiroptera	Mormoopidae	Pteronotus parnellii mesoamericanus	Parnell's mustached bat	HLpteMes1	1884717	Scheben https://www.biorxiv.org/content/10.1101/2020.09.09.290502v2		31480947	31480947	17224	1079	127	603	476	28	13	17224	63	0	23		97.9	57.1	40.8	0.3	1.8	9226			1		1
Chiroptera	Molossidae	Molossus molossus	Pallas's mastiff bat	HLmolMol2	27622	GCA_014108415.1		21658165	110665204	17230	1085	115	596	489	44	5	17230	53	0	13		99.4	54.3	45.1	0.1	0.5	9226					1
Chiroptera	Hipposideridae	Doryrhina cyclops	cyclops roundleaf bat	HLhipCyc2	249021	this study		14255823	154073572	17256	1026	148	557	469	40	17	17256	72	1	18		97.9	56.6	41.3	0.4	1.7	9226		1	1	1
Chiroptera	Molossidae	Mops condylurus	Angolan free-tailed bat	HLmopCon1	258863	this study		56964224	105478936	17153	1001	276	595	406	152	19	17153	62	0	43		97	56.4	40.6	0.3	2.7	9226		1
Chiroptera	Vespertilionidae	Myotis myotis	-	HLmyoMyo6	51298	GCA_014108235.1		11795106	94448911	17169	1073	188	592	481	74	7	17169	80	0	27		99.4	54.3	45.1	0.1	0.5	9226			1	1	1
Chiroptera	Phyllostomidae	Desmodus rotundus	common vampire bat	HLdesRot8A	9430			6847608	160131551	17076	1141	213	678	463	121	24	17076	59	0	9		98.7	53.9	44.8	0.2	1.1	9226			1	1	1
Chiroptera	Vespertilionidae	Pipistrellus kuhlii	Kuhl's pipistrelle	HLpipKuh2	59472	GCA_014108245.1		10239182	80237350	16995	1206	229	709	497	63	14	16995	80	0	72		99.1	53.9	45.2	0.2	0.7	9226		1
Chiroptera	Megadermatidae	Megaderma spasma	lesser false vampire bat	HLmegSpa1	9414	this study		25520250	120949103	16843	1428	159	563	865	45	24	16843	68	0	22		95.8	55.6	40.2	1.1	3.1	9226					1
Chiroptera	Phyllostomidae	Sturnira hondurensis	-	HLstuHon1	192404	GCA_014824575.1	College of Life Sciences at Wuhan University	2136421	10164808	16463	1238	729	746	492	342	41	16463	129	0	217		96	52.2	43.8	0.3	3.7	9226					1
Chiroptera	Rhinolophidae	Rhinolophus sinicus	Chinese rufous horseshoe bat	HLrhiSin1	89399	GCA_001888835.1	SKLEC & IECR	37803	3754400	16262	1138	1030	523	615	291	11	16262	696	0	32		99.2	54.2	45	0.5	0.3	9226		1	1
Carnivora	Mustelidae	Neovison vison	American mink	HLneoVis2	452646	GCA_020171115.1	Dalhousie University	220349319	220349319	17721	625	84	286	339	10	18	17721	53	0	3		98.6	56.8	41.8	0.2	1.2	9226		1	1
Carnivora	Mustelidae	Mustela erminea	ermine	HLmusErm1	36723	GCA_009829155.1	Vertebrate Genomes Project	36329944	130149454	17536	797	97	281	516	36	3	17536	57	0	1		99.3	54.2	45.1	0.1	0.6	9226				1	1
Carnivora	Ursidae	Ursus arctos horribilis	brown bear	HLursArc1	116960	GCA_003584765.1	Canada's Genomic Enterprise	314844	36708181	17376	714	340	307	407	66	3	17376	267	0	4		99.6	53.9	45.7	0.2	0.2	9226				1	1
Carnivora	Hyaenidae	Hyaena hyaena	striped hyena	HLhyaHya1	95912	GCA_003009895.1	Potsdam University	311202	2001327	17389	771	270	261	510	35	11	17389	214	0	10		99.6	54.4	45.2	0.2	0.2	9226		1	1	1
Carnivora	Canidae	Nyctereutes procyonoides	raccoon dog	HLnycPro4	34880	GCA_905146905.1	Senckenber Biodiversity and Climate Research Centre Frankfurt	35077230	53959811	17335	967	128	287	680	45	12	17335	56	0	15		99.5	53.9	45.6	0.1	0.4	9226			1		1
Carnivora	Canidae	Vulpes lagopus	Arctic fox	HLvulLag2	494514	GCA_018345385.1	Hebei Normal University of Science and Technology	33460300	131537142	17371	925	134	379	546	44	18	17371	67	0	5		99.3	54.3	45	0.2	0.5	9226				1	1
Carnivora	Canidae	Canis lupus familiaris	dog	canFam4	9615	GCA_011100685.1	Uppsala University	14840767	64299765	17269	1078	83	309	769	7	3	17269	70	0	3		99.6	54.3	45.3	0.2	0.2	9226					1
Carnivora	Felidae	Neofelis nebulosa	Clouded leopard	HLneoNeb1	61452			76067	147111411	17187	715	528	291	424	134	5	17187	388	0	1		99.7	54.5	45.2	0.1	0.2	9226			1	1	1
Carnivora	Mustelidae	Lutra lutra	Eurasian river otter	HLlutLut1	9657	GCA_902655055.1	SC	30403456	149004807	17172	1165	93	378	787	37	3	17172	53	0	0		99.7	54.5	45.2	0.1	0.2	9226		1	1	1
Carnivora	Felidae	Acinonyx jubatus	cheetah	HLaciJub2	32536	GCA_003709585.1	Felidae consortium	179924	48500042	17108	842	480	316	526	147	16	17108	315	0	2		99.5	54.2	45.3	0.2	0.3	9226		1
Carnivora	Phocidae	Phoca vitulina	harbor seal	HLphoVit1	9720	GCA_004348235.1	Canada's Genome Enterprise (CGEN)	283887	41024070	17105	998	327	410	588	75	4	17105	244	0	4		99.5	54.2	45.3	0.3	0.2	9226		1	1
Carnivora	Odobenidae	Odobenus rosmarus divergens	Pacific walrus	odoRosDiv1	9708	GCA_000321225.1	Marine mammals	89951	2616778	17007	928	495	393	535	98	8	17007	384	0	5		99.5	54.3	45.2	0.2	0.3	9226				1	1
Carnivora	Mustelidae	Mustela nivalis	least weasel	HLmusNiv1	36239	GCA_019141155.1	CIBIO-InBIO	195927	24899452	16892	881	657	331	550	200	29	16892	418	0	10		96.3	55.8	40.5	0.7	3	9226			1		1
Carnivora	Felidae	Felis catus	domestic cat	felCat9	9685	GCA_000181335.4	Genome Sequencing Center (GSC) at Washington University (WashU) School of Medicine	41915695	83967707	16792	1537	101	337	1200	21	8	16792	71	0	1		99.7	54.3	45.4	0.1	0.2	9226		1		1
Carnivora	Mustelidae	Pteronura brasiliensis	giant otter	HLpteBra1	9672	GCA_004024605.1	Broad Institute	90879	119023	16767	830	833	392	438	79	44	16767	678	0	32		98.6	54	44.6	0.7	0.7	9226					1
Carnivora	Canidae	Otocyon megalotis	bat-eared fox	HLotoMeg2	9624			616011	68620662	16645	998	787	377	621	131	11	16645	639	0	6		93.2	54.2	39	1.4	5.4	9226		1	1	1
Carnivora	Otariidae	Zalophus californianus	California sea lion	HLzalCal1	9704	GCA_009762305.1	Vertebrate Genomes Project	60554208	146931682	16627	1730	73	492	1238	7	7	16627	58	0	1		99.7	54.5	45.2	0.1	0.2	9226		1	1	1
Carnivora	Hyaenidae	Proteles cristata cristata	aardwolf	HLproCriCri1	2793304	GCA_017311185.1	CNRS	1258344	1308801	16504	1052	874	362	690	106	110	16504	585	0	73		96.9	53	43.9	1.1	2	9226		1	1
Carnivora	Felidae	Lynx canadensis	Canada lynx	HLlynCan1	61383	GCA_007474595.1	Vertebrate Genomes Project	7503561	146106016	16401	1750	279	611	1139	130	4	16401	145	0	0		98.8	53.9	44.9	0.3	0.9	9226					1
Carnivora	Eupleridae	Cryptoprocta ferox	fossa	HLcryFer2	94188			123817	107277967	16384	884	1162	472	412	184	4	16384	972	0	2		98	53.6	44.4	1.2	0.8	9226		1
Cetardiodactyla	Bovidae	Ovis orientalis	Asiatic mouflon	HLoviOri1	469796	GCA_014523465.1	INSTITUTE OF ZOOLOGY, CHINESE ACADEMY OF SCIENCES	42163491	103690580	17699	658	73	286	372	7	2	17699	60	0	4		99.8	54.4	45.4	0.1	0.1	9226		1		1
Cetardiodactyla	Cervidae	Cervus elaphus	red deer	HLcerEla2	9860	GCA_910594005.1	WELLCOME SANGER INSTITUTE	68741660	83473711	17653	683	94	293	390	9	11	17653	70	0	4		98.3	57.1	41.2	0.3	1.4	9226		1
Cetardiodactyla	Bovidae	Bos taurus	cattle	bosTau9	9913	GCA_002263795.2	USDA ARS	25896116	103308737	17574	788	68	267	521	12	1	17574	54	0	1		99.7	54.3	45.4	0.1	0.2	9226			1		1
Cetardiodactyla	Bovidae	Capra hircus	goat	HLcapHir2	9925	GCA_001704415.1	USDA ARS	26244591	87277232	17449	851	130	281	570	11	0	17449	117	0	2		99.6	54.4	45.2	0.2	0.2	9226			1		1
Cetardiodactyla	Cervidae	Muntiacus reevesi	Reeves' muntjac	HLmunRee2	9886	GCA_020226045.1	Northwestern Polytechnical University	18600000	113316579	17376	973	81	327	646	9	8	17376	63	0	1		97.1	56.4	40.7	0.7	2.2	9226					1
Cetardiodactyla	Suidae	Phacochoerus africanus	Common warthog	HLphaAfr1	41426	GCA_016906955.1	The Roslin Institute	10602503	141887063	17275	1069	86	328	741	15	13	17275	54	1	3		99.8	54.5	45.3	0.1	0.1	9226				1	1
Cetardiodactyla	Camelidae	Vicugna vicugna mensalis	vicugna	HLvicVicMen1	273917	GCA_013265495.1	Shanxi Agricultural University	340839	6158010	17246	838	346	282	556	56	14	17246	269	0	7		99.6	54.3	45.3	0.1	0.3	9226		1		1
Cetardiodactyla	Moschidae	Moschus berezovskii	Chinese forest musk deer	HLmosBer2	68408			39448	102122392	17180	889	361	322	567	86	22	17180	248	0	5		97.3	56.6	40.7	0.7	2	9226		1	1	1
Cetardiodactyla	Moschidae	Moschus moschiferus	Siberian musk deer	HLmosMos1	68415	GCA_004024705.2	Broad Institute	34785	11728851	17176	773	481	385	388	99	5	17176	375	0	2		99.3	54.3	45	0.3	0.4	9226		1
Cetardiodactyla	Giraffidae	Giraffa camelopardalis antiquorum	Kordofan giraffe	HLgirCamAnt3	439324	GCA_018282235.1	Senckenberg Nature Research Society	228443	27504022	17112	778	540	345	433	115	21	17112	384	0	20		99.3	54.3	45	0.4	0.3	9226					1
Cetardiodactyla	Antilocapridae	Antilocapra americana	pronghorn	HLantAme1	9891	GCA_007570785.1	Canada's Genomic Enterprise	220431	18739554	17039	923	468	417	506	77	0	17039	379	0	12		99.3	54.2	45.1	0.3	0.4	9226		1	1	1
Cetardiodactyla	Hippopotamidae	Hippopotamus amphibius	hippopotamus	HLhipAmp3	9833	GCA_004027065.2	Broad Institute	76609	4444377	16912	678	840	296	382	128	3	16912	705	0	4		99	54.1	44.9	0.5	0.5	9226			1		1
Cetardiodactyla	Cervidae	Muntiacus reevesi	Reeves' muntjac	HLmunRee1	9886	GCA_008787405.1	University of California, Berkeley	225142	94101870	16920	803	707	377	426	145	5	16920	553	0	4		98.7	54	44.7	0.6	0.7	9226			1		1
Cetardiodactyla	Cervidae	Muntiacus muntjak	muntjak	HLmunMun1	9888	GCA_008782695.1	University of California, Berkeley	215534	682452208	16840	853	737	399	454	138	4	16840	586	0	9		98.9	54.1	44.8	0.6	0.5	9226			1	1	1
Cetardiodactyla	Tayassuidae	Catagonus wagneri	Chacoan peccary	HLcatWag1	51154	GCA_004024745.2	Broad Institute	65965	19204659	16852	858	720	428	430	115	5	16852	582	0	18		99.3	54.2	45.1	0.3	0.4	9226		1	1	1
Cetardiodactyla	Bovidae	Bubalus bubalis	water buffalo	HLbubBub2	89462	GCA_003121395.1	University of Adelaide	22441509	117219835	16677	1695	58	316	1379	8	1	16677	48	0	1		99.7	54.4	45.3	0.1	0.2	9226		1		1
Cetardiodactyla	Tragulidae	Tragulus javanicus	Java mouse-deer	HLtraJav1	9849	GCA_004024965.2	Broad Institute	80230	14082842	16605	995	830	506	489	153	11	16605	646	0	20		98.8	53.9	44.9	0.6	0.6	9226		1	1	1
Cetardiodactyla	Delphinidae	Tursiops truncatus	common bottlenose dolphin	HLturTru4	9739	GCA_011762595.1	Vertebrate Genomes Project	9729386	108430135	16558	1737	135	1064	673	33	2	16558	80	0	20		98.9	53.9	45	0.3	0.8	9226					1
Cetardiodactyla	Camelidae	Camelus ferus	Wild Bactrian camel	HLcamFer3	419612	GCA_009834535.1	The Bactrian Camels Genome Sequencing and Analysis Consortium	5365398	76025729	16296	1888	246	400	1488	75	9	16296	155	0	7		99.2	54.1	45.1	0.2	0.6	9226		1
Cetardiodactyla	Cervidae	Muntiacus gongshanensis	Gongshanensis muntjac	HLmunGon1	145526	GCA_020226025.1	Northwestern Polytechnical University	24226309	24473636	16365	1662	403	740	922	194	25	16365	65	0	119		90.7	53	37.7	1.2	8.1	9226			1	1	1
Eulipotyphla	Talpidae	Talpa occidentalis	Iberian mole	HLtalOcc1	50954	GCA_014898055.1	Max Planck Institute for Molecular Genetics	2611709	119847213	16711	1483	236	514	969	44	4	16711	148	0	40		99.1	53.1	46	0.2	0.7	9226		1	1	1	1
Eulipotyphla	Solenodontidae	Solenodon paradoxus	Hispaniolan solenodon	HLsolPar1	79805	GCA_004363575.1	Broad Institute	236847	407682	16285	1131	1014	560	571	126	76	16285	685	0	127		98.3	53.8	44.5	0.6	1.1	9226		1	1	1	1
Lagomorpha	Ochotonidae	Ochotona curzoniae	black-lipped pika	HLochCur1	130825	GCA_017591425.1	National Institute of Biological Sciences, Beijing	29562832	33876933	17163	1036	231	627	409	44	22	17163	61	0	104		99.3	50.9	48.4	0.1	0.6	9226		1	1	1	1
Lagomorpha	Leporidae	Oryctolagus cuniculus cuniculus	rabbit	HLoryCunCun4	568996	GCA_013371645.1	Uppsala University	1879078	140390130	16079	2118	233	513	1605	52	9	16079	142	0	30		99.1	53.1	46	0.3	0.6	9226		1	1	1	1
Perissodactyla	Equidae	Equus caballus	horse	equCab3	9796	GCA_002863925.1	University of Louisville	1502753	87230776	17813	501	116	138	363	16	2	17813	95	0	3		99.7	54	45.7	0.1	0.2	9226		1	1	1	1
Perissodactyla	Rhinocerotidae	Diceros bicornis	black rhinoceros	HLdicBic1	9805	GCA_004027315.2	Broad Institute	91002	14664201	17238	626	566	220	406	83	3	17238	480	0	0		99.4	54.3	45.1	0.3	0.3	9226		1	1	1	1
Perissodactyla	Tapiridae	Tapirus indicus	Asiatic tapir	HLtapInd1	9802	GCA_004024905.1	Broad Institute	225792	308930	17123	549	758	183	366	53	35	17123	655	0	15		98.5	54.2	44.3	0.9	0.6	9226		1	1	1	1
Perissodactyla	Equidae	Equus zebra	mountain zebra	HLequZeb1	9791			182436	150600390	17053	587	790	222	365	151	21	17053	612	0	6		98.5	52.4	46.1	0.8	0.7	9226		1	1	1	1
Perissodactyla	Rhinocerotidae	Rhinoceros unicornis	greater Indian rhinoceros	HLrhiUni1	9809		DNA Zoo Consortium	105321	56870999	16468	734	1228	259	475	110	3	16468	1112	0	3		97	50.8	46.2	1.7	1.3	9226		1	1	1	1
Perissodactyla	Equidae	Equus asinus	ass	HLequAsi3	9793	GCA_016077325.1	Dairy Cattle Research Center, Shandong Academy of Agricultural Sciences	25075547	98598843	16229	2079	122	257	1822	11	5	16229	104	0	2		99.5	54.4	45.1	0.2	0.3	9226		1	1	1	1
Pholidota	Manidae	Manis pentadactyla	Chinese pangolin	HLmanPen2	143292	GCA_014570555.1	Yunnan University	151937	7836868	16798	1312	320	687	625	125	14	16798	131	0	50		98.4	53.4	45	0.3	1.3	9226		1	1	1	1
Pholidota	Manidae	Manis javanica	Malayan pangolin	HLmanJav2	9974	GCA_014570535.1	Yunnan University	83964	13854118	15777	1489	1164	726	763	148	12	15777	990	0	14		97.4	52.8	44.6	1.1	1.5	9226		1	1	1	1
Primates	Hominidae	Homo sapiens	human	hg38	9606	GCA_000001405.27	Genome Reference Consortium	56413054	59364414	18430	0	0	0	0	0	0	18430	0	0	0		na	na	na	na	na	na		1	1	1	1
Primates	Hominidae	Pan troglodytes	chimpanzee	panTro6	9598	GCA_002880755.3	University of Washington	12268567	53103722	18051	285	94	73	212	25	0	18051	66	0	3		99.5	53.8	45.7	0.1	0.4	9226					1
Primates	Hominidae	Pan paniscus	pygmy chimpanzee	panPan3	9597	GCA_013052645.1	University of Washington, University of Bari, Italy	16579680	68246502	18036	253	141	75	178	54	3	18036	82	0	2		99.2	53.3	45.9	0.2	0.6	9226					1
Primates	Cercopithecidae	Macaca mulatta	Rhesus monkey	rheMac10	9544	GCA_003339765.3	The Genome Institute at Washington University School of Medicine	46608966	82346004	18074	315	41	90	225	6	0	18074	35	0	0		99.8	53.5	46.3	0.1	0.1	9226		1	1	1
Primates	Hylobatidae	Nomascus leucogenys	northern white-cheeked gibbon	HLnomLeu4	61853	GCA_006542625.1	University of Washington	12782853	35886894	17913	435	82	166	269	16	2	17913	60	0	4		99.5	53.2	46.3	0.1	0.4	9226			1	1	1
Primates	Hominidae	Pongo abelii	Sumatran orangutan	ponAbe3	9601	GCA_002880775.3	University of Washington	11074009	98475126	17869	508	53	136	372	13	0	17869	39	0	1		99.6	53.8	45.8	0.1	0.3	9226		1	1	1
Primates	Cercopithecidae	Rhinopithecus roxellana	golden snub-nosed monkey	HLrhiRox2	61622	GCA_007565055.1	Northwest University	5723610	144559847	17612	693	125	149	544	12	1	17612	112	0	0		0	0	0	0	100	9226			1		1
Primates	Cercopithecidae	Cercopithecus mona	Mona monkey	HLcerMon1	36226	GCA_014849445.1	Kunming Institute of Zoology, Chinese Academy of Sciences	22791723	22791723	17568	517	345	199	318	153	13	17568	92	0	87		97.9	52.7	45.2	0.2	1.9	9226		1
Primates	Hominidae	Gorilla gorilla gorilla	western lowland gorilla	gorGor6	9595	GCA_008122165.1	University of Washington	9522971	26116462	17403	429	598	165	264	355	14	17403	220	0	9		96.4	52.3	44.1	0.6	3	9226		1
Primates	Cebidae	Callithrix jacchus	white-tufted-ear marmoset	HLcalJac4	9483	GCA_011100555.1	Vertebrate Genomes Project	13255626	136971485	17648	697	85	188	509	16	1	17648	67	0	1		99.5	53.3	46.2	0.1	0.4	9226			1	1
Primates	Cebidae	Saimiri boliviensis boliviensis	Bolivian squirrel monkey	HLsaiBolBol2	39432	GCA_016699345.1	Baylor College of Medicine Human Genome Sequencing Center	4857773	87238321	17414	918	98	170	748	16	0	17414	73	0	9		99.6	53.5	46.1	0.1	0.3	9226					1
Primates	Cercopithecidae	Papio anubis	olive baboon	HLpapAnu5	9555	GCA_008728515.1	University of California, San Francisco	1464978	140274886	17235	883	312	285	598	114	12	17235	173	0	13		98.1	52.2	45.9	0.3	1.6	9226			1		1
Primates	Cercopithecidae	Macaca fuscata	Japanese macaque	HLmacFus1	9542			87996	149352196	17342	503	585	165	338	68	4	17342	513	0	0		98.8	53.3	45.5	0.6	0.6	9226			1		1
Primates	Cercopithecidae	Trachypithecus francoisi	Francois's langur	HLtraFra1	54180	GCA_009764315.1	INSTITUTE OF ZOOLOGY, CHINESE ACADEMY OF SCIENCES	16182741	130977661	17182	1076	172	236	840	80	1	17182	90	0	1		99	53.2	45.8	0.1	0.9	9226		1		1
Primates	Daubentoniidae	Daubentonia madagascariensis	aye-aye	HLdauMad1	31869	GCA_004027145.1	Broad Institute	298834	379919	17404	490	536	200	290	49	14	17404	470	0	3		99.1	54.2	44.9	0.5	0.4	9226		1
Primates	Cheirogaleidae	Microcebus murinus	gray mouse lemur	micMur3	30608	GCA_000165445.3	Baylor College of Medicine	210702	108171978	16789	1316	325	240	1076	16	4	16789	305	0	0		99.1	53.7	45.4	0.4	0.5	9226				1	1
Primates	Lemuridae	Prolemur simus	greater bamboo lemur	HLproSim1	1328070	GCA_003258685.1	Henry Doorly Zoo & Aquarium	47757	2710671	16764	623	1043	229	394	145	6	16764	890	0	2		98.9	53.9	45	0.6	0.5	9226		1	1
Primates	Lemuridae	Lemur catta	Ring-tailed lemur	HLlemCat1	9447	GCA_004024665.1	Broad Institute	158439	215715	16492	684	1254	285	399	82	61	16492	1096	0	15		96.8	53.2	43.6	1.6	1.6	9226				1	1
Primates	Galagidae	Otolemur garnettii	small-eared galago	otoGar3	30611	GCA_000181295.3	Broad Institute of MIT and Harvard, USA, Cambridge	27100	13852661	15787	705	1938	261	444	241	3	15787	1685	0	9		98.2	53.3	44.9	0.9	0.9	9226		1	1	1
Primates	Pitheciidae	Pithecia pithecia	white-faced saki	HLpitPit1	43777	GCA_004026645.1	Broad Institute	63292	83104	15546	729	2155	253	476	55	118	15546	1970	0	12		93.6	51.8	41.8	3	3.4	9226		1		1
Rodentia	Xerinae	Marmota monax	woodchuck	HLmarMon2	9995	GCA_014533835.1	Johns Hopkins University	1094236	1094236	17458	628	344	223	405	4	19	17458	317	0	4		99	53.6	45.4	0.6	0.4	9226		1
Rodentia	Sciurinae	Sciurus vulgaris	Eurasian red squirrel	HLsciVul1	55149	GCA_902686455.1	SC	16333633	153872958	17254	1109	67	290	819	8	1	17254	58	0	0		99.8	54.2	45.6	0	0.2	9226				1	1
Rodentia	Muridae	Mus musculus	house mouse	mm10	10090	GCA_000001635.2	Genome Reference Consortium	32273079	52589046	17253	954	223	534	420	62	27	17253	73	0	61		99.7	54.6	45.1	0.1	0.2	9226			1		1
Rodentia	Muridae	Mastomys natalensis	African soft-furred rat	HLmasNat1	10112			19425943	167074384	17190	1041	199	571	470	69	4	17190	76	0	50		99.5	54.3	45.2	0.2	0.3	9226				1	1
Rodentia	Muridae	Arvicanthis niloticus	African grass rat	HLarvNil1	61156	GCA_011762505.1	Vertebrate Genomes Project	11143170	82689117	17149	1048	233	536	512	67	2	17149	118	0	46		99.3	53.8	45.5	0.1	0.6	9226		1	1	1
Rodentia	Muridae	Rattus norvegicus	Norway rat	HLratNor7	10116	GCA_015227675.1	Wellcome Sanger Institute	29198295	135012528	17118	1144	168	615	529	40	6	17118	65	0	57		99.6	54.6	45	0.1	0.3	9226		1
Rodentia	Cricetidae	Cricetulus griseus	Chinese hamster	HLcriGri3	10029	GCA_003668045.1	CHO Genome Community	2098530	19581774	17126	1071	233	514	557	51	9	17126	114	0	59		99.7	54.5	45.2	0.1	0.2	9226			1		1
Rodentia	Sciurinae	Sciurus carolinensis	gray squirrel	HLsciCar1	30640	GCA_902686445.1	SC	13975867	148229995	16859	1499	72	413	1086	12	1	16859	59	0	0		99.8	54.5	45.3	0	0.2	9226			1		1
Rodentia	Erethizontidae	Erethizon dorsatum	North American porcupine	HLereDor1	34844	GCA_006547115.1	Canada's Genomic Enterprise	118744	16680019	16879	1050	501	457	593	88	9	16879	390	0	14		99	54.1	44.9	0.4	0.6	9226		1	1	1
Rodentia	Cricetidae	Mesocricetus auratus	golden hamster	HLmesAur3	10036	GCA_017639785.1	Baylor College of Medicine Human Genome Sequencing Center	9471653	85184847	16859	1380	191	557	823	45	17	16859	68	0	61		99.8	54.5	45.3	0.1	0.1	9226		1
Rodentia	Muridae	Acomys russatus	golden spiny mouse	HLacoRus1	60746	GCA_903995435.1	SC	4450755	66475698	16826	1382	222	597	785	50	7	16826	115	0	50		99.3	54	45.3	0.2	0.5	9226		1	1	1
Rodentia	Hystricidae	Hystrix brachyura	-	HLhysBra1	143286	GCA_016801275.1	DNA Stories Bioinformatics Center	29439	2980431	16682	1188	560	423	765	145	45	16682	348	0	22		95.3	55.5	39.8	1	3.7	9226		1
Rodentia	Cricetidae	Microtus agrestis	short-tailed field vole	HLmicAgr2	29092	GCA_902806775.1	LIV	2938971	2938971	16686	1508	236	535	973	46	10	16686	110	0	70		99.4	54.1	45.3	0.2	0.4	9226					1
Rodentia	Cricetidae	Onychomys torridus	southern grasshopper mouse	HLonyTor1	38674	GCA_903995425.1	SC	2276141	112723509	16626	1358	446	604	754	123	5	16626	277	0	41		97.8	53.4	44.4	0.6	1.6	9226		1		1
Rodentia	Ctenodactylidae	Ctenodactylus gundi	northern gundi	HLcteGun1	10166	GCA_004027205.1	Broad Institute	218543	354548	16559	1191	680	728	463	107	35	16559	462	0	76		98.4	53.9	44.5	0.6	1	9226			1	1	1
Rodentia	Hydrochaeridae	Hydrochoerus hydrochaeris	capybara	HLhydHyd1	10149	GCA_004027455.1	Broad Institute	148451	202224	16377	1202	851	573	629	125	61	16377	570	0	95		98.3	54	44.3	0.7	1	9226					1
Rodentia	Caviidae	Cavia tschudii	Montane guinea pig	HLcavTsc1	143287	GCA_004027695.1	Broad Institute	64807	91436	16304	1102	1024	603	499	114	48	16304	756	0	106		97.6	53.6	44	0.9	1.5	9226		1		1
Rodentia	Dinomyidae	Dinomys branickii	pacarana	HLdinBra1	108858	GCA_004027595.1	Broad Institute	64805	77918	16166	1061	1203	508	553	137	77	16166	899	0	90		97.9	54.1	43.8	0.9	1.2	9226		1	1
Rodentia	Pedetidae	Pedetes capensis	springhare	HLpedCap1	10023	GCA_007922755.1	Broad Institute	54009	74432	16008	909	1513	461	448	103	90	16008	1276	0	44		97.1	53.5	43.6	1.3	1.6	9226			1	1	1
Rodentia	Dipodidae	Scarturus elater	small five-toed jerboa	HLallEla1	73861			20238462	20238462	15985	2224	221	779	1445	55	14	15985	66	0	86		99	53.9	45.1	0.2	0.8	9226			1	1	1
Afroteria	Chrysochlorinae	Chrysochloris asiatica	Cape golden mole	chrAsi1	185453	GCA_000296735.1	Broad Institute	19631	13470186	16263	870	1297	411	459	284	10	16263	973	0	30		98.6	53.8	44.8	0.7	0.7	9226		1	1	1	1
Afroteria	Procaviidae	Procavia capensis	Cape rock hyrax	HLproCap3	9813	GCA_004026925.2	Broad Institute	38095	9071062	16124	950	1356	509	441	193	19	16124	1117	0	27		98.2	53.9	44.3	0.8	1	9226		1	1	1	1
Afroteria	Elephantidae	Elephas maximus	Asiatic elephant	HLeleMax1	9783			57119	95956831	15844	796	1790	324	472	180	9	15844	1598	0	3		95.8	52.7	43.1	2.5	1.7	9226		1	1	1	1

## Sheet: SuppTable_6
Go to ––> _listAllTables
Supplementary Table 6.	Genes and branches with a statistically significant selection signal in a screen including 115 mammals.
		924	3447	2852	760	680	1515	588	2459	4158	3499			319																				253	87	112	192	255	99	129	347	234	238	265	284	371	302	341	150
NCBI Gene ID (https://www.ncbi.nlm.nih.gov/gene/)	geneSymbol	Afrotheria	Carnivora	Cetartiodactyla	Eulipotyphla	Lagomorpha	Perissodactyla	Pholidota	Primates	Rodentia	Chiroptera	nGroups_withSel_atLeast_1branch	geneSymbol	Sig_enrich_SARS	SARS_annotation	geneSymbol	Description	Biological Process (GO)	Cellular Component (GO)	Molecular Function (GO)	Gene Summary	Tissue Specificity (TiGER)	KEGG Pathway	Protein Expression Normal (Protein Atlas)	RNA Tissue Category (Protein Atlas)	Gene Location	Protein Function (Protein Atlas)	Subcellular Location (Protein Atlas)	GOSlim (Ontology)	Human Phenotype Ontology (HPO)	Disease and gene associations (DisGeNET)	Disease Ontology (DO)	geneSymbol	Chiroptera	Bat_Yin	Bat_Yin4fMgRhRhHi	Bat_2fRhinosHippos	Bat_Rhinolophidae	Bat_Rhino5spp	Bat_RhinoSinAff	Bat_RhinoSedLucTri	Bat_RhinoLucTri	HLrhiAff2	HLrhiFer5	HLrhiLuc4	HLrhiSed2	HLrhiSin1	HLrhiTri2	Bat_Hipposideridae
1	A1BG	0	0	1	0	0	1	0	1	1	1	5	9	0		A1BG	alpha-1-B glycoprotein	GO:0008150 biological_process	GO:0031093 platelet alpha granule lumen;GO:0031091 platelet alpha granule;GO:1904813 ficolin-1-rich granule lumen	GO:0003674 molecular_function	The protein encoded by this gene is a plasma glycoprotein of unknown function. The protein shows sequence similarity to the variable regions of some immunoglobulin supergene family member proteins. [provided by RefSeq, Jul 2008]	liver		Positivity in plasma.; antibody: Moderate to strong dot-like cytoplasmic positivity was observed in most cells of the CNS, seminal vesicle and gall bladder. Positive in plasma. Remaining normal tissues were negative.	Distribution: Detected in single; Specificity: Tissue enriched	chr19:58353492-58345183	Predicted secreted proteins; Predicted intracellular proteins		[GO:0005575] cellular_component; [GO:0005576] extracellular region; [GO:0005615] extracellular space; [GO:0043226] organelle; [GO:0003674] molecular_function; [GO:0008150] biological_process; [GO:0031012] extracellular matrix; [GO:0030312] external encapsulating structure; [GO:0005622] intracellular anatomical structure; [GO:0005737] cytoplasm; [GO:0031410] cytoplasmic vesicle		Angiomyolipoma of kidney; Subependymal Giant Cell Astrocytoma; pathologic fistula; Truncus Arteriosus, Persistent; Lymphangioleiomyomatosis; Hepatocellular Adenoma; Cholesteatoma; Exanthema; Apnea; Hepatomegaly; Meningioma; Complete Trisomy 21 Syndrome; Down Syndrome; Human immunodeficiency virus (HIV) II infection category B1; Arthritis; Familial (FPAH); Amyotrophic Lateral Sclerosis; Epilepsy; …		A1BG	0	0	0	0	0	0	0	0	0	0	0	0	0	0	0	0
2	A2M	1	0	0	0	0	0	0	0	1	1	3	7	0		A2M	alpha-2-macroglobulin	GO:0001868 regulation of complement activation, lectin pathway;GO:0001869 negative regulation of complement activation, lectin pathway;GO:0010037 response to carbon dioxide	GO:0031093 platelet alpha granule lumen;GO:0031091 platelet alpha granule;GO:0072562 blood microparticle	GO:0019959 interleukin-8 binding;GO:0048403 brain-derived neurotrophic factor binding;GO:0019958 C-X-C chemokine binding	The protein encoded by this gene is a protease inhibitor and cytokine transporter. It uses a bait-and-trap mechanism to inhibit a broad spectrum of proteases, including trypsin, thrombin and collagenase. It can also inhibit inflammatory cytokines, and it thus disrupts inflammatory cascades. Mutations in this gene are a cause of alpha-2-macroglobulin deficiency. This gene is implicated in Alzheime…	liver	(hsa04610)Complement and coagulation cascades	antibody: Endothelial cells were strongly stained. Cytoplasmic positivity of weak to moderate intensity was observed in squamous epithelia, hepatocytes and Purkinje cells. Remaining normal tissues were in general negative.; Extracellular positivity, mainly in plasma.	Distribution: Detected in all; Specificity: Tissue enhanced	chr12:9116229-9067708	Predicted secreted proteins; Candidate cardiovascular disease genes; Cancer-related genes:Candidate cancer biomarkers		[GO:0005575] cellular_component; [GO:0005576] extracellular region; [GO:0005615] extracellular space; [GO:0003674] molecular_function; [GO:0030234] enzyme regulator activity; [GO:0008150] biological_process; [GO:0019899] enzyme binding; [GO:0043226] organelle; [GO:0031012] extracellular matrix; [GO:0030312] external encapsulating structure; [GO:0005622] intracellular anatomical structure; [GO:000…		alpha-2-Macroglobulin Deficiency; ALZHEIMER DISEASE, SUSCEPTIBILITY TO; Fecal peritonitis; Embolism, Paradoxical; Decreased level of GABA in serum; Femur Head Necrosis; Fetal Resorption; Other specified peritonitis; Long-tract signs; Urethral intrinsic sphincter deficiency; Argyrophilic grain disease; Neurofibrillary degeneration (morphologic abnormality); Trypanosomiasis; Encephalomyelitis, Acut…		A2M	1	0	0	0	1	0	0	0	0	0	0	0	0	0	0	0
9	NAT1	0	0	0	0	0	0	0	1	0	1	2	3	0		NAT1	N-acetyltransferase 1	GO:0006805 xenobiotic metabolic process;GO:0071466 cellular response to xenobiotic stimulus;GO:0009410 response to xenobiotic stimulus	GO:0005829 cytosol;GO:0005737 cytoplasm;GO:0005622 intracellular anatomical structure	GO:0004060 arylamine N-acetyltransferase activity;GO:0008080 N-acetyltransferase activity;GO:0016407 acetyltransferase activity	This gene is one of two arylamine N-acetyltransferase (NAT) genes in the human genome, and is orthologous to the mouse and rat Nat2 genes. The enzyme encoded by this gene catalyzes the transfer of an acetyl group from acetyl-CoA to various arylamine and hydrazine substrates. This enzyme helps metabolize drugs and other xenobiotics, and functions in folate catabolism. Multiple transcript variants …		(hsa00232)Caffeine metabolism; (hsa05204)Chemical carcinogenesis - DNA adducts; (hsa00983)Drug metabolism - other enzymes	Mainly cytoplasmic expression in several different tissue types.; antibody: Strong immunoreactivity was observed in gastric glands and astrocytes. Normal cells in general displayed weak to moderate cytoplasmic staining which in some cells was combined with nuclear positivity. Lymphoid tissue and a majority of cells in female genitalia were negative.	Distribution: Detected in many; Specificity: Low tissue specificity	chr8:18170419-18223689	Enzymes; Predicted intracellular proteins; ENZYME proteins:Transferases		[GO:0003674] molecular_function; [GO:0016746] acyltransferase activity; [GO:0005575] cellular_component; [GO:0005622] intracellular anatomical structure; [GO:0005737] cytoplasm; [GO:0005829] cytosol; [GO:0008150] biological_process		Environment-Related Malignant Neoplasm; Industrial Dermatosis; Dermatitis, Occupational; Autosome Abnormalities; Chromosome Aberrations; Fast acetylator due to N-acetyltransferase enzyme variant; Orofacial cleft; Cleft lip, isolated; Slow acetylator due to N-acetyltransferase enzyme variant; Node-positive breast cancer; Asthma, Occupational; Chronic Lymphocytic Leukemia/Small Lymphocytic Lymphoma…		NAT1	0	1	0	0	0	0	0	0	0	0	0	0	0	0	0	0
10	NAT2	0	0	0	0	0	0	0	0	0	1	1	2	0		NAT2	N-acetyltransferase 2	GO:0006805 xenobiotic metabolic process;GO:0071466 cellular response to xenobiotic stimulus;GO:0009410 response to xenobiotic stimulus	GO:0005829 cytosol;GO:0005737 cytoplasm;GO:0005622 intracellular anatomical structure	GO:0004060 arylamine N-acetyltransferase activity;GO:0008080 N-acetyltransferase activity;GO:0016407 acetyltransferase activity	This gene encodes an enzyme that functions to both activate and deactivate arylamine and hydrazine drugs and carcinogens. Polymorphisms in this gene are responsible for the N-acetylation polymorphism in which human populations segregate into rapid, intermediate, and slow acetylator phenotypes. Polymorphisms in this gene are also associated with higher incidences of cancer and drug toxicity. A sec…	liver	(hsa00232)Caffeine metabolism; (hsa05204)Chemical carcinogenesis - DNA adducts; (hsa00983)Drug metabolism - other enzymes	antibody: Most normal cells showed weak to moderate cytoplasmic staining in some cases combined with nuclear positivity. Breast, small intestine, renal tubules, hepatocytes and prostate were strongly stained. Squamous epithelia, bile ducts, renal glomeruli, lymphoid tissue and most cells in the CNS were negative.; Cytoplasmic expression in several different tissue types.	Distribution: Detected in some; Specificity: Group enriched	chr8:18386585-18401219	Enzymes; Predicted intracellular proteins; ENZYME proteins:Transferases; Cancer-related genes:Candidate cancer biomarkers		[GO:0003674] molecular_function; [GO:0016746] acyltransferase activity; [GO:0005575] cellular_component; [GO:0005622] intracellular anatomical structure; [GO:0005737] cytoplasm; [GO:0005829] cytosol; [GO:0008150] biological_process		CYP1A2 polymorphism; NAT1 polymorphism; Asbestos-Related Malignant Mesothelioma; NAT2 polymorphism; Malignant neoplasm of sigmoid colon; Industrial Dermatosis; Tuberculoma; Dermatitis, Occupational; Adult Brain Neoplasm; Fast acetylator due to N-acetyltransferase enzyme variant; Orofacial cleft; Cleft lip, isolated; Slow acetylator due to N-acetyltransferase enzyme variant; Influenza-like illness…		NAT2	0	1	0	0	0	0	0	0	0	0	0	0	0	0	0	0
12	SERPINA3	0	1	1	0	0	0	0	1	0	0	3	3	0		SERPINA3	serpin family A member 3	GO:0030277 maintenance of gastrointestinal epithelium;GO:0010669 epithelial structure maintenance;GO:0006953 acute-phase response	GO:0031093 platelet alpha granule lumen;GO:0031091 platelet alpha granule;GO:0035578 azurophil granule lumen	GO:0004867 serine-type endopeptidase inhibitor activity;GO:0004866 endopeptidase inhibitor activity;GO:0030414 peptidase inhibitor activity	The protein encoded by this gene is a member of the serpin family of proteins, a group of proteins that inhibit serine proteases. This gene is one in a cluster of serpin genes located on the q arm of chromosome 14. Polymorphisms in this protein appear to be tissue specific and influence protease targeting. Variations in this protein's sequence have been implicated in Alzheimer's disease, and defi…	liver		antibody: Strong cytoplasmic and secreted positivity was mainly observed in a subset of hematopoietic cells, trophoblastic cells, lymphoid cells and cervical glandular cells. Remaining normal tissues were mostly negative.; Positivity in extracellular deposits and cytoplasmic expression in a few cell types.	Distribution: Detected in all; Specificity: Group enriched	chr14:94612391-94624053	Predicted secreted proteins; Predicted intracellular proteins; Candidate cardiovascular disease genes; Cancer-related genes:Candidate cancer biomarkers		[GO:0005575] cellular_component; [GO:0005576] extracellular region; [GO:0005615] extracellular space; [GO:0003674] molecular_function; [GO:0030234] enzyme regulator activity; [GO:0005622] intracellular anatomical structure; [GO:0043226] organelle; [GO:0005634] nucleus; [GO:0008150] biological_process; [GO:0003677] DNA binding; [GO:0006629] lipid metabolic process; [GO:0006950] response to stress;…		ANTICHYMOTRYPSIN BOCHUM 1 PHENOTYPE; Cholinergic urticaria; Urticaria due to cold; Whooping cough due to unspecified organism; Stage IIA Colon Cancer AJCC v7; Stage IIA Colon Cancer AJCC v8; malignant neoplasm of large intestine stage IIa; Chronic congestive heart failure; Microspherocytosis; Urethral intrinsic sphincter deficiency; ALZHEIMER DISEASE 2; Pertussis; Traveler's diarrhea; Spermatic C…		SERPINA3	0	0	0	0	0	0	0	0	0	0	0	0	0	0	0	0
15	AANAT	1	1	0	0	1	0	0	1	0	1	5	6	0		AANAT	aralkylamine N-acetyltransferase	GO:0030186 melatonin metabolic process;GO:0030187 melatonin biosynthetic process;GO:0046219 indolalkylamine biosynthetic process	GO:0048471 perinuclear region of cytoplasm;GO:0005829 cytosol;GO:0005737 cytoplasm	GO:0004059 aralkylamine N-acetyltransferase activity;GO:0004060 arylamine N-acetyltransferase activity;GO:0071889 14-3-3 protein binding	The protein encoded by this gene belongs to the acetyltransferase superfamily. It is the penultimate enzyme in melatonin synthesis and controls the night/day rhythm in melatonin production in the vertebrate pineal gland. Melatonin is essential for the function of the circadian clock that influences activity and sleep. This enzyme is regulated by cAMP-dependent phosphorylation that promotes its in…		(hsa00380)Tryptophan metabolism; (hsa01100)Metabolic pathways		Distribution: Detected in some; Specificity: Tissue enhanced	chr17:76453351-76470797	Enzymes; Predicted intracellular proteins; ENZYME proteins:Transferases; Human disease related genes:Nervous system diseases:Other nervous and sensory system diseases	Cytosol (Supported)	[GO:0003674] molecular_function; [GO:0016746] acyltransferase activity; [GO:0005575] cellular_component; [GO:0005622] intracellular anatomical structure; [GO:0005737] cytoplasm; [GO:0005829] cytosol; [GO:0008150] biological_process; [GO:0006464] cellular protein modification process; [GO:0051604] protein maturation; [GO:0009058] biosynthetic process; [GO:0034641] cellular nitrogen compound metabo…		Non-24 Hour Sleep-Wake Disorder; Nonorganic Sleep Wake Cycle Disorders; Shift-Work Sleep Disorder; Sleep Disorders, Circadian Rhythm; Advanced Sleep Phase Syndrome; Delayed Sleep Phase Syndrome; Melatonin deficiency; Adrenal cortical hypofunction; Adrenal gland hypofunction; Depression, Bipolar; Reticulocyte count (procedure); Androgen-Insensitivity Syndrome; Lichen Planus, Oral; Cholestasis; Dia…		AANAT	0	0	0	1	0	0	0	0	0	0	0	0	0	0	0	0
16	AARS1	0	1	1	0	0	1	0	0	0	1	4	6	0		AARS1	alanyl-tRNA synthetase 1	GO:0140018 regulation of cytoplasmic translational fidelity;GO:0006419 alanyl-tRNA aminoacylation;GO:1900247 regulation of cytoplasmic translational elongation	GO:0005739 mitochondrion;GO:0070062 extracellular exosome;GO:1903561 extracellular vesicle	GO:0002196 Ser-tRNA(Ala) hydrolase activity;GO:0004813 alanine-tRNA ligase activity;GO:0002161 aminoacyl-tRNA editing activity	The human alanyl-tRNA synthetase (AARS) belongs to a family of tRNA synthases, of the class II enzymes. Class II tRNA synthases evolved early in evolution and are highly conserved. This is reflected by the fact that 498 of the 968-residue polypeptide human AARS shares 41% identity witht the E.coli protein. tRNA synthases are the enzymes that interpret the RNA code and attach specific aminoacids t…		(hsa00970)Aminoacyl-tRNA biosynthesis	antibody: Most normal tissues showed moderate cytoplasmic positivity. Intestinal glands, exocrine pancreas, seminal vesicles and testis were strongly stained. Glial cells and muscle cells were weakly stained or negative.; Ubiquitous cytoplasmic expression.	Distribution: Detected in all; Specificity: Low tissue specificity	chr16:70289509-70252295	ENZYME proteins:Ligase; Human disease related genes:Nervous system diseases:Epilepsy; Predicted intracellular proteins; Disease related genes; Potential drug targets; Enzymes; Human disease related genes:Nervous system diseases:Neurodegenerative diseases	Cytosol (Supported)	[GO:0003674] molecular_function; [GO:0043167] ion binding; [GO:0005575] cellular_component; [GO:0005622] intracellular anatomical structure; [GO:0005737] cytoplasm; [GO:0016874] ligase activity; [GO:0008150] biological_process; [GO:0044281] small molecule metabolic process; [GO:0006520] cellular amino acid metabolic process; [GO:0034641] cellular nitrogen compound metabolic process; [GO:0006399] …	HP:0000643:Blepharospasm; HP:0010844:EEG with multifocal slow activity; HP:0001765:Hammertoe; HP:0003429:CNS hypomyelination; HP:0012447:Abnormal myelination; HP:0003431:Decreased motor nerve conduction velocity; HP:0002509:Limb hypertonia; HP:0000546:Retinal degeneration; HP:0200134:Epileptic encephalopathy; HP:0009027:Foot dorsiflexor weakness; HP:0000504:Abnormality of vision; HP:0001273:Abnor…	EPILEPTIC ENCEPHALOPATHY, EARLY INFANTILE, 29; Charcot-Marie-Tooth Disease, Axonal, Type 2n; Hereditary Diffuse Leukoencephalopathy with Spheroids; CNS hypomyelination; Decreased motor nerve conduction velocity; EEG with multifocal slow activity; Blepharospasm; Hammer Toe; Hereditary Motor and Sensory-Neuropathy Type II; Abnormal myelination; Peripheral motor neuropathy; Abnormal corpus callosum …	DOID:0110177 Charcot-Marie-Tooth disease axonal type 2N;DOID:0080451 developmental and epileptic encephalopathy 29	AARS1	0	0	0	0	0	0	0	0	0	0	0	0	0	0	0	0
18	ABAT	0	1	0	0	0	1	0	1	0	1	4	4	0		ABAT	4-aminobutyrate aminotransferase	GO:1902722 positive regulation of prolactin secretion;GO:0009450 gamma-aminobutyric acid catabolic process;GO:1904448 regulation of aspartate secretion	GO:0032144 4-aminobutyrate transaminase complex;GO:0005759 mitochondrial matrix;GO:0140535 intracellular protein-containing complex	GO:0003867 4-aminobutyrate transaminase activity;GO:0032145 succinate-semialdehyde dehydrogenase binding;GO:0034386 4-aminobutyrate:2-oxoglutarate transaminase activity	4-aminobutyrate aminotransferase (ABAT) is responsible for catabolism of gamma-aminobutyric acid (GABA), an important, mostly inhibitory neurotransmitter in the central nervous system, into succinic semialdehyde. The active enzyme is a homodimer of 50-kD subunits complexed to pyridoxal-5-phosphate. The protein sequence is over 95% similar to the pig protein. GABA is estimated to be present in nea…	liver	(hsa00650)Butanoate metabolism; (hsa00410)beta-Alanine metabolism; (hsa00640)Propanoate metabolism	Granular cytoplasmic expression in a subset of tissues.; antibody: Airway epithelia, hepatocytes, pancreas, endocrine glands, renal tubules, prostate and cells in CNS exhibited moderate to strong granular cytoplasmic positivity. Remaining normal tissues were weakly stained or negative.	Distribution: Detected in all; Specificity: Tissue enhanced	chr16:8674617-8784570	FDA approved drug targets:Small molecule drugs; Human disease related genes:Congenital disorders of metabolism:Congenital disorders of amino acid metabolism; Disease related genes; Enzymes; Predicted intracellular proteins; ENZYME proteins:Transferases	Mitochondria (Supported)	[GO:0003674] molecular_function; [GO:0043167] ion binding; [GO:0008150] biological_process; [GO:0044281] small molecule metabolic process; [GO:0006520] cellular amino acid metabolic process; [GO:0005575] cellular_component; [GO:0005622] intracellular anatomical structure; [GO:0005737] cytoplasm; [GO:0043226] organelle; [GO:0005739] mitochondrion; [GO:0009056] catabolic process; [GO:0019899] enzym…	HP:0025430:High-pitched cry; HP:0007291:Posterior fossa cyst; HP:0003819:Death in childhood; HP:0000098:Tall stature; HP:0025356:Psychomotor retardation; HP:0006829:Severe muscular hypotonia; HP:0002415:Leukodystrophy; HP:0001321:Cerebellar hypoplasia; HP:0000278:Retrognathia; HP:0001254:Lethargy; HP:0001274:Agenesis of corpus callosum; HP:0000494:Downslanted palpebral fissures; HP:0001347:Hyperr…	Gamma aminobutyric acid transaminase deficiency; Jeavons syndrome; Epilepsy, Reflex; Abnormal Deep Tendon Reflex; Bulbocavernosus Reflex, Decreased; Bulbocavernousus Reflex Absent; High pitched cry; Hoffman's Reflex; Reflex, Acoustic, Abnormal; Reflex, Anal, Absent; Reflex, Anal, Decreased; Reflex, Ankle, Abnormal; Reflex, Ankle, Decreased; Reflex, Biceps, Abnormal; Reflex, Biceps, Absent; Reflex…	DOID:0060174 GABA aminotransferase deficiency	ABAT	0	0	0	0	0	0	0	0	0	0	0	0	0	0	0	0
20	ABCA2	1	0	0	0	0	0	0	1	0	0	2	2	0		ABCA2	ATP binding cassette subfamily A member 2	GO:0150110 negative regulation of cholesterol esterification;GO:0099040 ceramide translocation;GO:0032805 positive regulation of low-density lipoprotein particle receptor catabolic process	GO:0043190 ATP-binding cassette (ABC) transporter complex;GO:0098533 ATPase dependent transmembrane transport complex;GO:1902495 transmembrane transporter complex	GO:0099038 ceramide floppase activity;GO:0046623 sphingolipid floppase activity;GO:0140328 floppase activity	The membrane-associated protein encoded by this gene is a member of the superfamily of ATP-binding cassette (ABC) transporters. ABC proteins transport various molecules across extra- and intracellular membranes. ABC genes are divided into seven distinct subfamilies (ABC1, MDR/TAP, MRP, ALD, OABP, GCN20, White). This protein is a member of the ABC1 subfamily. Members of the ABC1 subfamily comprise…		(hsa02010)ABC transporters; (hsa04142)Lysosome	Ubiquitous cytoplasmic and nuclear expression.; antibody: Most normal tissues showed moderate to strong cytoplasmic and/or nuclear positivity.	Distribution: Detected in many; Specificity: Tissue enriched	chr9:137028922-137007234	Human disease related genes:Other diseases:Mental and behavioural disorders; Disease related genes; Potential drug targets; Transporters:Primary Active Transporters; Predicted intracellular proteins	Vesicles (Supported)	[GO:0005575] cellular_component; [GO:0003674] molecular_function; [GO:0043167] ion binding; [GO:0008150] biological_process; [GO:0006810] transport; [GO:0055085] transmembrane transport; [GO:0022857] transmembrane transporter activity; [GO:0016887] ATPase; [GO:0005622] intracellular anatomical structure; [GO:0005737] cytoplasm; [GO:0031410] cytoplasmic vesicle; [GO:0043226] organelle; [GO:0005768…	HP:0002286:Fair hair; HP:0003141:Increased LDL cholesterol concentration; HP:0002311:Incoordination; HP:0011342:Mild global developmental delay; HP:0000519:Developmental cataract; HP:0031936:Delayed ability to walk; HP:0002066:Gait ataxia; HP:0000718:Aggressive behavior; HP:0001324:Muscle weakness; HP:0001256:Intellectual disability, mild; HP:0001260:Dysarthria; HP:0000252:Microcephaly; HP:000125…	Developmental Coordination Disorder; Arteriovenous Malformations, Cerebral; Adverse effects, not elsewhere classified; Low grade glioma; Acoustic Neuroma; Congenital arteriovenous malformation; Alzheimer Disease, Early Onset; Neurilemmoma; Hyperlipoproteinemia Type IIa; Malignant neoplasm of brain; Meningioma, benign, no ICD-O subtype; Adult Meningioma; Cerebellar Ataxia; Neuropathy; Dysarthria; …		ABCA2	0	0	0	0	0	0	0	0	0	0	0	0	0	0	0	0
21	ABCA3	0	1	0	0	0	0	0	0	0	0	1	2	0		ABCA3	ATP binding cassette subfamily A member 3	GO:0032464 positive regulation of protein homooligomerization;GO:0032461 positive regulation of protein oligomerization;GO:0032462 regulation of protein homooligomerization	GO:0097233 alveolar lamellar body membrane;GO:0097232 lamellar body membrane;GO:0097208 alveolar lamellar body	GO:0120019 phosphatidylcholine transfer activity;GO:0140345 phosphatidylcholine flippase activity;GO:0008559 ABC-type xenobiotic transporter activity	The membrane-associated protein encoded by this gene is a member of the superfamily of ATP-binding cassette (ABC) transporters. ABC proteins transport various molecules across extra- and intracellular membranes. ABC genes are divided into seven distinct subfamilies (ABC1, MDR/TAP, MRP, ALD, OABP, GCN20, White). This protein is a member of the ABC1 subfamily. Members of the ABC1 subfamily comprise…	small_intestine	(hsa02010)ABC transporters	antibody: Moderate to strong cytoplasmic immunoreactivity with a granular pattern was observed in most normal tissues. Smooth muscle were negative.; High cytoplasmic expression in pneumocytes in lung. Also weaker cytoplasmic expression in several tissues as well.	Distribution: Detected in many; Specificity: Tissue enhanced	chr16:2340728-2275881	ENZYME proteins; Human disease related genes:Respiratory diseases:Lung diseases; Disease related genes; Potential drug targets; Enzymes; Transporters:Primary Active Transporters	Cytosol;Nucleoplasm (Approved)	[GO:0005575] cellular_component; [GO:0003674] molecular_function; [GO:0043167] ion binding; [GO:0008150] biological_process; [GO:0006810] transport; [GO:0055085] transmembrane transport; [GO:0022857] transmembrane transporter activity; [GO:0016887] ATPase; [GO:0005622] intracellular anatomical structure; [GO:0005737] cytoplasm; [GO:0031410] cytoplasmic vesicle; [GO:0043226] organelle; [GO:0005768…	HP:0033649:Paraseptal emphysema; HP:0033584:Nonspecific interstitial pneumonia; HP:0032980:Absent bronchoalveolar surfactant-protein C; HP:0033542:Bronchial wall thickening; HP:0030863:Nasal flaring; HP:0025392:Nodular pattern on pulmonary HRCT; HP:0025394:Cystic pattern on pulmonary HRCT; HP:0005942:Desquamative interstitial pneumonitis; HP:0025391:Crazy paving pattern; HP:0031950:Usual intersti…	Surfactant Metabolism Dysfunction, Pulmonary, 3; Chronic respiratory insufficiency; Lamellar ichthyosis, type 2; Chronic interstitial lung disease; Congenital Deficiency of Pulmonary Surfactant Protein B; RDS - infants; Alveolar capillary dysplasia; Neuroendocrine cell hyperplasia of infancy; Neonatal respiratory failure; Desquamative interstitial pneumonia; Cataract microcornea syndrome; Surfact…	DOID:12120 pulmonary alveolar proteinosis	ABCA3	0	0	0	0	0	0	0	0	0	0	0	0	0	0	0	0
22	ABCB7	0	0	0	0	0	0	0	0	0	1	1	1	0		ABCB7	ATP binding cassette subfamily B member 7	GO:0140466 iron-sulfur cluster export from the mitochondrion;GO:1902497 iron-sulfur cluster transmembrane transport;GO:1903329 regulation of iron-sulfur cluster assembly	GO:0005743 mitochondrial inner membrane;GO:0019866 organelle inner membrane;GO:0031966 mitochondrial membrane	GO:0140481 ABC-type iron-sulfur cluster transporter activity;GO:0015232 heme transmembrane transporter activity;GO:0140359 ABC-type transporter activity	The membrane-associated protein encoded by this gene is a member of the superfamily of ATP-binding cassette (ABC) transporters. ABC proteins transport various molecules across extra- and intra-cellular membranes. ABC genes are divided into seven distinct subfamilies (ABC1, MDR/TAP, MRP, ALD, OABP, GCN20, White). This protein is a member of the MDR/TAP subfamily. Members of the MDR/TAP subfamily a…		(hsa02010)ABC transporters	antibody: Most of the normal cells showed weak to moderate cytoplasmic positivity, often with a granular pattern and additional membranous staining in some cases. Alveolar cells, endothelial cells and smooth muscle cells displayed strong staining. Cells of the CNS, prostate and urothelium were negative. ; Distinct cytoplasmic and membranous expression in endothelium and smooth muscle.	Distribution: Detected in all; Specificity: Low tissue specificity	chrX:75156283-75051048	Human disease related genes:Cardiovascular diseases:Hematologic diseases; Disease related genes; Potential drug targets; Transporters:Primary Active Transporters; Predicted intracellular proteins	Mitochondria (Approved)	[GO:0005575] cellular_component; [GO:0003674] molecular_function; [GO:0043167] ion binding; [GO:0008150] biological_process; [GO:0006810] transport; [GO:0055085] transmembrane transport; [GO:0022857] transmembrane transporter activity; [GO:0016887] ATPase; [GO:0005622] intracellular anatomical structure; [GO:0005737] cytoplasm; [GO:0043226] organelle; [GO:0005739] mitochondrion; [GO:0042592] home…	HP:0002470:Nonprogressive cerebellar ataxia; HP:0001924:Sideroblastic anemia; HP:0004840:Hypochromic microcytic anemia; HP:0002075:Dysdiadochokinesis; HP:0002169:Clonus; HP:0002080:Intention tremor; HP:0001939:Abnormality of metabolism/homeostasis; HP:0002167:Neurological speech impairment; HP:0003621:Juvenile onset; HP:0001310:Dysmetria; HP:0001419:X-linked recessive inheritance; HP:0003487:Babi…	ANEMIA, SIDEROBLASTIC, AND SPINOCEREBELLAR ATAXIA; Congenital cerebellar ataxia; Nonprogressive cerebellar ataxia; Gangliosidosis GM1; Ataxia, Motor; X-linked sideroblastic anemia; Tremor, Rubral; Sideroblastic anemia; Microcytic hypochromic anemia (disorder); Ataxia, Sensory; Refractory anemia with ringed sideroblasts; Refractory anemia, without ringed sideroblasts, without excess blasts; Dysdia…	DOID:0050554 X-linked sideroblastic anemia with ataxia	ABCB7	0	0	0	0	0	0	0	0	0	0	0	0	1	0	0	0
23	ABCF1	0	1	0	0	0	1	0	1	0	1	4	5	0		ABCF1	ATP binding cassette subfamily F member 1	GO:0006412 translation;GO:0043043 peptide biosynthetic process;GO:0043604 amide biosynthetic process	GO:0005635 nuclear envelope;GO:0031967 organelle envelope;GO:0031975 envelope	GO:0008135 translation factor activity, RNA binding;GO:0090079 translation regulator activity, nucleic acid binding;GO:0045182 translation regulator activity	The protein encoded by this gene is a member of the superfamily of ATP-binding cassette (ABC) transporters. ABC proteins transport various molecules across extra- and intra-cellular membranes. ABC genes are divided into seven distinct subfamilies (ABC1, MDR/TAP, MRP, ALD, OABP, GCN20, White). This protein is a member of the GCN20 subfamily. Unlike other members of the superfamily, this protein la…			Cytoplasmic expression in most tissues.; antibody: Moderate cytoplasmic positivity was observed in most normal tissues. The gastrointestinal tract, gall and urinary bladder, prostate, trophoblastic cells of placenta and lymphoid tissues were strongly stained.	Distribution: Detected in all; Specificity: Tissue enhanced	chr6:30571442-30591522	Transporters:Primary Active Transporters; Predicted intracellular proteins	Cytosol (Enhanced)	[GO:0003674] molecular_function; [GO:0043167] ion binding; [GO:0003723] RNA binding; [GO:0005575] cellular_component; [GO:0005622] intracellular anatomical structure; [GO:0043226] organelle; [GO:0005634] nucleus; [GO:0005737] cytoplasm; [GO:0005829] cytosol; [GO:0005635] nuclear envelope; [GO:0005654] nucleoplasm; [GO:0008150] biological_process; [GO:0006950] response to stress; [GO:0009058] bios…		Influenza due to Influenza A virus subtype H1N1; Autoimmune pancreatitis; Experimental Lung Inflammation; Acute interstitial pneumonia; Hypersensitivity; Cytokine storm; Acute intermittent porphyria; Lobar Pneumonia; Disease Exacerbation; Allergic Reaction; Thyroid associated opthalmopathies; Myasthenia Gravis; Pancreatitis; Graves Disease; Pneumonitis; Pneumonia; Arthritis; Septicemia; Sepsis; D…		ABCF1	0	0	0	0	0	0	0	0	0	0	0	0	0	0	0	0
24	ABCA4	1	0	1	0	0	0	0	0	0	1	3	3	0		ABCA4	ATP binding cassette subfamily A member 4	GO:0006649 phospholipid transfer to membrane;GO:0034633 retinol transport;GO:0046864 isoprenoid transport	GO:0120202 rod photoreceptor disc membrane;GO:0097381 photoreceptor disc membrane;GO:0001750 photoreceptor outer segment	GO:0140347 N-retinylidene-phosphatidylethanolamine flippase activity;GO:0034632 retinol transmembrane transporter activity;GO:0015665 alcohol transmembrane transporter activity	The membrane-associated protein encoded by this gene is a member of the superfamily of ATP-binding cassette (ABC) transporters. ABC proteins transport various molecules across extra- and intracellular membranes. ABC genes are divided into seven distinct subfamilies (ABC1, MDR/TAP, MRP, ALD, OABP, GCN20, White). This protein is a member of the ABC1 subfamily. Members of the ABC1 subfamily comprise…	eye	(hsa02010)ABC transporters	Expression in photoreceptor cells in retina.	Distribution: Detected in some; Specificity: Group enriched	chr1:94121148-93992834	ENZYME proteins; Human disease related genes:Nervous system diseases:Eye disease; Disease related genes; Potential drug targets; Enzymes; Transporters:Primary Active Transporters	Cytosol (Approved)	[GO:0005575] cellular_component; [GO:0003674] molecular_function; [GO:0043167] ion binding; [GO:0008150] biological_process; [GO:0006810] transport; [GO:0055085] transmembrane transport; [GO:0005886] plasma membrane; [GO:0050877] nervous system process; [GO:0022857] transmembrane transporter activity; [GO:0016887] ATPase; [GO:0005622] intracellular anatomical structure; [GO:0005737] cytoplasm; [G…	HP:0008035:Retinitis pigmentosa inversa; HP:0030500:Yellow/white lesions of the macula; HP:0011504:Bull's eye maculopathy; HP:0011504:Bull's eye maculopathy; HP:0000493:Abnormal foveal morphology; HP:0008059:Aplasia/Hypoplasia of the macula; HP:0008002:Abnormality of macular pigmentation; HP:0000610:Abnormal choroid morphology; HP:0007984:Electronegative electroretinogram; HP:0007994:Peripheral v…	MACULAR DEGENERATION, AGE-RELATED, 2, SUSCEPTIBILITY TO; MANDIBULOFACIAL DYSOSTOSIS WITH MENTAL RETARDATION; RETINITIS PIGMENTOSA 19; Toxic maculopathy; Foveal atrophy; Macular Degeneration, Age-Related, 2; Retinal astrocytic hamartoma; Sectoral retinitis pigmentosa; CONE-ROD DYSTROPHY 3 (disorder); Stargardt disease 4; Retinitis pigmentosa inversa; Stargardt disease 3; Abnormal foveal morphology…	DOID:0110015 age related macular degeneration 2;DOID:0111013 cone-rod dystrophy 3;DOID:0110354 retinitis pigmentosa 19;DOID:0050817 Stargardt disease	ABCA4	0	0	0	0	0	0	0	0	0	0	0	0	0	0	0	0
26	AOC1	0	1	1	0	0	0	0	0	0	1	3	4	0		AOC1	amine oxidase copper containing 1	GO:0035874 cellular response to copper ion starvation;GO:0120126 response to copper ion starvation;GO:0097184 response to azide	GO:0035580 specific granule lumen;GO:0005923 bicellular tight junction;GO:0070160 tight junction	GO:0052597 diamine oxidase activity;GO:0052598 histamine oxidase activity;GO:0052599 methylputrescine oxidase activity	This gene encodes a metal-binding membrane glycoprotein that oxidatively deaminates putrescine, histamine, and related compounds. The encoded protein is inhibited by amiloride, a diuretic that acts by closing epithelial sodium ion channels. Alternatively spliced transcript variants encoding multiple isoforms have been observed for this gene. [provided by RefSeq, Jan 2013]	placenta	(hsa00340)Histidine metabolism; (hsa00380)Tryptophan metabolism; (hsa00330)Arginine and proline metabolism	Cytoplasmic and membranous expression in most cell types.; antibody: The majority of normal tissues showed moderate to strong cytoplasmic and membranous staining. Hepatocytes, skeletal myocytes and the CNS tissues except Purkinje cells were negative or weakly stained.	Distribution: Detected in many; Specificity: Group enriched	chr7:150824875-150861504	Enzymes; Predicted secreted proteins; ENZYME proteins:Oxidoreductases		[GO:0003674] molecular_function; [GO:0043167] ion binding; [GO:0016491] oxidoreductase activity; [GO:0008150] biological_process; [GO:0005575] cellular_component; [GO:0005886] plasma membrane; [GO:0005576] extracellular region; [GO:0005615] extracellular space; [GO:0005622] intracellular anatomical structure; [GO:0005737] cytoplasm; [GO:0043226] organelle; [GO:0005777] peroxisome; [GO:0031410] cy…		Histamine intolerance; Food Allergy; C-cell hyperplasia of thyroid; Clear Cell Sarcoma of Soft Tissue; Familial medullary thyroid carcinoma; CATARACT, MARNER TYPE; Obstructive azoospermia; Chronic small plaque psoriasis; Carpal Tunnel Syndrome; Cardiac Hypertrophy; Chronic idiopathic urticaria; Klinefelter's syndrome - male with more than two X chromosomes; Azoospermia, Nonobstructive; Hepatocell…		AOC1	0	0	0	0	0	0	0	0	0	0	0	0	0	0	0	0
29	ABR	0	1	0	0	0	0	0	0	0	0	1	1	0		ABR	ABR activator of RhoGEF and GTPase	GO:0090630 activation of GTPase activity;GO:0007264 small GTPase mediated signal transduction;GO:0043547 positive regulation of GTPase activity	GO:0098685 Schaffer collateral - CA1 synapse;GO:0043197 dendritic spine;GO:0044309 neuron spine	GO:0005085 guanyl-nucleotide exchange factor activity;GO:0005096 GTPase activator activity;GO:0030695 GTPase regulator activity	This gene encodes a protein that is similar to the protein encoded by the breakpoint cluster region gene located on chromosome 22. The protein encoded by this gene contains a GTPase-activating protein domain, a domain found in members of the Rho family of GTP-binding proteins. Functional studies in mice determined that this protein plays a role in vestibular morphogenesis. Alternatively spliced t…	blood		General cytoplasmic expression with a granular pattern in several tissues.	Distribution: Detected in many; Specificity: Low tissue specificity	chr17:1229722-1003519	Predicted intracellular proteins	Cytosol (Approved); Additional: Nucleoplasm	[GO:0008150] biological_process; [GO:0007165] signal transduction; [GO:0003674] molecular_function; [GO:0030234] enzyme regulator activity; [GO:0005575] cellular_component; [GO:0005622] intracellular anatomical structure; [GO:0005737] cytoplasm; [GO:0005829] cytosol; [GO:0007267] cell-cell signaling; [GO:0006464] cellular protein modification process; [GO:0016301] kinase activity		Tibial aplasia and ectrodactyly syndrome; Auditory Perceptual Disorders; Severe sensorineural hearing impairment; Juvenile Pilocytic Astrocytoma; Clostridium difficile infection; Hemophilia, NOS; Tinnitus; Acoustic Neuroma; Congenital ear anomaly NOS (disorder); Hemophilia A; Miller Dieker syndrome; Neuroectodermal Tumor, Primitive; Anaplastic astrocytoma; Skin Erosion; Rett Syndrome; Superficial…		ABR	0	0	0	0	0	0	0	0	0	0	0	0	0	0	0	0
30	ACAA1	0	0	1	0	0	0	0	0	0	1	2	2	0		ACAA1	acetyl-CoA acyltransferase 1	GO:0010124 phenylacetate catabolic process;GO:0036109 alpha-linolenic acid metabolic process;GO:0033540 fatty acid beta-oxidation using acyl-CoA oxidase	GO:0005782 peroxisomal matrix;GO:0031907 microbody lumen;GO:0035580 specific granule lumen	GO:0008775 acetate CoA-transferase activity;GO:0050633 acetyl-CoA C-myristoyltransferase activity;GO:0016401 palmitoyl-CoA oxidase activity	This gene encodes an enzyme operative in the beta-oxidation system of the peroxisomes. Deficiency of this enzyme leads to pseudo-Zellweger syndrome. Alternative splicing results in multiple transcript variants. [provided by RefSeq, Jul 2008]		(hsa00592)alpha-Linolenic acid metabolism; (hsa01040)Biosynthesis of unsaturated fatty acids; (hsa00071)Fatty acid degradation	antibody: Most normal tissues displayed weak to moderate cytoplasmic positivity, often with a granular pattern. Strong immunoreactivity was observed in hepatocytes and exocrine pancreas as well as in cilia of fallopian tube and airway epithelia. Squamous epithelia and lymphoid tissues were in general negative. ; Cytoplasmic expression in most glandular cells. Highest expression in hepatocytes, he…	Distribution: Detected in all; Specificity: Group enriched	chr3:38137127-38122710	Enzymes; FDA approved drug targets:Small molecule drugs; Predicted intracellular proteins; ENZYME proteins:Transferases	Peroxisomes (Supported)	[GO:0003674] molecular_function; [GO:0016746] acyltransferase activity; [GO:0005575] cellular_component; [GO:0008150] biological_process; [GO:0006629] lipid metabolic process; [GO:0044281] small molecule metabolic process; [GO:0009056] catabolic process; [GO:0005622] intracellular anatomical structure; [GO:0005737] cytoplasm; [GO:0043226] organelle; [GO:0005777] peroxisome; [GO:0005576] extracell…		Deficiency of acetyl-CoA acetyltransferase; Zellweger Spectrum; Ketosis; IgE-mediated allergic asthma; Carotid Atherosclerosis; Adrenoleukodystrophy; Childhood asthma; Allergic asthma; Diabetes Mellitus, Experimental; Lymphoma, Non-Hodgkin; Asthma; Diabetes Mellitus, Non-Insulin-Dependent; Malignant neoplasm of colon and/or rectum; Colorectal Carcinoma; Liver carcinoma		ACAA1	0	0	0	0	0	0	0	0	0	0	0	0	0	0	0	0
32	ACACB	0	1	0	0	0	0	0	0	1	0	2	2	0		ACACB	acetyl-CoA carboxylase beta	GO:2001295 malonyl-CoA biosynthetic process;GO:2001293 malonyl-CoA metabolic process;GO:0031999 negative regulation of fatty acid beta-oxidation	GO:0005741 mitochondrial outer membrane;GO:0031968 organelle outer membrane;GO:0019867 outer membrane	GO:0003989 acetyl-CoA carboxylase activity;GO:0009374 biotin binding;GO:0016421 CoA carboxylase activity	Acetyl-CoA carboxylase (ACC) is a complex multifunctional enzyme system. ACC is a biotin-containing enzyme which catalyzes the carboxylation of acetyl-CoA to malonyl-CoA, the rate-limiting step in fatty acid synthesis. ACC-beta is thought to control fatty acid oxidation by means of the ability of malonyl-CoA to inhibit carnitine-palmitoyl-CoA transferase I, the rate-limiting step in fatty acid up…	mammary_gland;soft_tissue	(hsa00061)Fatty acid biosynthesis; (hsa00640)Propanoate metabolism; (hsa00620)Pyruvate metabolism	antibody: Strong cytoplasmic and nuclear staining was displayed in adipocytes and spermatids. Moderate cytoplasmic positivity was observed in hepatocytes and glandular cells in thyroid gland and intestines. All other normal tissues were weakly stained or negative.; Cytoplasmic and nuclear expression in several tissues, most abundant in adipocytes.	Distribution: Detected in all; Specificity: Tissue enhanced	chr12:109112666-109268226	Enzymes; ENZYME proteins:Ligase; Predicted intracellular proteins		[GO:0003674] molecular_function; [GO:0043167] ion binding; [GO:0016874] ligase activity; [GO:0008150] biological_process; [GO:0009058] biosynthetic process; [GO:0044281] small molecule metabolic process; [GO:0006629] lipid metabolic process; [GO:0005575] cellular_component; [GO:0005622] intracellular anatomical structure; [GO:0043226] organelle; [GO:0005634] nucleus; [GO:0005737] cytoplasm; [GO:0…		Adenocarcinoma of salivary gland; Dental Plaque; Salivary gland carcinoma; Hypopharyngeal Cancer; Insulin Sensitivity; Malignant neoplasm of salivary gland; Fatty Liver, Alcoholic; Hypopharyngeal Carcinoma; Insulin Resistance; Pediatric Obesity; Obesity, Morbid; Necrotizing enterocolitis in fetus OR newborn; Adenoid Cystic Carcinoma; Aplasia Cutis Congenita; Acute Chest Syndrome; Hypercholesterol…		ACACB	0	0	0	0	0	0	0	0	0	0	0	0	0	0	0	0
34	ACADM	0	1	1	0	1	1	0	1	1	1	7	16	0		ACADM	acyl-CoA dehydrogenase medium chain	GO:0019254 carnitine metabolic process, CoA-linked;GO:0045329 carnitine biosynthetic process;GO:0051793 medium-chain fatty acid catabolic process	GO:0005759 mitochondrial matrix;GO:0030424 axon;GO:0031966 mitochondrial membrane	GO:0070991 medium-chain-acyl-CoA dehydrogenase activity;GO:0003995 acyl-CoA dehydrogenase activity;GO:0016627 oxidoreductase activity, acting on the CH-CH group of donors	This gene encodes the medium-chain specific (C4 to C12 straight chain) acyl-Coenzyme A dehydrogenase. The homotetramer enzyme catalyzes the initial step of the mitochondrial fatty acid beta-oxidation pathway. Defects in this gene cause medium-chain acyl-CoA dehydrogenase deficiency, a disease characterized by hepatic dysfunction, fasting hypoglycemia, and encephalopathy, which can result in infan…		(hsa00071)Fatty acid degradation; (hsa00280)Valine, leucine and isoleucine degradation; (hsa01212)Fatty acid metabolism	Ubiquitous cytoplasmic expression with a granular pattern.; antibody: Normal tissues generally displayed strong cytoplasmic staining with a granular pattern. Ciliated cells displayed additional positivity of luminal membranes. Squamous epithelia and cells of the CNS were weaker stained.	Distribution: Detected in all; Specificity: Tissue enhanced	chr1:75724709-75763679	ENZYME proteins:Oxidoreductases; Human disease related genes:Congenital disorders of metabolism:Congenital disorders of lipid/glycolipid metabolism; Human disease related genes:Congenital disorders of metabolism:Congenital disorders of amino acid metabolism; Disease related genes; Potential drug targets; Enzymes; Predicted intracellular proteins	Mitochondria (Enhanced)	[GO:0003674] molecular_function; [GO:0043167] ion binding; [GO:0016491] oxidoreductase activity; [GO:0005575] cellular_component; [GO:0005622] intracellular anatomical structure; [GO:0005737] cytoplasm; [GO:0043226] organelle; [GO:0005739] mitochondrion; [GO:0008150] biological_process; [GO:0006629] lipid metabolic process; [GO:0044281] small molecule metabolic process; [GO:0009056] catabolic pro…	HP:0008309:Medium chain dicarboxylic aciduria; HP:0040155:Elevated urinary 3-hydroxybutyric acid; HP:0011936:Decreased plasma total carnitine; HP:0003215:Dicarboxylic aciduria; HP:0030199:Fatigable weakness of neck muscles; HP:0003234:Decreased plasma carnitine; HP:0045040:Abnormal lactate dehydrogenase level; HP:0003108:Hyperglycinuria; HP:0005684:Distal arthrogryposis; HP:0007185:Loss of consci…	Elevated urinary 3-hydroxybutyric acid; Fatty acid oxidation disorder; Medium chain dicarboxylic aciduria; Decreased plasma total carnitine; Fatty acid oxidation defects; HYDROCEPHALUS, CONGENITAL, 2, WITH OR WITHOUT BRAIN OR EYE ANOMALIES; Reye-Like Syndrome; Reye Syndrome; Disorder of fatty acid metabolism; Dicarboxylic aciduria; Lactic acidemia; Fatigable weakness of neck muscles; Unconscious …	DOID:0080153 medium chain acyl-CoA dehydrogenase deficiency	ACADM	0	0	0	0	0	0	0	0	0	0	0	0	0	1	0	0
36	ACADSB	0	1	1	0	0	0	0	0	0	0	2	2	0		ACADSB	acyl-CoA dehydrogenase short/branched chain	GO:0006550 isoleucine catabolic process;GO:0006549 isoleucine metabolic process;GO:0009083 branched-chain amino acid catabolic process	GO:0005759 mitochondrial matrix;GO:0005739 mitochondrion;GO:0031974 membrane-enclosed lumen	GO:0003853 2-methylacyl-CoA dehydrogenase activity;GO:0016937 short-branched-chain-acyl-CoA dehydrogenase activity;GO:0047119 2-methyl-branched-chain-enoyl-CoA reductase activity	Short/branched chain acyl-CoA dehydrogenase(ACADSB) is a member of the acyl-CoA dehydrogenase family of enzymes that catalyze the dehydrogenation of acyl-CoA derivatives in the metabolism of fatty acids or branch chained amino acids. Substrate specificity is the primary characteristic used to define members of this gene family. The ACADSB gene product has the greatest activity towards the short b…	kidney;liver	(hsa00071)Fatty acid degradation; (hsa00280)Valine, leucine and isoleucine degradation; (hsa01212)Fatty acid metabolism	antibody: Endocrine glands, duodenum, renal tubules, bladder and Leydig cells showed strong cytoplasmic staining. Respiratory epithelia, gastrointestinal tract, hepatocytes, exocrine pancreas, breast, seminiferus duct cells and heart showed moderate positivity. Remaining normal tissues were weakly stained or negative.; Granular cytoplasmic expression in most tissues.	Distribution: Detected in all; Specificity: Tissue enhanced	chr10:123009006-123058290	ENZYME proteins:Oxidoreductases; Human disease related genes:Congenital disorders of metabolism:Congenital disorders of lipid/glycolipid metabolism; Disease related genes; Potential drug targets; Enzymes; Predicted intracellular proteins	Mitochondria (Supported)	[GO:0003674] molecular_function; [GO:0043167] ion binding; [GO:0016491] oxidoreductase activity; [GO:0005575] cellular_component; [GO:0005622] intracellular anatomical structure; [GO:0005737] cytoplasm; [GO:0043226] organelle; [GO:0005739] mitochondrion; [GO:0008150] biological_process; [GO:0006629] lipid metabolic process; [GO:0044281] small molecule metabolic process; [GO:0009056] catabolic pro…	HP:0005949:Apneic episodes in infancy; HP:0002045:Hypothermia; HP:0003700:Generalized amyotrophy; HP:0000577:Exotropia; HP:0001943:Hypoglycemia; HP:0001254:Lethargy; HP:0003593:Infantile onset; HP:0001270:Motor delay; HP:0001290:Generalized hypotonia; HP:0001252:Hypotonia; HP:0000252:Microcephaly; HP:0001250:Seizure; HP:0001263:Global developmental delay; HP:0000007:Autosomal recessive inheritance	2-Methylbutyryl-CoA Dehydrogenase Deficiency; 2-methylbutyrylglycinuria; Isobutyryl-CoA dehydrogenase deficiency; 3-Hydroxy-3-Methylglutaryl-CoA Synthase 2 Deficiency; Apneic episodes in infancy; EHLERS-DANLOS SYNDROME, KYPHOSCOLIOTIC TYPE, 2; 2-methyl-3-hydroxybutyric aciduria; Kohlschutter Tonz syndrome; 3-Methylglutaconic Aciduria; Deficiency of butyryl-CoA dehydrogenase; Smith-Lemli-Opitz Syn…		ACADSB	0	0	0	0	0	0	0	0	0	0	0	0	0	0	0	0
43	ACHE	0	0	0	0	0	0	0	0	0	1	1	1	0		ACHE	acetylcholinesterase (Cartwright blood group)	GO:0032223 negative regulation of synaptic transmission, cholinergic;GO:0001507 acetylcholine catabolic process in synaptic cleft;GO:0006581 acetylcholine catabolic process	GO:0043083 synaptic cleft;GO:0031594 neuromuscular junction;GO:0005604 basement membrane	GO:0003990 acetylcholinesterase activity;GO:0004104 cholinesterase activity;GO:0042166 acetylcholine binding	Acetylcholinesterase hydrolyzes the neurotransmitter, acetylcholine at neuromuscular junctions and brain cholinergic synapses, and thus terminates signal transmission. It is also found on the red blood cell membranes, where it constitutes the Yt blood group antigen. Acetylcholinesterase exists in multiple molecular forms which possess similar catalytic properties, but differ in their oligomeric a…		(hsa00564)Glycerophospholipid metabolism; (hsa04725)Cholinergic synapse		Distribution: Detected in many; Specificity: Group enriched	chr7:100896994-100889994	FDA approved drug targets:Small molecule drugs; ENZYME proteins:Hydrolases; Enzymes; Blood group antigen proteins; Predicted intracellular proteins	Golgi apparatus (Approved); Additional: Vesicles	[GO:0003674] molecular_function; [GO:0005575] cellular_component; [GO:0005622] intracellular anatomical structure; [GO:0043226] organelle; [GO:0005634] nucleus; [GO:0005886] plasma membrane; [GO:0005576] extracellular region; [GO:0008150] biological_process; [GO:0048856] anatomical structure development; [GO:0009056] catabolic process; [GO:0006810] transport; [GO:0015031] protein transport; [GO:0…		Congenital Varicella Syndrome; Neoplasm of cauda equina; Ogilvie Syndrome; Other acute reactions to stress; Tired; Cholinergic crisis; Myasthenic crisis; Outbursts; Parasympathomimetic Disorders; Sundowning; Familial Olivopontocerebellar Atrophy; Neuromuscular Junction Diseases; WILSON-TURNER X-LINKED MENTAL RETARDATION SYNDROME; Weil Disease; BODY ACHE; Ischemic vascular dementia; Moderate demen…		ACHE	0	0	0	0	0	0	0	0	0	0	0	0	0	0	0	0
49	ACR	0	1	1	0	0	0	1	0	1	1	5	8	0		ACR	acrosin	GO:0002077 acrosome matrix dispersal;GO:0007341 penetration of zona pellucida;GO:0007340 acrosome reaction	GO:0043159 acrosomal matrix;GO:0005798 Golgi-associated vesicle;GO:0001669 acrosomal vesicle	GO:0004040 amidase activity;GO:0042806 fucose binding;GO:0005537 mannose binding	Acrosin is the major proteinase present in the acrosome of mature spermatozoa. It is a typical serine proteinase with trypsin-like specificity. It is stored in the acrosome in its precursor form, proacrosin. The active enzyme functions in the lysis of the zona pellucida, thus facilitating penetration of the sperm through the innermost glycoprotein layers of the ovum. The mRNA for proacrosin is sy…			Cytoplasmic expression in spermatozoa.; antibody: A subset of cells in seminiferus ducts displayed strong cytoplasmic staining. Moderate membranous positivity was observed in fallopian tube. Remaining normal tissues were generally negative.	Distribution: Detected in some; Specificity: Tissue enriched	chr22:50738204-50745339	Enzymes; ENZYME proteins:Hydrolases; Predicted secreted proteins; Peptidases:Serine-type peptidases		[GO:0008150] biological_process; [GO:0003674] molecular_function; [GO:0008233] peptidase activity; [GO:0005575] cellular_component; [GO:0005622] intracellular anatomical structure; [GO:0005737] cytoplasm; [GO:0031410] cytoplasmic vesicle; [GO:0043226] organelle; [GO:0005634] nucleus; [GO:0032991] protein-containing complex; [GO:0043167] ion binding; [GO:0003677] DNA binding; [GO:0005576] extracel…		Chronic ankle pain; Left lower quadrant pain; Mental status changes; Pain in wrist; Plexopathy; Suspected inflammatory arthritis; hip pain chronic; knee pain chronic; Heliotrope rash; Radiculopathy, Cervical; Right lower quadrant pain; Adnexal mass; Dactylitis; Foot osteomyelitis; Non-radiographic axial spondyloarthritis; BREAST PAIN FEMALE; Neuropsychiatric syndrome; Right upper quadrant pain; A…		ACR	0	0	0	0	0	0	0	0	0	0	0	0	0	0	0	0
50	ACO2	0	0	1	0	1	0	1	1	1	1	6	13	0		ACO2	aconitase 2	GO:0035900 response to isolation stress;GO:0006101 citrate metabolic process;GO:0006102 isocitrate metabolic process	GO:0005759 mitochondrial matrix;GO:0005739 mitochondrion;GO:0005829 cytosol	GO:0047780 citrate dehydratase activity;GO:0003994 aconitate hydratase activity;GO:0051538 3 iron, 4 sulfur cluster binding	The protein encoded by this gene belongs to the aconitase/IPM isomerase family. It is an enzyme that catalyzes the interconversion of citrate to isocitrate via cis-aconitate in the second step of the TCA cycle. This protein is encoded in the nucleus and functions in the mitochondrion. It was found to be one of the mitochondrial matrix proteins that are preferentially degraded by the serine protea…		(hsa01210)2-Oxocarboxylic acid metabolism; (hsa00020)Citrate cycle (TCA cycle); (hsa00630)Glyoxylate and dicarboxylate metabolism	antibody: Most normal tissues showed moderate to strong cytoplasmic positivity with a granular pattern. Hepatocytes in liver showed weak immunoreactivity.; Ubiquitous cytoplasmic expression in a granular pattern.	Distribution: Detected in all; Specificity: Tissue enhanced	chr22:41468756-41528979	Human disease related genes:Nervous system diseases:Eye disease; ENZYME proteins:Lyases; Disease related genes; Potential drug targets; Enzymes; Citric acid cycle related proteins; Predicted intracellular proteins	Mitochondria (Approved)	[GO:0003674] molecular_function; [GO:0008150] biological_process; [GO:0006091] generation of precursor metabolites and energy; [GO:0016829] lyase activity; [GO:0043167] ion binding; [GO:0005575] cellular_component; [GO:0005622] intracellular anatomical structure; [GO:0005737] cytoplasm; [GO:0043226] organelle; [GO:0005739] mitochondrion; [GO:0005829] cytosol; [GO:0044281] small molecule metabolic…	HP:0030528:Paracentral scotoma; HP:0000642:Red-green dyschromatopsia; HP:0007108:Demyelinating peripheral neuropathy; HP:0002305:Athetosis; HP:0000253:Progressive microcephaly; HP:0000556:Retinal dystrophy; HP:0000980:Pallor; HP:0007359:Focal-onset seizure; HP:0007663:Reduced visual acuity; HP:0011344:Severe global developmental delay; HP:0002120:Cerebral cortical atrophy; HP:0001284:Areflexia; H…	INFANTILE CEREBELLAR-RETINAL DEGENERATION; OPTIC ATROPHY 9; Scotoma, Paracentral; Fumarase deficiency; Appendicular hypotonia; Myoclonic spasms; OPTIC ATROPHY WITH OR WITHOUT DEAFNESS, OPHTHALMOPLEGIA, MYOPATHY, ATAXIA, AND NEUROPATHY; Color Blindness, Red-Green; Arachnoid Cysts; Depletion of mitochondrial DNA; Athetosis; Optic Neuropathy; Progressive microcephaly; Ataxia, Truncal; Peripheral dem…	DOID:0050883 infantile cerebellar-retinal degeneration;DOID:0111442 optic atrophy 9	ACO2	0	0	0	0	0	0	0	0	0	0	0	0	0	0	0	0
56	ACRV1	0	1	1	0	0	0	1	1	1	1	6	11	0		ACRV1	acrosomal vesicle protein 1	GO:0007275 multicellular organism development;GO:0048856 anatomical structure development;GO:0032502 developmental process	GO:0001669 acrosomal vesicle;GO:0030141 secretory granule;GO:0099503 secretory vesicle	GO:0005515 protein binding;GO:0005488 binding;GO:0003674 molecular_function	This gene encodes a testis-specific, differentiation antigen, acrosomal vesicle protein 1, that arises within the acrosomal vesicle during spermatogenesis, and is associated with the acrosomal membranes and matrix of mature sperm. The acrosomal vesicle protein 1 may be involved in sperm-zona binding or penetration. Alternatively spliced transcript variants have been described. [provided by RefSeq…	testis		Selective expression in acrosomes in testis.; antibody: A subset of cells in seminiferus ducts of testis displayed strong cytoplasmic positivity. Remaining normal cells along with stroma were negative.	Distribution: Detected in some; Specificity: Tissue enriched	chr11:125680847-125671522	Predicted secreted proteins		[GO:0005575] cellular_component; [GO:0005622] intracellular anatomical structure; [GO:0005737] cytoplasm; [GO:0031410] cytoplasmic vesicle; [GO:0043226] organelle; [GO:0003674] molecular_function; [GO:0008150] biological_process; [GO:0048856] anatomical structure development		Severe Acute Respiratory Syndrome		ACRV1	0	0	0	0	0	0	0	0	0	0	1	0	0	0	0	0
87	ACTN1	1	1	1	0	1	1	1	1	1	1	9	36	0		ACTN1	actinin alpha 1	GO:0051639 actin filament network formation;GO:0030220 platelet formation;GO:0036344 platelet morphogenesis	GO:0005916 fascia adherens;GO:0031143 pseudopodium;GO:0014704 intercalated disc	GO:0005519 cytoskeletal regulatory protein binding;GO:0017166 vinculin binding;GO:0099186 structural constituent of postsynapse	Alpha actinins belong to the spectrin gene superfamily which represents a diverse group of cytoskeletal proteins, including the alpha and beta spectrins and dystrophins. Alpha actinin is an actin-binding protein with multiple roles in different cell types. In nonmuscle cells, the cytoskeletal isoform is found along microfilament bundles and adherens-type junctions, where it is involved in binding…		(hsa04520)Adherens junction; (hsa05146)Amoebiasis; (hsa04670)Leukocyte transendothelial migration	High cytoplasmic and membranous expression in glandular epithelia and neuronal cells.	Distribution: Detected in all; Specificity: Tissue enhanced	chr14:68979302-68874123	Human disease related genes:Cardiovascular diseases:Hematologic diseases; FDA approved drug targets:Biotech drugs; Predicted intracellular proteins; Disease related genes	Actin filaments;Focal adhesion sites;Plasma membrane (Approved)	[GO:0003674] molecular_function; [GO:0043167] ion binding; [GO:0005575] cellular_component; [GO:0005622] intracellular anatomical structure; [GO:0005737] cytoplasm; [GO:0005886] plasma membrane; [GO:0008092] cytoskeletal protein binding; [GO:0043226] organelle; [GO:0005856] cytoskeleton; [GO:0008150] biological_process; [GO:0009058] biosynthetic process; [GO:0034641] cellular nitrogen compound me…	HP:0032438:Platelet anisocytosis; HP:0011877:Increased mean platelet volume; HP:0000421:Epistaxis; HP:0001873:Thrombocytopenia; HP:0000006:Autosomal dominant inheritance	BLEEDING DISORDER, PLATELET-TYPE, 15; Platelet anisocytosis; Autosomal dominant macrothrombocytopenia; Increased mean platelet volume; Macrocytosis; Anisocyte Measurement; Anisocytosis; Macrothrombocytopenia; Myopathies, Nemaline; Pneumonia, Ventilator-Associated; Platelet Component Distribution Width Measurement; Carcinoma, Endometrioid; Platelet mean volume determination (procedure); Basal-Like…	DOID:0111053 platelet-type bleeding disorder 15	ACTN1	0	0	0	1	0	0	0	1	0	1	0	0	0	0	0	0
89	ACTN3	1	1	1	0	1	0	0	0	1	1	6	14	0		ACTN3	actinin alpha 3	GO:0031446 regulation of fast-twitch skeletal muscle fiber contraction;GO:0031448 positive regulation of fast-twitch skeletal muscle fiber contraction;GO:1900159 positive regulation of bone mineralization involved in bone maturation	GO:0031143 pseudopodium;GO:0030864 cortical actin cytoskeleton;GO:0005903 brush border	GO:0008307 structural constituent of muscle;GO:0044325 transmembrane transporter binding;GO:0005178 integrin binding	This gene encodes a member of the alpha-actin binding protein gene family. The encoded protein is primarily expressed in skeletal muscle and functions as a structural component of sarcomeric Z line. This protein is involved in crosslinking actin containing thin filaments. An allelic polymorphism in this gene results in both coding and non-coding variants; the reference genome represents the codin…	muscle	(hsa05412)Arrhythmogenic right ventricular cardiomyopathy	Estimation of protein expression could not be performed. View primary data.; antibody: Strong cytoplasmic and membranous staining was observed mainly in glandular epithelia and neuronal cells. Other normal tissues generally displayed moderate positivity, in squamous epithelia only in basal cell layers. Endothelial cells showed distinct immunoreactivity.	Distribution: Detected in some; Specificity: Tissue enriched	chr11:66546395-66563334	Predicted intracellular proteins	Actin filaments (Uncertain)	[GO:0003674] molecular_function; [GO:0043167] ion binding; [GO:0005575] cellular_component; [GO:0008092] cytoskeletal protein binding; [GO:0005886] plasma membrane; [GO:0008150] biological_process; [GO:0008219] cell death; [GO:0005622] intracellular anatomical structure; [GO:0005737] cytoplasm; [GO:0005829] cytosol; [GO:0043226] organelle; [GO:0005576] extracellular region; [GO:0005615] extracell…		SPRINTING PERFORMANCE; ACTN3 DEFICIENCY; Malocclusion, Angle class II; Glycogen Storage Disease Type V; Fatigability; CRANIOMETAPHYSEAL DYSPLASIA, AUTOSOMAL DOMINANT; Coronary Microvascular Disease; Idiopathic scoliosis; Generalized glycogen storage disease of infants; Sore to touch; CAMPOMELIC DYSPLASIA; Sickle Cell Trait; Muscular stiffness; Idiopathic Inflammatory Myopathies; Malocclusion; Mus…		ACTN3	0	0	0	0	0	0	0	0	0	0	0	0	0	0	0	0
91	ACVR1B	0	1	0	1	0	1	1	0	1	1	6	11	0		ACVR1B	activin A receptor type 1B	GO:1901165 positive regulation of trophoblast cell migration;GO:0032927 positive regulation of activin receptor signaling pathway;GO:0038092 nodal signaling pathway	GO:0048179 activin receptor complex;GO:1902554 serine/threonine protein kinase complex;GO:1902911 protein kinase complex	GO:0016361 activin receptor activity, type I;GO:0034711 inhibin binding;GO:0017002 activin-activated receptor activity	This gene encodes an activin A type IB receptor. Activins are dimeric growth and differentiation factors which belong to the transforming growth factor-beta (TGF-beta) superfamily of structurally related signaling proteins. Activins signal through a heteromeric complex of receptor serine kinases which include at least two type I and two type II receptors. This protein is a type I receptor which i…		(hsa04350)TGF-beta signaling pathway; (hsa04550)Signaling pathways regulating pluripotency of stem cells; (hsa04060)Cytokine-cytokine receptor interaction	Cytoplasmic expression in several tissues, including gastrointestinal.	Distribution: Detected in all; Specificity: Low tissue specificity	chr12:51951696-51997078	Cancer-related genes:Mutated cancer genes; Kinases:TKL Ser/Thr protein kinases; Cancer-related genes:Candidate cancer biomarkers; Cancer-related genes:Mutational cancer driver genes; Disease related genes; Potential drug targets; Enzymes; Predicted intracellular proteins; ENZYME proteins:Transferases	Cytosol (Approved)	[GO:0003674] molecular_function; [GO:0043167] ion binding; [GO:0005575] cellular_component; [GO:0008150] biological_process; [GO:0006464] cellular protein modification process; [GO:0016301] kinase activity; [GO:0007165] signal transduction; [GO:0005622] intracellular anatomical structure; [GO:0005737] cytoplasm; [GO:0005829] cytosol; [GO:0005886] plasma membrane; [GO:0048856] anatomical structure…		ATRIAL ENLARGEMENT; Adenocarcinoma of small intestine; Pancreatic Intraductal Papillary Mucinous Neoplasm; Granulocyte count; response to bronchodilator; Goiter; Neutrophil count (procedure); Blood basophil count (lab test); Cardiac fibrosis; Seminoma; Pheochromocytoma; Pulmonary Emphysema; Adrenal Gland Pheochromocytoma; Malignant mesothelioma; Eosinophil count procedure; Myocardial Ischemia; Pa…		ACVR1B	0	0	0	0	0	0	0	0	0	0	0	0	0	0	1	0
92	ACVR2A	0	1	0	0	0	0	0	0	1	0	2	2	0		ACVR2A	activin A receptor type 2A	GO:0043084 penile erection;GO:0060011 Sertoli cell proliferation;GO:0042713 sperm ejaculation	GO:0034673 inhibin-betaglycan-ActRII complex;GO:0048179 activin receptor complex;GO:1902554 serine/threonine protein kinase complex	GO:0034711 inhibin binding;GO:0098821 BMP receptor activity;GO:0017002 activin-activated receptor activity	This gene encodes a receptor that mediates the functions of activins, which are members of the transforming growth factor-beta (TGF-beta) superfamily involved in diverse biological processes. The encoded protein is a transmembrane serine-threonine kinase receptor which mediates signaling by forming heterodimeric complexes with various combinations of type I and type II receptors and ligands in a …	mammary_gland	(hsa04350)TGF-beta signaling pathway; (hsa05418)Fluid shear stress and atherosclerosis; (hsa04550)Signaling pathways regulating pluripotency of stem cells	Ubiquitous cytoplasmic and membranous expression.; antibody: Normal tissues displayed moderate to strong cytoplasmic and membranous positivity.	Distribution: Detected in all; Specificity: Low tissue specificity	chr2:147844517-147930822	Enzymes; Kinases:TKL Ser/Thr protein kinases; ENZYME proteins:Transferases; Cancer-related genes:Candidate cancer biomarkers	Cytosol (Approved)	[GO:0003674] molecular_function; [GO:0043167] ion binding; [GO:0005575] cellular_component; [GO:0008150] biological_process; [GO:0006464] cellular protein modification process; [GO:0016301] kinase activity; [GO:0007165] signal transduction; [GO:0005886] plasma membrane; [GO:0009058] biosynthetic process; [GO:0034641] cellular nitrogen compound metabolic process; [GO:0048856] anatomical structure …		Benign chondrogenic neoplasm; Osteopenia due to disuse; Osteodystrophy; Osteochondromatosis; Chondroma; Microsatellite Instability; Replication Error Phenotype; Chondromatosis, Synovial; Synovial osteochondromatosis; Enchondromatosis; Microsatellite instability-high colorectal cancer; Hereditary Multiple Exostoses; Stage 0 Breast Carcinoma; Adenocarcinoma of small intestine; Pierre Robin Syndrome…		ACVR2A	0	0	0	0	0	0	0	0	0	0	0	0	0	0	0	0
93	ACVR2B	0	1	0	0	0	0	0	0	0	0	1	1	0		ACVR2B	activin A receptor type 2B	GO:0032927 positive regulation of activin receptor signaling pathway;GO:0060836 lymphatic endothelial cell differentiation;GO:0048617 embryonic foregut morphogenesis	GO:0048179 activin receptor complex;GO:1902554 serine/threonine protein kinase complex;GO:1902911 protein kinase complex	GO:0016362 activin receptor activity, type II;GO:0017002 activin-activated receptor activity;GO:0048185 activin binding	Activins are dimeric growth and differentiation factors which belong to the transforming growth factor-beta (TGF-beta) superfamily of structurally related signaling proteins. Activins signal through a heteromeric complex of receptor serine kinases which include at least two type I (I and IB) and two type II (II and IIB) receptors. These receptors are all transmembrane proteins, composed of a liga…	placenta	(hsa04350)TGF-beta signaling pathway; (hsa05418)Fluid shear stress and atherosclerosis; (hsa04550)Signaling pathways regulating pluripotency of stem cells	antibody: Most normal tissues showed weak to moderate cytoplasmic positivity. Strong staining was observed in spermatogonia in testis and placental trophoblasts. Bile ducts, the prostate, cells in the CNS and lymphoid tissues were negative.; Cytoplasmic expression in most tissues, including testis.	Distribution: Detected in many; Specificity: Low tissue specificity	chr3:38453890-38493142	Cancer-related genes:Mutated cancer genes; Kinases:TKL Ser/Thr protein kinases; Cancer-related genes:Candidate cancer biomarkers; Human disease related genes:Congenital malformations:Other congenital malformations; Disease related genes; Potential drug targets; Enzymes; ENZYME proteins:Transferases		[GO:0003674] molecular_function; [GO:0043167] ion binding; [GO:0005575] cellular_component; [GO:0008150] biological_process; [GO:0006464] cellular protein modification process; [GO:0016301] kinase activity; [GO:0007165] signal transduction; [GO:0005886] plasma membrane; [GO:0032991] protein-containing complex; [GO:0042592] homeostatic process; [GO:0048856] anatomical structure development; [GO:00…	HP:0010452:Ectopia of the spleen; HP:0012020:Right aortic arch; HP:0001651:Dextrocardia; HP:0006695:Atrioventricular canal defect; HP:0001629:Ventricular septal defect; HP:0000006:Autosomal dominant inheritance	Ectopic spleen; Left-Right Axis Malformations; Heterotaxy, Visceroatrial, Autosomal Recessive; Isomerism of atrial appendages; Isomerism of atrial appendages with asplenia or polysplenia; Polyasplenia; VAH, AUTOSOMAL RECESSIVE; Right aortic arch (disorder); Left Atrial Isomerism; Polysplenia Syndrome; Situs ambiguous; Asplenia Syndrome; Right Atrial Isomerism; Nephrogenic rest; Neonatal Hypoxic I…	DOID:0050545 visceral heterotaxy	ACVR2B	0	0	0	0	0	0	0	0	0	0	0	0	0	0	0	0
94	ACVRL1	0	0	1	0	0	0	0	0	1	1	3	3	0		ACVRL1	activin A receptor like type 1	GO:0002043 blood vessel endothelial cell proliferation involved in sprouting angiogenesis;GO:0060836 lymphatic endothelial cell differentiation;GO:0001955 blood vessel maturation	GO:0070724 BMP receptor complex;GO:0098802 plasma membrane signaling receptor complex;GO:0043025 neuronal cell body	GO:0005025 transforming growth factor beta receptor activity, type I;GO:0016361 activin receptor activity, type I;GO:0098821 BMP receptor activity	This gene encodes a type I cell-surface receptor for the TGF-beta superfamily of ligands. It shares with other type I receptors a high degree of similarity in serine-threonine kinase subdomains, a glycine- and serine-rich region (called the GS domain) preceding the kinase domain, and a short C-terminal tail. The encoded protein, sometimes termed ALK1, shares similar domain structures with other c…		(hsa04060)Cytokine-cytokine receptor interaction	Cytoplasmic expression in several tissue types.; antibody: Strong cytoplasmic and nuclear positivity was observed in cells in seminiferus ducts. Gall bladder, renal tubules, intestinal tract and neuronal cells in CNS showed strong cytoplasmic immunoreactivity. Other normal tissues were in general weakly stained or negative.	Distribution: Detected in many; Specificity: Tissue enhanced	chr12:51906913-51923361	Kinases:TKL Ser/Thr protein kinases; Human disease related genes:Congenital malformations:Congenital malformations of the circulatory system; Predicted intracellular proteins; Disease related genes; Potential drug targets; Enzymes; Human disease related genes:Cardiovascular diseases:Hypertensive diseases; ENZYME proteins:Transferases		[GO:0003674] molecular_function; [GO:0043167] ion binding; [GO:0005575] cellular_component; [GO:0016301] kinase activity; [GO:0008150] biological_process; [GO:0007165] signal transduction; [GO:0006464] cellular protein modification process; [GO:0005886] plasma membrane; [GO:0048856] anatomical structure development; [GO:0048646] anatomical structure formation involved in morphogenesis; [GO:000695…	HP:0000227:Tongue telangiectasia; HP:0002707:Palate telangiectasia; HP:0006107:Fingerpad telangiectases; HP:0000434:Nasal mucosa telangiectasia; HP:0001232:Nail bed telangiectasia; HP:0002604:Gastrointestinal telangiectasia; HP:0030049:Brain abscess; HP:0002390:Spinal arteriovenous malformation; HP:0002629:Gastrointestinal arteriovenous malformation; HP:0006574:Hepatic arteriovenous malformation;…	Arteriovenous malformation of liver; Fingerpad telangiectases; Gastrointestinal telangiectasia; HEREDITARY HEMORRHAGIC TELANGIECTASIA-RELATED PULMONARY ARTERIAL HYPERTENSION; Nail bed telangiectasia; Nasal mucosa telangiectasia; Palate telangiectasia; Spinal arteriovenous malformation; Thromboxane synthetase deficiency; Tongue telangiectasia; Gastrointestinal arteriovenous malformation; Pulmonary…	DOID:1270 hereditary hemorrhagic telangiectasia	ACVRL1	0	0	0	0	0	0	0	0	0	0	0	0	0	0	0	0
95	ACY1	0	0	0	0	0	1	0	0	1	1	3	4	0		ACY1	aminoacylase 1	GO:0006520 cellular amino acid metabolic process;GO:0019752 carboxylic acid metabolic process;GO:0043436 oxoacid metabolic process	GO:0070062 extracellular exosome;GO:1903561 extracellular vesicle;GO:0043230 extracellular organelle	GO:0004046 aminoacylase activity;GO:0016811 hydrolase activity, acting on carbon-nitrogen (but not peptide) bonds, in linear amides;GO:0016810 hydrolase activity, acting on carbon-nitrogen (but not peptide) bonds	This gene encodes a cytosolic, homodimeric, zinc-binding enzyme that catalyzes the hydrolysis of acylated L-amino acids to L-amino acids and an acyl group, and has been postulated to function in the catabolism and salvage of acylated amino acids. This gene is located on chromosome 3p21.1, a region reduced to homozygosity in small-cell lung cancer (SCLC), and its expression has been reported to be…		(hsa01210)2-Oxocarboxylic acid metabolism; (hsa00220)Arginine biosynthesis; (hsa01230)Biosynthesis of amino acids	antibody: Specific and intense staining of proximal renal tubules was observed. Hepatocytes showed distinct nuclear positivity. ; Mainly cytoplasmic expression in hepatocytes and renal tubules.	Distribution: Detected in all; Specificity: Group enriched	chr3:51983535-51989197	ENZYME proteins:Hydrolases; Peptidases:Metallopeptidases; Human disease related genes:Congenital disorders of metabolism:Congenital disorders of amino acid metabolism; Disease related genes; Potential drug targets; Enzymes; Predicted intracellular proteins		[GO:0005575] cellular_component; [GO:0005622] intracellular anatomical structure; [GO:0005737] cytoplasm; [GO:0003674] molecular_function; [GO:0008150] biological_process; [GO:0044281] small molecule metabolic process; [GO:0006520] cellular amino acid metabolic process; [GO:0016810] hydrolase activity, acting on carbon-nitrogen (but not peptide) bonds; [GO:0043167] ion binding; [GO:0005829] cytos…	HP:0006846:Acute encephalopathy; HP:0006817:Aplasia/Hypoplasia of the cerebellar vermis; HP:0003396:Syringomyelia; HP:0002188:Delayed CNS myelination; HP:0025356:Psychomotor retardation; HP:0000445:Wide nose; HP:0007370:Aplasia/Hypoplasia of the corpus callosum; HP:0003324:Generalized muscle weakness; HP:0002104:Apnea; HP:0001298:Encephalopathy; HP:0000752:Hyperactivity; HP:0002013:Vomiting; HP:0…	Aminoacylase 1 deficiency; Biotinidase Deficiency; Leukoencephalitis, Acute Hemorrhagic; Delayed CNS myelination; Aplasia/Hypoplasia of the cerebellar vermis; Acute encephalopathy; Syringomyelia; Wide nose; Motor retardation; Aplasia/Hypoplasia of the corpus callosum; Generalized Muscle Weakness, CTCAE; Inborn Errors of Metabolism; Condition, Preneoplastic; Generalized muscle weakness; Sarcomatoi…		ACY1	0	0	0	0	0	0	0	0	0	0	0	0	0	0	0	0
97	ACYP1	0	0	0	1	1	0	0	1	1	1	5	5	0		ACYP1	acylphosphatase 1	GO:0006796 phosphate-containing compound metabolic process;GO:0006793 phosphorus metabolic process;GO:0044237 cellular metabolic process		GO:0003998 acylphosphatase activity;GO:0016817 hydrolase activity, acting on acid anhydrides;GO:0016818 hydrolase activity, acting on acid anhydrides, in phosphorus-containing anhydrides	This gene is a member of the acylphosphatase family. The encoded protein is a small cytosolic enzyme that catalyzes the hydrolysis of the carboxyl-phosphate bond of acylphosphates. Two isoenzymes have been isolated and described based on their tissue localization: erythrocyte (common) type acylphosphatase encoded by this gene, and muscle type acylphosphatase. Alternative splicing results in multi…		(hsa00620)Pyruvate metabolism; (hsa01100)Metabolic pathways	antibody: Most of the normal tissues displayed moderate cytoplasmic positivity with additional nuclear staining in many cases. Strong nuclear staining was observed in fallopian tubes and seminiferous ducts while megakaryocytes showed strong cytoplasmic immunoreactivity.; Cytoplasmic expression in a vast majority of tissues.	Distribution: Detected in all; Specificity: Low tissue specificity	chr14:75069490-75053243	Enzymes; ENZYME proteins:Hydrolases; Predicted intracellular proteins	Cytosol (Approved); Additional: Nucleoplasm	[GO:0003674] molecular_function; [GO:0008150] biological_process				ACYP1	0	0	0	0	0	0	0	0	1	0	0	0	0	0	0	0
101	ADAM8	0	1	1	0	1	0	1	1	0	0	5	6	0		ADAM8	ADAM metallopeptidase domain 8	GO:2000413 regulation of fibronectin-dependent thymocyte migration;GO:2000415 positive regulation of fibronectin-dependent thymocyte migration;GO:2000309 positive regulation of tumor necrosis factor (ligand) superfamily member 11 production	GO:0071133 alpha9-beta1 integrin-ADAM8 complex;GO:0032010 phagolysosome;GO:0032127 dense core granule membrane	GO:0043621 protein self-association;GO:0004222 metalloendopeptidase activity;GO:0004252 serine-type endopeptidase activity	This gene encodes a member of the ADAM (a disintegrin and metalloprotease domain) family. Members of this family are membrane-anchored proteins structurally related to snake venom disintegrins, and have been implicated in a variety of biological processes involving cell-cell and cell-matrix interactions, including fertilization, muscle development, and neurogenesis. The protein encoded by this ge…	bone_marrow		Cytoplasmic expression in several tissues with additional expression in immune cells.; antibody: Most normal tissues displayed weak to moderate cytoplasmic positivity. A subset of non-germinal center cells and hematopoietic cells showed strong staining. Liver, islets of Langerhans and squamous epithelia were negative.	Distribution: Detected in many; Specificity: Tissue enhanced	chr10:133276891-133262422	Predicted intracellular proteins; CD markers		[GO:0008150] biological_process; [GO:0003674] molecular_function; [GO:0008233] peptidase activity; [GO:0006950] response to stress; [GO:0005575] cellular_component; [GO:0005622] intracellular anatomical structure; [GO:0005737] cytoplasm; [GO:0043167] ion binding; [GO:0005886] plasma membrane; [GO:0031410] cytoplasmic vesicle; [GO:0043226] organelle; [GO:0007165] signal transduction; [GO:0006464] …		Ascending aortic dissection; Periodontal Pocket; Chediak-Higashi Syndrome; Corneal pannus; Brain Tumor, Primary; Carotid Stenosis; Gingivitis; Synovitis; bone destruction; Superficial ulcer; Atherosclerotic lesion; Chronic Periodontitis; Malignant neoplasm of brain; CNS disorder; Chondrosarcoma; Metastatic malignant neoplasm to brain; Chemically-Induced Liver Toxicity; Hepatitis, Toxic; Drug-Indu…		ADAM8	0	0	0	0	0	0	0	0	0	0	0	0	0	0	0	0
103	ADAR	0	0	0	0	0	0	0	0	0	1	1	1	1	hsa05171	ADAR	adenosine deaminase RNA specific	GO:1900369 negative regulation of RNA interference;GO:1900368 regulation of RNA interference;GO:0044387 negative regulation of protein kinase activity by regulation of protein phosphorylation	GO:0044530 supraspliceosomal complex;GO:0005681 spliceosomal complex;GO:1990904 ribonucleoprotein complex	GO:0003726 double-stranded RNA adenosine deaminase activity;GO:0008251 tRNA-specific adenosine deaminase activity;GO:0004000 adenosine deaminase activity	This gene encodes the enzyme responsible for RNA editing by site-specific deamination of adenosines. This enzyme destabilizes double-stranded RNA through conversion of adenosine to inosine. Mutations in this gene have been associated with dyschromatosis symmetrica hereditaria. Alternative splicing results in multiple transcript variants. [provided by RefSeq, Jul 2010]		(hsa04623)Cytosolic DNA-sensing pathway; (hsa05162)Measles; (hsa05164)Influenza A	antibody: Most normal tissues showed moderate nuclear staining. Neuronal cells, testis and nasopharynx showed strong nuclear positivity.; Ubiquitous nuclear expression.	Distribution: Detected in all; Specificity: Low tissue specificity	chr1:154627997-154582057	Human disease related genes:Immune system diseases:Other immune system diseases; ENZYME proteins:Hydrolases; Human disease related genes:Skin diseases:Skin and soft tissue diseases; Disease related genes; Potential drug targets; Enzymes; Predicted intracellular proteins	Nucleoli (Enhanced); Additional: Nucleoplasm	[GO:0003674] molecular_function; [GO:0003723] RNA binding; [GO:0008150] biological_process; [GO:0006950] response to stress; [GO:0002376] immune system process; [GO:0016810] hydrolase activity, acting on carbon-nitrogen (but not peptide) bonds; [GO:0034641] cellular nitrogen compound metabolic process; [GO:0005575] cellular_component; [GO:0005622] intracellular anatomical structure; [GO:0043226] …	HP:0007441:Hyperpigmented/hypopigmented macules; HP:0007374:Atrophy/Degeneration involving the caudate nucleus; HP:0007988:Macular hypopigmentation; HP:0007811:Horizontal pendular nystagmus; HP:0011509:Macular hyperpigmentation; HP:0006799:Basal ganglia cysts; HP:0030038:Enchondroma; HP:0009704:Chronic CSF lymphocytosis; HP:0009709:Increased CSF interferon alpha; HP:0007052:Multifocal cerebral wh…	AICARDI-GOUTIERES SYNDROME 6; Macular hyperpigmentation; Macular hypopigmentation; Atrophy/Degeneration involving the caudate nucleus; Congenital encephalopathy; Dyschromatosis; Adnexal mass; Hyperpigmented/hypopigmented macules; Reticulate acropigmentation of Kitamura; Aicardi-Goutieres Syndrome 2; Basal ganglia cysts; AICARDI-GOUTIERES SYNDROME 1; Chronic CSF lymphocytosis; Horizontal pendular …	DOID:0050629 Aicardi-Goutieres syndrome;DOID:0060257 dyschromatosis symmetrica hereditaria	ADAR	0	0	0	0	0	0	0	0	0	0	0	0	0	1	0	0
105	ADARB2	0	0	0	0	0	1	0	0	0	0	1	1	0		ADARB2	adenosine deaminase RNA specific B2 (inactive)	GO:0006382 adenosine to inosine editing;GO:0016553 base conversion or substitution editing;GO:0009451 RNA modification	GO:0005730 nucleolus;GO:0031981 nuclear lumen;GO:0043228 non-membrane-bounded organelle	GO:0003726 double-stranded RNA adenosine deaminase activity;GO:0008251 tRNA-specific adenosine deaminase activity;GO:0004000 adenosine deaminase activity	This gene encodes a member of the double-stranded RNA adenosine deaminase family of RNA-editing enzymes and may play a regulatory role in RNA editing. [provided by RefSeq, Jul 2008]				Distribution: Detected in some; Specificity: Tissue enriched	chr10:1737525-1177313	Predicted intracellular proteins		[GO:0003674] molecular_function; [GO:0003723] RNA binding; [GO:0008150] biological_process; [GO:0034641] cellular nitrogen compound metabolic process; [GO:0016810] hydrolase activity, acting on carbon-nitrogen (but not peptide) bonds; [GO:0005575] cellular_component; [GO:0005622] intracellular anatomical structure; [GO:0043226] organelle; [GO:0005634] nucleus; [GO:0006397] mRNA processing; [GO:00…		Adverse effects, not elsewhere classified; Migraine with Aura; Organic Mental Disorders, Substance-Induced; Prescription Drug Abuse; Drug Use Disorders; Substance-Related Disorders; Substance Dependence; Substance abuse problem; Drug habituation; Substance Use Disorders; Drug Dependence; Age at menarche; Drug abuse; Migraine Disorders; Childhood Astrocytoma; Systolic Pressure; Astrocytoma; Brain …		ADARB2	0	0	0	0	0	0	0	0	0	0	0	0	0	0	0	0
107	ADCY1	0	1	0	0	0	1	0	1	1	1	5	6	0		ADCY1	adenylate cyclase 1	GO:0150076 neuroinflammatory response;GO:0006171 cAMP biosynthetic process;GO:1904321 response to forskolin	GO:0098686 hippocampal mossy fiber to CA3 synapse;GO:0099061 integral component of postsynaptic density membrane;GO:0099146 intrinsic component of postsynaptic density membrane	GO:0008294 calcium- and calmodulin-responsive adenylate cyclase activity;GO:0004016 adenylate cyclase activity;GO:0009975 cyclase activity	This gene encodes a member of the of adenylate cyclase gene family that is primarily expressed in the brain. This protein is regulated by calcium/calmodulin concentration and may be involved in brain development. Alternate splicing results in multiple transcript variants. [provided by RefSeq, Aug 2013]		(hsa04913)Ovarian steroidogenesis; (hsa04923)Regulation of lipolysis in adipocytes; (hsa04213)Longevity regulating pathway - multiple species	Estimation of protein expression could not be performed. View primary data.; antibody: Most normal tissues showed moderate nuclear positivity occasionally combined with cytoplasmic staining. Ciliated cells e.g. in epididymis and fallopian tube, showed additional membranous staining. Respiratory epithelium, gall bladder, urothelium, trophoblastic cells and prostate glands expressed strong positivi…	Distribution: Detected in many; Specificity: Group enriched	chr7:45574140-45723116	Human disease related genes:Nervous system diseases:Ear disease; Cancer-related genes:Mutational cancer driver genes; ENZYME proteins:Lyases; Disease related genes; Potential drug targets; Enzymes; Predicted intracellular proteins	Mitochondria (Approved)	[GO:0008150] biological_process; [GO:0007165] signal transduction; [GO:0009058] biosynthetic process; [GO:0044281] small molecule metabolic process; [GO:0034641] cellular nitrogen compound metabolic process; [GO:0003674] molecular_function; [GO:0016829] lyase activity; [GO:0005575] cellular_component; [GO:0043167] ion binding; [GO:0002376] immune system process; [GO:0005886] plasma membrane; [GO:…	HP:0000399:Prelingual sensorineural hearing impairment; HP:0000007:Autosomal recessive inheritance	DEAFNESS, AUTOSOMAL RECESSIVE 44; Chronic visceral pain; Prelingual sensorineural hearing impairment; mucosal melanoma; Reflex Epilepsy, Audiogenic; Hyperkinesia, Generalized; DEAFNESS, AUTOSOMAL RECESSIVE (disorder); McCune-Albright Syndrome; Drug Withdrawal Symptoms; Visceral Pain; Hyperkinesia; Substance Withdrawal Syndrome; Opiate Addiction; Adenocarcinoma of rectum; Withdrawal Symptoms; Frag…	DOID:0110501 autosomal recessive nonsyndromic deafness 44	ADCY1	0	0	0	0	0	0	0	0	1	0	0	0	0	0	0	0
108	ADCY2	0	1	0	0	0	0	0	0	0	1	2	2	0		ADCY2	adenylate cyclase 2	GO:0006171 cAMP biosynthetic process;GO:1904321 response to forskolin;GO:1904322 cellular response to forskolin	GO:0045121 membrane raft;GO:0098857 membrane microdomain;GO:0030425 dendrite	GO:0004016 adenylate cyclase activity;GO:0008179 adenylate cyclase binding;GO:0009975 cyclase activity	This gene encodes a member of the family of adenylate cyclases, which are membrane-associated enzymes that catalyze the formation of the secondary messenger cyclic adenosine monophosphate (cAMP). This enzyme is insensitive to Ca(2+)/calmodulin, and is stimulated by the G protein beta and gamma subunit complex. [provided by RefSeq, Jul 2008]	peripheral_nervous_system	(hsa04913)Ovarian steroidogenesis; (hsa04923)Regulation of lipolysis in adipocytes; (hsa04213)Longevity regulating pathway - multiple species	antibody: Most normal tissues showed weak to moderate cytoplasmic positivity. Strong immunoreactivity was observed in Leydig cells in testis and adrenal gland. ; Cytoplasmic expression in several different tissues, most abundant in CNS and adrenal gland.	Distribution: Detected in many; Specificity: Group enriched	chr5:7396138-7830081	Enzymes; ENZYME proteins:Lyases; Predicted intracellular proteins		[GO:0005575] cellular_component; [GO:0005886] plasma membrane; [GO:0008150] biological_process; [GO:0007165] signal transduction; [GO:0009058] biosynthetic process; [GO:0044281] small molecule metabolic process; [GO:0034641] cellular nitrogen compound metabolic process; [GO:0003674] molecular_function; [GO:0016829] lyase activity; [GO:0005622] intracellular anatomical structure; [GO:0005737] cyto…		Severe chronic obstructive pulmonary disease; Manic Disorder; Fasting blood glucose measurement; Coronary Stenosis; Depression, Bipolar; Manic; trachomatis; Borderline Personality Disorder; Serum LDL cholesterol measurement; Childhood asthma; Bronchopulmonary Dysplasia; Low density lipoprotein cholesterol measurement; Neuroendocrine Tumors; SCOLIOSIS, ISOLATED, SUSCEPTIBILITY TO, 3; Intelligence;…		ADCY2	0	0	0	0	0	0	0	1	0	0	0	0	0	0	0	0
111	ADCY5	0	1	0	0	0	0	0	1	0	1	3	7	0		ADCY5	adenylate cyclase 5	GO:0007195 adenylate cyclase-inhibiting dopamine receptor signaling pathway;GO:0001973 G protein-coupled adenosine receptor signaling pathway;GO:0035588 G protein-coupled purinergic receptor signaling pathway	GO:0045111 intermediate filament cytoskeleton;GO:0005929 cilium;GO:0005887 integral component of plasma membrane	GO:0004016 adenylate cyclase activity;GO:0008179 adenylate cyclase binding;GO:0009975 cyclase activity	This gene encodes a member of the membrane-bound adenylyl cyclase enzymes. Adenylyl cyclases mediate G protein-coupled receptor signaling through the synthesis of the second messenger cAMP. Activity of the encoded protein is stimulated by the Gs alpha subunit of G protein-coupled receptors and is inhibited by protein kinase A, calcium and Gi alpha subunits. Single nucleotide polymorphisms in this…		(hsa05030)Cocaine addiction; (hsa04913)Ovarian steroidogenesis; (hsa04923)Regulation of lipolysis in adipocytes	Estimation of protein expression could not be performed. View primary data.; antibody: Most normal cells displayed weak cytoplasmic staining or were negative. The urinary bladder showed strong membranous staining while cilia were strongly stained in fallopian tube and airway epithelia. Seminal vesicle and placenta displayed moderate cytoplasmic staining.	Distribution: Detected in many; Specificity: Tissue enhanced	chr3:123449090-123282296	Human disease related genes:Nervous system diseases:Other nervous and sensory system diseases; ENZYME proteins:Lyases; Disease related genes; Potential drug targets; Enzymes; Predicted intracellular proteins	Intermediate filaments (Enhanced)	[GO:0005575] cellular_component; [GO:0005886] plasma membrane; [GO:0008150] biological_process; [GO:0007165] signal transduction; [GO:0009058] biosynthetic process; [GO:0044281] small molecule metabolic process; [GO:0034641] cellular nitrogen compound metabolic process; [GO:0003674] molecular_function; [GO:0016829] lyase activity; [GO:0043167] ion binding; [GO:0043226] organelle; [GO:0005929] cil…	HP:0000317:Facial myokymia; HP:0000317:Facial myokymia; HP:0002310:Orofacial dyskinesia; HP:0002322:Resting tremor; HP:0002322:Resting tremor; HP:0002509:Limb hypertonia; HP:0002509:Limb hypertonia; HP:0003621:Juvenile onset; HP:0002194:Delayed gross motor development; HP:0008936:Muscular hypotonia of the trunk; HP:0008936:Muscular hypotonia of the trunk; HP:0002072:Chorea; HP:0002072:Chorea; HP:…	Dyskinesia, Familial, with Facial Myokymia; Autoimmune encephalopathy with parasomnia and obstructive sleep apnea; Chorea, Benign Familial; Facial Myokymia; Upper limb hypertonia; Alternating hemiplegia of childhood; Athetoid cerebral palsy; Ocular Motility Disorders; Benign Hereditary Chorea; Ataxic; Myokymia; Glucose tolerance test; Myoclonic dystonia; Motor Disorders; Lingual-Facial-Buccal Dys…		ADCY5	0	0	0	0	0	0	0	0	0	0	0	0	0	0	1	0
112	ADCY6	1	1	1	0	1	1	1	1	1	1	9	27	0		ADCY6	adenylate cyclase 6	GO:1904116 response to vasopressin;GO:1904117 cellular response to vasopressin;GO:0035811 negative regulation of urine volume	GO:0032420 stereocilium;GO:0032421 stereocilium bundle;GO:0098862 cluster of actin-based cell projections	GO:0004016 adenylate cyclase activity;GO:0009975 cyclase activity;GO:0016849 phosphorus-oxygen lyase activity	This gene encodes a member of the adenylyl cyclase family of proteins, which are required for the synthesis of cyclic AMP. All members of this family have an intracellular N-terminus, a tandem repeat of six transmembrane domains separated by a cytoplasmic loop, and a C-terminal cytoplasmic domain. The two cytoplasmic regions bind ATP and form the catalytic core of the protein. Adenylyl cyclases a…		(hsa04962)Vasopressin-regulated water reabsorption; (hsa04913)Ovarian steroidogenesis; (hsa04961)Endocrine and other factor-regulated calcium reabsorption	antibody: Most normal tissues showed weak to moderate cytoplasmic positivity. Airway epithelium, purkinje cells, adrenal cortical cells and exocrine pancreatic cells were strongly immunoreactive. Cells in CNS and lymphoreticular tissue generally showed weak staining or were negative.; Cytoplasmic expression in most tissues.	Distribution: Detected in all; Specificity: Low tissue specificity	chr12:48789089-48766194	Human disease related genes:Congenital malformations:Congenital malformations of the musculoskeletal system; ENZYME proteins:Lyases; Disease related genes; Potential drug targets; Enzymes; Predicted intracellular proteins	Golgi apparatus (Approved)	[GO:0005575] cellular_component; [GO:0005886] plasma membrane; [GO:0008150] biological_process; [GO:0007165] signal transduction; [GO:0009058] biosynthetic process; [GO:0044281] small molecule metabolic process; [GO:0034641] cellular nitrogen compound metabolic process; [GO:0003674] molecular_function; [GO:0016829] lyase activity; [GO:0043167] ion binding; [GO:0043226] organelle; [GO:0005929] cil…	HP:0001349:Facial diplegia; HP:0200136:Oral-pharyngeal dysphagia; HP:0001376:Limitation of joint mobility; HP:0001315:Reduced tendon reflexes; HP:0003457:EMG abnormality; HP:0002804:Arthrogryposis multiplex congenita; HP:0002098:Respiratory distress; HP:0001284:Areflexia; HP:0001290:Generalized hypotonia; HP:0001252:Hypotonia; HP:0000007:Autosomal recessive inheritance	LETHAL CONGENITAL CONTRACTURE SYNDROME 8; Alkalosis; Facial diplegia; Oropharyngeal Dysphagia; Other ureteric obstruction; Nephrogenic Diabetes Insipidus; Limitation of joint mobility; Cystic kidney; Reduced tendon reflexes; Electromyogram abnormal; Thyroid Nodule; Arthrogryposis; Absent reflex; Cholera; Respiratory distress; Nodule; Polycystic Kidney, Autosomal Dominant; Left Ventricular Hypertr…		ADCY6	0	0	0	0	0	0	0	0	0	0	0	0	0	0	0	0
113	ADCY7	1	1	1	1	0	0	0	0	1	0	5	5	0		ADCY7	adenylate cyclase 7	GO:0006171 cAMP biosynthetic process;GO:0071285 cellular response to lithium ion;GO:0071361 cellular response to ethanol	GO:0005887 integral component of plasma membrane;GO:0031226 intrinsic component of plasma membrane;GO:0016021 integral component of membrane	GO:0004016 adenylate cyclase activity;GO:0009975 cyclase activity;GO:0016849 phosphorus-oxygen lyase activity	This gene encodes a membrane-bound adenylate cyclase that catalyses the formation of cyclic AMP from ATP and is inhibitable by calcium. The product of this gene is a member of the adenylyl cyclase class-4/guanylyl cyclase enzyme family that is characterized by the presence of twelve membrane-spanning domains in its sequences. Several transcript variants have been observed for this gene, but the f…		(hsa04913)Ovarian steroidogenesis; (hsa04923)Regulation of lipolysis in adipocytes; (hsa04213)Longevity regulating pathway - multiple species	Cytoplasmic expression in selected tissues.	Distribution: Detected in many; Specificity: Low tissue specificity	chr16:50246138-50318135	Enzymes; ENZYME proteins:Lyases; Predicted intracellular proteins	Cytosol (Approved)	[GO:0005575] cellular_component; [GO:0008150] biological_process; [GO:0007165] signal transduction; [GO:0009058] biosynthetic process; [GO:0044281] small molecule metabolic process; [GO:0034641] cellular nitrogen compound metabolic process; [GO:0003674] molecular_function; [GO:0043167] ion binding; [GO:0016829] lyase activity; [GO:0005886] plasma membrane; [GO:0006950] response to stress; [GO:000…		AUTOIMMUNE DISEASE, MULTISYSTEM, INFANTILE-ONSET, 1; AUTOIMMUNE DISEASE, MULTISYSTEM, INFANTILE-ONSET, 2; AUTOIMMUNE DISEASE, SUSCEPTIBILITY TO, 6; Polyarthritis, Juvenile, Rheumatoid Factor Negative; Polyarthritis, Juvenile, Rheumatoid Factor Positive; Acute Myeloid Leukemia, M1; Juvenile psoriatic arthritis; Acute Myeloid Leukemia (AML-M2); Autoimmune thyroiditis; Juvenile-Onset Still Disease; …		ADCY7	0	0	0	0	0	0	0	0	0	0	0	0	0	0	0	0
117	ADCYAP1R1	0	0	0	0	0	0	0	0	0	1	1	1	0		ADCYAP1R1	ADCYAP receptor type I	GO:0060732 positive regulation of inositol phosphate biosynthetic process;GO:0043950 positive regulation of cAMP-mediated signaling;GO:0010919 regulation of inositol phosphate biosynthetic process	GO:0005791 rough endoplasmic reticulum;GO:0005901 caveola;GO:0044853 plasma membrane raft	GO:0004999 vasoactive intestinal polypeptide receptor activity;GO:0008179 adenylate cyclase binding;GO:0042923 neuropeptide binding	This gene encodes type I adenylate cyclase activating polypeptide receptor, which is a membrane-associated protein and shares significant homology with members of the glucagon/secretin receptor family. This receptor mediates diverse biological actions of adenylate cyclase activating polypeptide 1 and is positively coupled to adenylate cyclase. Multiple alternatively spliced transcript variants en…	brain	(hsa04924)Renin secretion; (hsa04911)Insulin secretion; (hsa04713)Circadian entrainment	Cytoplasmic expression mainly in CNS and subset of cells in adrenal gland.	Distribution: Detected in many; Specificity: Tissue enriched	chr7:31052308-31111474	G-protein coupled receptors:GPCRs excl olfactory receptors; Transporters; Predicted intracellular proteins; G-protein coupled receptors:Family 2 (B) receptors	Vesicles (Enhanced)	[GO:0008150] biological_process; [GO:0007165] signal transduction; [GO:0005575] cellular_component; [GO:0003674] molecular_function; [GO:0005622] intracellular anatomical structure; [GO:0043226] organelle; [GO:0005886] plasma membrane; [GO:0030154] cell differentiation; [GO:0000003] reproduction; [GO:0019899] enzyme binding; [GO:0006810] transport; [GO:0042592] homeostatic process; [GO:0006950] r…		Vitamin B6 measurement; Psychological Trauma; Headache Disorders; POPLITEAL PTERYGIUM SYNDROME, LETHAL TYPE; Phobic anxiety disorder; Symptoms of stress; Cluster Headache; Pheochromocytoma, Extra-Adrenal; Congenital Hydrocephalus; Anxiety and fear; Upper Respiratory Infections; Leukemia, Large Granular Lymphocytic; Carcinoma, Pancreatic Ductal; Generalized Anxiety Disorder; Interstitial Cystitis;…		ADCYAP1R1	0	0	0	0	0	0	0	0	0	0	0	0	0	0	0	0
123	PLIN2	0	0	0	0	0	0	0	1	0	0	1	2	0		PLIN2	perilipin 2	GO:0010890 positive regulation of sequestering of triglyceride;GO:0010889 regulation of sequestering of triglyceride;GO:0010884 positive regulation of lipid storage	GO:0005811 lipid droplet;GO:0005783 endoplasmic reticulum;GO:0005576 extracellular region	GO:0005515 protein binding;GO:0005488 binding;GO:0003674 molecular_function	The protein encoded by this gene belongs to the perilipin family, members of which coat intracellular lipid storage droplets. This protein is associated with the lipid globule surface membrane material, and maybe involved in development and maintenance of adipose tissue. However, it is not restricted to adipocytes as previously thought, but is found in a wide range of cultured cell lines, includi…		(hsa03320)PPAR signaling pathway	antibody: Adrenocortical cells and testis displayed strong cytoplasmic staining. Lactating breast showed strong membranous positivity in glandular cells. Respiratory epithelia, neuronal cells of cerebral cortex, esophagus, rectum, skeletal muscle cells and small intestine were moderately positive. Remaining normal tissues were weakly stained or negative.; Cytoplasmic and membranous expression in …	Distribution: Detected in all; Specificity: Tissue enhanced	chr9:19127518-19108391	Predicted intracellular proteins	Lipid droplets (Supported)	[GO:0005575] cellular_component; [GO:0003674] molecular_function; [GO:0005622] intracellular anatomical structure; [GO:0043226] organelle; [GO:0005811] lipid droplet; [GO:0005886] plasma membrane; [GO:0005737] cytoplasm; [GO:0005829] cytosol; [GO:0008150] biological_process; [GO:0005783] endoplasmic reticulum; [GO:0005576] extracellular region; [GO:0006810] transport; [GO:0005634] nucleus		Eccrine epithelioma; Acrodermatitis enteropathica; Phospholipidosis; Primary Cutaneous Mucinous Carcinoma; Apocrine Carcinoma; Placental Choriocarcinoma; Mammary Analogue Secretory Carcinoma; Secretory breast carcinoma; Liposarcoma, Pleomorphic; Sebaceous Adenocarcinoma; Triglyceride storage disease with ichthyosis; Lipoidosis; Leukemia, Plasma Cell; Perianal Squamous Intraepithelial Neoplasia; B…		PLIN2	0	0	0	0	0	0	0	0	0	0	0	0	0	0	0	0
124	ADH1A	0	0	0	0	0	0	0	0	1	0	1	1	0		ADH1A	alcohol dehydrogenase 1A (class I), alpha polypeptide	GO:0006069 ethanol oxidation;GO:0006067 ethanol metabolic process;GO:0042573 retinoic acid metabolic process	GO:0005654 nucleoplasm;GO:0031981 nuclear lumen;GO:0005829 cytosol	GO:0004024 alcohol dehydrogenase activity, zinc-dependent;GO:0004022 alcohol dehydrogenase (NAD+) activity;GO:0018455 alcohol dehydrogenase [NAD(P)+] activity	This gene encodes a member of the alcohol dehydrogenase family. The encoded protein is the alpha subunit of class I alcohol dehydrogenase, which consists of several homo- and heterodimers of alpha, beta and gamma subunits. Alcohol dehydrogenases catalyze the oxidation of alcohols to aldehydes. This gene is active in the liver in early fetal life but only weakly active in adult liver. This gene is…	liver	(hsa00350)Tyrosine metabolism; (hsa00071)Fatty acid degradation; (hsa00620)Pyruvate metabolism	Selective cytoplasmic expression in hepatocytes.; antibody: Adipocytes and fibroblasts showed strong staining while pneumocytes displayed strong membranous positivity. Hepatocytes, gastrointestinal tract and respiratory epithelia exhibited moderate cytoplasmic staining while gall bladder showed moderate cytoplasmic and membranous staining. Remaining normal tissues were negative.	Distribution: Detected in some; Specificity: Tissue enriched	chr4:99290985-99276369	Enzymes; FDA approved drug targets:Small molecule drugs; Predicted intracellular proteins; ENZYME proteins:Oxidoreductases	Cytosol;Plasma membrane (Approved)	[GO:0003674] molecular_function; [GO:0043167] ion binding; [GO:0016491] oxidoreductase activity; [GO:0005575] cellular_component; [GO:0005622] intracellular anatomical structure; [GO:0005737] cytoplasm; [GO:0043226] organelle; [GO:0005634] nucleus; [GO:0005654] nucleoplasm; [GO:0005829] cytosol; [GO:0005886] plasma membrane; [GO:0008150] biological_process; [GO:0044281] small molecule metabolic p…		Advanced Cutaneous Melanoma of the Extremity; LDLR mutation; Xanthoma tendinosum; Familial hypercholesterolemia - homozygous; Autosomal dominant hypocalcemia; Pharyngeal Carcinoma; Malignant neoplasm of pharynx; Oral candidiasis; Polyglandular Type I Autoimmune Syndrome; Atypical Ductal Breast Hyperplasia; Hypoparathyroidism; Hypocalcemia; Substance Dependence; Polyendocrinopathies, Autoimmune; E…		ADH1A	0	0	0	0	0	0	0	0	0	0	0	0	0	0	0	0
127	ADH4	0	1	0	0	0	0	0	1	0	0	2	2	0		ADH4	alcohol dehydrogenase 4 (class II), pi polypeptide	GO:0046294 formaldehyde catabolic process;GO:0046292 formaldehyde metabolic process;GO:0010430 fatty acid omega-oxidation	GO:0005654 nucleoplasm;GO:0031981 nuclear lumen;GO:0005829 cytosol	GO:0051903 S-(hydroxymethyl)glutathione dehydrogenase activity;GO:0035276 ethanol binding;GO:0003960 NADPH:quinone reductase activity	This gene encodes class II alcohol dehydrogenase 4 pi subunit, which is a member of the alcohol dehydrogenase family. Members of this enzyme family metabolize a wide variety of substrates, including ethanol, retinol, other aliphatic alcohols, hydroxysteroids, and lipid peroxidation products. Class II alcohol dehydrogenase is a homodimer composed of 2 pi subunits. It exhibits a high activity for o…	liver	(hsa00350)Tyrosine metabolism; (hsa00071)Fatty acid degradation; (hsa00620)Pyruvate metabolism	Selective expression in liver and small intestines.; antibody: Moderate cytoplasmic positivity in hepatocytes. Enteroendrocrine cells in small intestines showed moderate to strong cytoplasmic and nuclear staining. Essentially all remaining tissues were negative.	Distribution: Detected in some; Specificity: Tissue enriched	chr4:99144297-99123658	Enzymes; Predicted intracellular proteins; ENZYME proteins:Oxidoreductases	Cytosol;Nucleoplasm (Uncertain)	[GO:0003674] molecular_function; [GO:0043167] ion binding; [GO:0016491] oxidoreductase activity; [GO:0008150] biological_process; [GO:0044281] small molecule metabolic process; [GO:0006091] generation of precursor metabolites and energy; [GO:0005575] cellular_component; [GO:0005622] intracellular anatomical structure; [GO:0005737] cytoplasm; [GO:0043226] organelle; [GO:0005634] nucleus; [GO:00056…		Radial scar; Flat Ductal Epithelial Atypia of the Breast; Pharyngeal Carcinoma; Malignant neoplasm of pharynx; Cluster Headache; Alcohol-Induced Disorders; Alcohol-Related Disorders; Pancreatitis, Alcoholic; Flushing; Liver Cirrhosis, Alcoholic; Withdrawal Symptoms; Alcohol abuse; Substance Dependence; Enzyme inhibition disorder; Malignant Squamous Cell Neoplasm; Alcoholic Liver Diseases; Alcohol…		ADH4	0	0	0	0	0	0	0	0	0	0	0	0	0	0	0	0
128	ADH5	0	0	0	0	0	0	0	0	1	0	1	1	0		ADH5	alcohol dehydrogenase 5 (class III), chi polypeptide	GO:0046294 formaldehyde catabolic process;GO:0046292 formaldehyde metabolic process;GO:0010430 fatty acid omega-oxidation	GO:0005739 mitochondrion;GO:0070062 extracellular exosome;GO:1903561 extracellular vesicle	GO:0018467 formaldehyde dehydrogenase activity;GO:0106321 S-(hydroxymethyl)glutathione dehydrogenase NADP activity;GO:0106322 S-(hydroxymethyl)glutathione dehydrogenase NAD activity	This gene encodes a member of the alcohol dehydrogenase family. Members of this family metabolize a wide variety of substrates, including ethanol, retinol, other aliphatic alcohols, hydroxysteroids, and lipid peroxidation products. The encoded protein forms a homodimer. It has virtually no activity for ethanol oxidation, but exhibits high activity for oxidation of long-chain primary alcohols and …		(hsa00350)Tyrosine metabolism; (hsa00071)Fatty acid degradation; (hsa00620)Pyruvate metabolism	antibody: Normal tissues displayed weak to moderate cytoplasmic staining. Epididymis, renal tubules, hepatocytes, smooth muscle cells and testis were strongly stained. Hematopoietic cells, cerebellum, glial cells and lymphoid tissue were negative.; General cytoplasmic expression.	Distribution: Detected in all; Specificity: Low tissue specificity	chr4:99088788-99070978	Enzymes; Predicted intracellular proteins; ENZYME proteins:Oxidoreductases		[GO:0003674] molecular_function; [GO:0043167] ion binding; [GO:0016491] oxidoreductase activity; [GO:0008150] biological_process; [GO:0044281] small molecule metabolic process; [GO:0006091] generation of precursor metabolites and energy; [GO:0005575] cellular_component; [GO:0005622] intracellular anatomical structure; [GO:0005737] cytoplasm; [GO:0005829] cytosol; [GO:0043226] organelle; [GO:00055…	HP:0032524:Long thumb; HP:0033044:Motor regression; HP:0010984:Digenic inheritance; HP:0000835:Adrenal hypoplasia; HP:0000013:Hypoplasia of the uterus; HP:0005301:Persistent left superior vena cava; HP:0004808:Acute myeloid leukemia; HP:0000953:Hyperpigmentation of the skin; HP:0005528:Bone marrow hypocellularity; HP:0002863:Myelodysplasia; HP:0001882:Leukopenia; HP:0000506:Telecanthus; HP:000026…	Hyperthyroxinemia; Hyperthyroxinemia, Familial Dysalbuminemic; Acute on chronic pancreatitis; Sjogren-Larsson Syndrome; Pharyngeal Carcinoma; Malignant neoplasm of pharynx; Folic Acid Deficiency; Malignant neoplasm of oropharynx; Oropharyngeal Carcinoma; Liver Cirrhosis, Alcoholic; Alcohol abuse; Hypogonadotropic hypogonadism; Malignant Squamous Cell Neoplasm; Alcoholic Liver Diseases; Rhinovirus…	DOID:0080952 AMED syndrome	ADH5	0	0	0	0	0	0	0	0	0	0	0	0	0	0	0	0
133	ADM	0	1	1	0	0	0	0	0	1	1	4	10	0		ADM	adrenomedullin	GO:2000184 positive regulation of progesterone biosynthetic process;GO:2000182 regulation of progesterone biosynthetic process;GO:1990410 adrenomedullin receptor signaling pathway	GO:0005615 extracellular space;GO:0005576 extracellular region;GO:0005737 cytoplasm	GO:0031700 adrenomedullin receptor binding;GO:0005179 hormone activity;GO:0001664 G protein-coupled receptor binding	The protein encoded by this gene is a preprohormone which is cleaved to form two biologically active peptides, adrenomedullin and proadrenomedullin N-terminal 20 peptide. Adrenomedullin is a 52 aa peptide with several functions, including vasodilation, regulation of hormone secretion, promotion of angiogenesis, and antimicrobial activity. The antimicrobial activity is antibacterial, as the peptid…	placenta	(hsa04270)Vascular smooth muscle contraction; (hsa04080)Neuroactive ligand-receptor interaction	Extracellular positivity in most tissues, including placenta and endothelial cells.; antibody: Subsets of cells in bone marrow and the red pulp of spleen as well as gastric parietal and chief cells showed strong cytoplasmic staining. Moderate positivity was observed in male genitalia, endometrium, thyroid and renal tubules. Remaining normal tissues were generally negative.	Distribution: Detected in all; Specificity: Tissue enhanced	chr11:10305073-10307397	Predicted secreted proteins; Predicted intracellular proteins; Cancer-related genes:Candidate cancer biomarkers		[GO:0005575] cellular_component; [GO:0005576] extracellular region; [GO:0003674] molecular_function; [GO:0008150] biological_process; [GO:0007165] signal transduction; [GO:0005622] intracellular anatomical structure; [GO:0005737] cytoplasm; [GO:0005615] extracellular space; [GO:0006810] transport; [GO:0016192] vesicle-mediated transport; [GO:0006950] response to stress; [GO:0048856] anatomical st…		Macular fibrosis; Peripheral Vascular Insufficiency; Swelling of limb; Ulnar Neuropathies; Fibrothecoma; Renal artery occlusion; Acute dyspnea; Retinal Necrosis Syndrome, Acute; Orthostasis; Presyncope; Acute abdominal pain; Severe hypoxic ischemic encephalopathy; Abdominal wall defect; Chronic cerebral ischemia; Medullary Neoplasms; Starvation; Chronic acquired lymphedema; Hemodynamic instabilit…		ADM	0	0	0	0	0	0	0	0	0	0	0	0	0	0	0	0
135	ADORA2A	0	0	1	0	0	0	0	0	0	0	1	1	0		ADORA2A	adenosine A2a receptor	GO:0014057 positive regulation of acetylcholine secretion, neurotransmission;GO:0014056 regulation of acetylcholine secretion, neurotransmission;GO:0032224 positive regulation of synaptic transmission, cholinergic	GO:0030673 axolemma;GO:0032589 neuron projection membrane;GO:0044304 main axon	GO:0001609 G protein-coupled adenosine receptor activity;GO:0031802 type 5 metabotropic glutamate receptor binding;GO:0035256 G protein-coupled glutamate receptor binding	This gene encodes a member of the guanine nucleotide-binding protein (G protein)-coupled receptor (GPCR) superfamily, which is subdivided into classes and subtypes. The receptors are seven-pass transmembrane proteins that respond to extracellular cues and activate intracellular signal transduction pathways. This protein, an adenosine receptor of A2A subtype, uses adenosine as the preferred endoge…	lymph_node	(hsa04270)Vascular smooth muscle contraction; (hsa05034)Alcoholism; (hsa04015)Rap1 signaling pathway	antibody: Moderate positivity was observed in subset of cells in thymus. Strong staining was detected in neuropil and subset of neuronal cells in caudate. Remaining normal cells were negative.; Expression in caudate nucleus and a subset of cells in thymus.	Distribution: Detected in many; Specificity: Tissue enhanced	chr22:24423597-24442357	Transporters; FDA approved drug targets:Small molecule drugs; Cancer-related genes:Mutational cancer driver genes; G-protein coupled receptors:Adenosine and adenine nucleotide receptors; G-protein coupled receptors:GPCRs excl olfactory receptors; Predicted intracellular proteins		[GO:0008150] biological_process; [GO:0007165] signal transduction; [GO:0005575] cellular_component; [GO:0003674] molecular_function; [GO:0005886] plasma membrane; [GO:0019899] enzyme binding; [GO:0006950] response to stress; [GO:0007267] cell-cell signaling; [GO:0048856] anatomical structure development; [GO:0008219] cell death; [GO:0050877] nervous system process; [GO:0003013] circulatory system…	HP:0011665:Takotsubo cardiomyopathy; HP:0031691:Severe viral infection; HP:0032308:Increased circulating procalcitonin concentration; HP:0033349:Seizure cluster; HP:0012705:Abnormal metabolic brain imaging by MRS; HP:0007738:Uncontrolled eye movements; HP:0007103:Hypointensity of cerebral white matter on MRI; HP:0031475:Status epilepticus without prominent motor symptoms; HP:0011172:Complex febri…	Anxious personality; Nonorganic Insomnia; Rebound Insomnia; Secondary Insomnia; Sleep Initiation Dysfunction; Transient Insomnia; Psychophysiological Insomnia; Chronic Insomnia; Primary Insomnia; Acute encephalopathy with biphasic seizures and late reduced diffusion; Coarse Tremor; Continuous Tremor; Darkness Tremor; Fine Tremor; Intermittent Tremor; Massive Tremor; Nerve Tremors; Passive Tremor;…		ADORA2A	0	0	0	0	0	0	0	0	0	0	0	0	0	0	0	0
142	PARP1	0	0	1	0	0	0	0	1	1	0	3	3	0		PARP1	poly(ADP-ribose) polymerase 1	GO:0018424 peptidyl-glutamic acid poly-ADP-ribosylation;GO:1903518 positive regulation of single strand break repair;GO:1904762 positive regulation of myofibroblast differentiation	GO:0035861 site of double-strand break;GO:0090734 site of DNA damage;GO:0000781 chromosome, telomeric region	GO:0140294 NAD DNA ADP-ribosyltransferase activity;GO:1990404 protein ADP-ribosylase activity;GO:0003950 NAD+ ADP-ribosyltransferase activity	This gene encodes a chromatin-associated enzyme, poly(ADP-ribosyl)transferase, which modifies various nuclear proteins by poly(ADP-ribosyl)ation. The modification is dependent on DNA and is involved in the regulation of various important cellular processes such as differentiation, proliferation, and tumor transformation and also in the regulation of the molecular events involved in the recovery o…		(hsa03410)Base excision repair; (hsa04064)NF-kappa B signaling pathway; (hsa04210)Apoptosis	Nuclear expression in all tissues, most abundant in lymphoid cells.; antibody: Apoptotic cells in germinal centers of lymphatic tissues showed strong nuclear positivity. Bone marrow and placenta showed moderate nuclear positivity.	Distribution: Detected in all; Specificity: Low tissue specificity	chr1:226408093-226360691	FDA approved drug targets:Small molecule drugs; Cancer-related genes:Candidate cancer biomarkers; Enzymes; Predicted intracellular proteins; ENZYME proteins:Transferases	Nucleoplasm (Enhanced); Additional: Nucleoli	[GO:0003674] molecular_function; [GO:0003677] DNA binding; [GO:0043167] ion binding; [GO:0005575] cellular_component; [GO:0005622] intracellular anatomical structure; [GO:0043226] organelle; [GO:0005634] nucleus; [GO:0008150] biological_process; [GO:0006464] cellular protein modification process; [GO:0016757] glycosyltransferase activity; [GO:0005694] chromosome; [GO:0003723] RNA binding; [GO:000…		Classic medulloblastoma; Estrogen receptor positive tumor; Large cell medulloblastoma; WARSAW BREAKAGE SYNDROME; Arterial Fatty Streak; Atelosteogenesis type 2; Atheroma; Chicken Lymphoma; Plaque, Atherosclerotic; BRACHYDACTYLY, TYPE B1; Apoptotic DNA damage; Tumour ulceration; Cytomegalovirus encephalitis; Fibroatheroma; Skin Papilloma; Small cell carcinoma of esophagus; Grade III Chondrosarcoma…		PARP1	0	0	0	0	0	0	0	0	0	0	0	0	0	0	0	0
143	PARP4	1	1	1	1	0	1	0	1	1	1	8	52	1	R-HSA-9678108,R-HSA-9694516,R-HSA-9679506	PARP4	poly(ADP-ribose) polymerase family member 4	GO:0140289 protein mono-ADP-ribosylation;GO:0006471 protein ADP-ribosylation;GO:0051972 regulation of telomerase activity	GO:0005876 spindle microtubule;GO:0005819 spindle;GO:0005874 microtubule	GO:1990404 protein ADP-ribosylase activity;GO:0003950 NAD+ ADP-ribosyltransferase activity;GO:0016763 pentosyltransferase activity	This gene encodes poly(ADP-ribosyl)transferase-like 1 protein, which is capable of catalyzing a poly(ADP-ribosyl)ation reaction. This protein has a catalytic domain which is homologous to that of poly (ADP-ribosyl) transferase, but lacks an N-terminal DNA binding domain which activates the C-terminal catalytic domain of poly (ADP-ribosyl) transferase. Since this protein is not capable of binding …		(hsa03410)Base excision repair; (hsa04210)Apoptosis	General cytoplasmic expression, additional expression in lymphoid cells in several tissues.; antibody: Most normal tissues showed weak to moderate cytoplasmic positivity. In addition, nuclear positivity was observed in a few cases, for example in chief cells in the gastric mucosa. Cortical cells of adrenal gland, bone marrow poetic cells, macrophages and skeletal myocytes were strongly stained.	Distribution: Detected in all; Specificity: Low tissue specificity	chr13:24512993-24420930	Predicted intracellular proteins	Nucleoplasm (Supported); Additional: Cytosol	[GO:0008150] biological_process; [GO:0006464] cellular protein modification process; [GO:0003674] molecular_function; [GO:0016757] glycosyltransferase activity; [GO:0005575] cellular_component; [GO:0005622] intracellular anatomical structure; [GO:0043226] organelle; [GO:0005634] nucleus; [GO:0005737] cytoplasm; [GO:0005829] cytosol; [GO:0005856] cytoskeleton; [GO:0006950] response to stress; [GO:…		Sudden Cardiac Arrest; Pseudotumor Cerebri; Hereditary Malignant Neoplasm; Sudden Cardiac Death; Thyroid Diseases; Complete Trisomy 21 Syndrome; Down Syndrome; Colonic Neoplasms; Malignant neoplasm of thyroid; Thyroid Neoplasm; Thyroid carcinoma; Lymphoma; Childhood Leukemia; Squamous cell carcinoma of esophagus; leukemia; Malignant neoplasm of pancreas; Pancreatic carcinoma; Malignant tumor of c…		PARP4	0	0	0	1	0	0	0	0	0	0	0	0	1	0	0	0
146	ADRA1D	1	1	1	0	1	0	0	1	1	1	7	18	0		ADRA1D	adrenoceptor alpha 1D	GO:0150099 neuron-glial cell signaling;GO:0001996 positive regulation of heart rate by epinephrine-norepinephrine;GO:0003321 positive regulation of blood pressure by epinephrine-norepinephrine	GO:0005887 integral component of plasma membrane;GO:0031226 intrinsic component of plasma membrane;GO:0016021 integral component of membrane	GO:0004937 alpha1-adrenergic receptor activity;GO:0004936 alpha-adrenergic receptor activity;GO:0004935 adrenergic receptor activity	Alpha-1-adrenergic receptors (alpha-1-ARs) are members of the G protein-coupled receptor superfamily. They activate mitogenic responses and regulate growth and proliferation of many cells. There are 3 alpha-1-AR subtypes: alpha-1A, -1B and -1D, all of which signal through the Gq/11 family of G-proteins and different subtypes show different patterns of activation. This gene encodes alpha-1D-adrene…		(hsa04970)Salivary secretion; (hsa04270)Vascular smooth muscle contraction; (hsa04261)Adrenergic signaling in cardiomyocytes	Estimation of protein expression could not be performed. View primary data.; antibody: Strong cytoplasmic positivity was observed in renal tubules. Lung macrophages, duodenum, adrenal cortex, heart and skeletal myocytes showed moderate cytoplasmic staining. Moderate cytoplasmic and nuclear positivity was observed in the liver. Remaining normal tissues were weakly stained or negative.	Distribution: Detected in many; Specificity: Tissue enhanced	chr20:4249287-4220630	G-protein coupled receptors:GPCRs excl olfactory receptors; FDA approved drug targets:Small molecule drugs		[GO:0008150] biological_process; [GO:0007165] signal transduction; [GO:0005575] cellular_component; [GO:0003674] molecular_function; [GO:0005886] plasma membrane; [GO:0007267] cell-cell signaling; [GO:0003013] circulatory system process; [GO:0042592] homeostatic process; [GO:0008283] cell population proliferation		GENERALIZED EPILEPSY WITH FEBRILE SEIZURES PLUS, TYPE 2; Stage IV Esophageal Squamous Cell Carcinoma; Delusional disorder; Nesidioblastosis; Oculo-dento-digital syndrome; Generalized Epilepsy with Febrile Seizures Plus; Vasovagal syncope; Heart Failure, Diastolic; EPILEPTIC ENCEPHALOPATHY, EARLY INFANTILE, 2; Keratosis Follicularis; Infantile Severe Myoclonic Epilepsy; Chronic interstitial cystit…		ADRA1D	0	0	0	0	0	0	0	0	0	0	0	0	0	0	0	0
150	ADRA2A	0	1	0	0	0	0	0	0	0	1	2	2	0		ADRA2A	adrenoceptor alpha 2A	GO:0070473 negative regulation of uterine smooth muscle contraction;GO:0071881 adenylate cyclase-inhibiting adrenergic receptor signaling pathway;GO:0071882 phospholipase C-activating adrenergic receptor signaling pathway	GO:0098691 dopaminergic synapse;GO:0099059 integral component of presynaptic active zone membrane;GO:0098945 intrinsic component of presynaptic active zone membrane	GO:0031692 alpha-1B adrenergic receptor binding;GO:0031696 alpha-2C adrenergic receptor binding;GO:0004938 alpha2-adrenergic receptor activity	Alpha-2-adrenergic receptors are members of the G protein-coupled receptor superfamily. The alpha-2-adrenergic receptors are a type of adrenergic receptors (for adrenaline or epinephrine), which inhibit adenylate cyclase. These receptors include 3 highly homologous subtypes: alpha2A, alpha2B, and alpha2C. They are involved in regulating the release of neurotransmitter molecules from sympathetic n…		(hsa04022)cGMP-PKG signaling pathway; (hsa04080)Neuroactive ligand-receptor interaction		Distribution: Detected in many; Specificity: Tissue enhanced	chr10:111077029-111080907	G-protein coupled receptors:GPCRs excl olfactory receptors; Transporters; FDA approved drug targets:Small molecule drugs		[GO:0008150] biological_process; [GO:0007165] signal transduction; [GO:0005575] cellular_component; [GO:0003674] molecular_function; [GO:0006950] response to stress; [GO:0003013] circulatory system process; [GO:0005622] intracellular anatomical structure; [GO:0005737] cytoplasm; [GO:0005886] plasma membrane; [GO:0040011] locomotion; [GO:0048870] cell motility; [GO:0006464] cellular protein modifi…		Stress induced hyperglycaemia; Attention deficit hyperactivity disorder, combined type; Familial partial lipodystrophy; Alcoholic Steatohepatitis; Colitis, Microscopic; Asymmetric Septal Hypertrophy; Sialorrhea; Tic disorder; Thyrotoxicosis; Massive Osteolyses; Acth-Independent Macronodular Adrenal Hyperplasia; Acute onset pain; Gerstmann-Straussler-Scheinker Disease; Visceral Pain; Panic Attacks…		ADRA2A	0	0	0	0	0	0	0	0	0	0	0	0	0	0	1	0
152	ADRA2C	0	1	1	0	0	1	0	1	0	0	4	5	0		ADRA2C	adrenoceptor alpha 2C	GO:0010700 negative regulation of norepinephrine secretion;GO:0032811 negative regulation of epinephrine secretion;GO:0035624 receptor transactivation	GO:0005768 endosome;GO:0005887 integral component of plasma membrane;GO:0031226 intrinsic component of plasma membrane	GO:0004938 alpha2-adrenergic receptor activity;GO:0031694 alpha-2A adrenergic receptor binding;GO:0004936 alpha-adrenergic receptor activity	Alpha-2-adrenergic receptors are members of the G protein-coupled receptor superfamily. They include 3 highly homologous subtypes: alpha2A, alpha2B, and alpha2C. These receptors have a critical role in regulating neurotransmitter release from sympathetic nerves and from adrenergic neurons in the central nervous system. The mouse studies revealed that both the alpha2A and alpha2C subtypes were req…		(hsa04022)cGMP-PKG signaling pathway; (hsa04080)Neuroactive ligand-receptor interaction	antibody: Macrophages in lung, glandular cells in adrenals and few squamous cells in tonsil showed strong cytoplasmic positivity. Squamous epithelium, gastrointestinal tract, decidual cells, myocytes in heart and skeletal muscles showed weak to moderate cytoplasmic positivity. Other normal tissues were negative.; Estimation of protein expression could not be performed. View primary data.	Distribution: Detected in many; Specificity: Tissue enhanced	chr4:3766385-3768526	G-protein coupled receptors:GPCRs excl olfactory receptors; FDA approved drug targets:Small molecule drugs		[GO:0008150] biological_process; [GO:0007165] signal transduction; [GO:0005575] cellular_component; [GO:0003674] molecular_function; [GO:0006950] response to stress; [GO:0003013] circulatory system process; [GO:0005886] plasma membrane; [GO:0005622] intracellular anatomical structure; [GO:0005737] cytoplasm; [GO:0007267] cell-cell signaling; [GO:0006464] cellular protein modification process; [GO…		vasomotor symptom; Attention deficit hyperactivity disorder, combined type; Chronic systolic heart failure; Treatment-resistant schizophrenia; Functional Gastrointestinal Disorders; Torsades de Pointes; Cardiac Hypertrophy; Learning Disabilities; Heart Decompensation; Myocardial Failure; Left-Sided Heart Failure; Heart Failure, Right-Sided; Fibrosis; MAJOR AFFECTIVE DISORDER 2; Cardiomegaly; Cons…		ADRA2C	0	0	0	0	0	0	0	0	0	0	0	0	0	0	0	0
154	ADRB2	0	1	0	0	0	0	0	0	0	0	1	1	0		ADRB2	adrenoceptor beta 2	GO:0002032 desensitization of G protein-coupled receptor signaling pathway by arrestin;GO:0061885 positive regulation of mini excitatory postsynaptic potential;GO:0002025 norepinephrine-epinephrine-mediated vasodilation involved in regulation of systemic arterial blood pressure	GO:0030669 clathrin-coated endocytic vesicle membrane;GO:0045334 clathrin-coated endocytic vesicle;GO:0030665 clathrin-coated vesicle membrane	GO:0004941 beta2-adrenergic receptor activity;GO:0004939 beta-adrenergic receptor activity;GO:0051380 norepinephrine binding	This gene encodes beta-2-adrenergic receptor which is a member of the G protein-coupled receptor superfamily. This receptor is directly associated with one of its ultimate effectors, the class C L-type calcium channel Ca(V)1.2. This receptor-channel complex also contains a G protein, an adenylyl cyclase, cAMP-dependent kinase, and the counterbalancing phosphatase, PP2A. The assembly of the signal…		(hsa04923)Regulation of lipolysis in adipocytes; (hsa04924)Renin secretion; (hsa04970)Salivary secretion	antibody: Exocrine pancreas, microvilli of respiratory mucosa, fallopian tube and epididymis showed strong immunoreactivity. Remaining normal cells were weakly stained or negative.; Estimation of protein expression could not be performed. View primary data.	Distribution: Detected in many; Specificity: Low tissue specificity	chr5:148826611-148828623	Transporters; FDA approved drug targets:Small molecule drugs; Human disease related genes:Immune system diseases:Allergies and autoimmune diseases; Human disease related genes:Endocrine and metabolic diseases:Other endocrine and metabolic diseases; G-protein coupled receptors:GPCRs excl olfactory receptors	Cytosol (Uncertain)	[GO:0008150] biological_process; [GO:0007165] signal transduction; [GO:0005575] cellular_component; [GO:0003674] molecular_function; [GO:0003013] circulatory system process; [GO:0005886] plasma membrane; [GO:0005622] intracellular anatomical structure; [GO:0005737] cytoplasm; [GO:0043226] organelle; [GO:0005794] Golgi apparatus; [GO:0031410] cytoplasmic vesicle; [GO:0005768] endosome; [GO:0005773…	HP:4000007:Bronchoconstriction; HP:0012340:Decreased resting energy expenditure; HP:0010982:Polygenic inheritance; HP:0031819:Increased waist to hip ratio; HP:0001426:Multifactorial inheritance; HP:0002099:Asthma; HP:0001513:Obesity; HP:0000006:Autosomal dominant inheritance; HP:0000006:Autosomal dominant inheritance; HP:0000007:Autosomal recessive inheritance	Mild persistent asthma; Nocturnal cough; HIV-1-Associated Cognitive Motor Complex; Maternal Hypotension; Atopic IgE-mediated allergic disorder; Seasonal rhinitis; Ventricular failure; Loss of hypoglycemic warning; Respiratory tract infection viral; Abnormality of the thymus; Bakers' asthma; Fetal acidosis; Acute cardiac pulmonary edema; Status Asthmaticus; Coarse Tremor; Continuous Tremor; Darkne…	DOID:2841 asthma;DOID:9970 obesity	ADRB2	0	0	0	0	0	0	0	0	0	0	0	0	0	0	0	0
155	ADRB3	0	0	0	0	0	1	0	0	1	0	2	2	0		ADRB3	adrenoceptor beta 3	GO:0002025 norepinephrine-epinephrine-mediated vasodilation involved in regulation of systemic arterial blood pressure;GO:0001993 regulation of systemic arterial blood pressure by norepinephrine-epinephrine;GO:0071880 adenylate cyclase-activating adrenergic receptor signaling pathway	GO:0043235 receptor complex;GO:0005887 integral component of plasma membrane;GO:0031226 intrinsic component of plasma membrane	GO:0015052 beta3-adrenergic receptor activity;GO:0004939 beta-adrenergic receptor activity;GO:0051380 norepinephrine binding	The protein encoded by this gene belongs to the family of beta adrenergic receptors, which mediate catecholamine-induced activation of adenylate cyclase through the action of G proteins. This receptor is located mainly in the adipose tissue and is involved in the regulation of lipolysis and thermogenesis. Obesity and bodyweight-related disorders are correlated with certain polymorphisms in three …		(hsa04923)Regulation of lipolysis in adipocytes; (hsa04924)Renin secretion; (hsa04970)Salivary secretion	Expressed in caudate and adipose tissue.; antibody: Strong positivity was observed in processes in CNS. Other tissues were negative.	Distribution: Detected in some; Specificity: Tissue enhanced	chr8:37966599-37962990	G-protein coupled receptors:GPCRs excl olfactory receptors; FDA approved drug targets:Small molecule drugs; Human disease related genes:Endocrine and metabolic diseases:Other endocrine and metabolic diseases		[GO:0008150] biological_process; [GO:0007165] signal transduction; [GO:0005575] cellular_component; [GO:0003674] molecular_function; [GO:0005886] plasma membrane; [GO:0003013] circulatory system process; [GO:0005975] carbohydrate metabolic process; [GO:0042592] homeostatic process; [GO:0006091] generation of precursor metabolites and energy; [GO:0032991] protein-containing complex	HP:0012340:Decreased resting energy expenditure; HP:0010982:Polygenic inheritance; HP:0031819:Increased waist to hip ratio; HP:0001513:Obesity; HP:0000006:Autosomal dominant inheritance; HP:0000007:Autosomal recessive inheritance	Neurogenic bladder dysfunction; Congenital Generalized Lipodystrophy Type 2; Overactive bladder syndrome; Increased waist to hip ratio; Lipoatrophic Diabetes Mellitus; Decreased resting energy expenditure; Moderate obesity; Lipidemias; Tumour inflammation; Childhood Ganglioneuroblastoma; Lipomatosis, Multiple Symmetrical; Precocious pubarche; Left ventricular diastolic dysfunction; Microvascular …	DOID:9970 obesity	ADRB3	0	0	0	0	0	0	0	0	0	0	0	0	0	0	0	0
156	GRK2	0	0	0	0	0	0	0	1	0	0	1	2	0		GRK2	G protein-coupled receptor kinase 2	GO:0003108 negative regulation of the force of heart contraction by chemical signal;GO:1901081 negative regulation of relaxation of smooth muscle;GO:1901080 regulation of relaxation of smooth muscle	GO:0005929 cilium;GO:0045202 synapse;GO:0030054 cell junction	GO:0031753 endothelial differentiation G protein-coupled receptor binding;GO:0031755 Edg-2 lysophosphatidic acid receptor binding;GO:0047696 beta-adrenergic receptor kinase activity	This gene encodes a member of the G protein-coupled receptor kinase family of proteins. The encoded protein phosphorylates the beta-adrenergic receptor as well as a wide range of other substrates including non-GPCR cell surface receptors, and cytoskeletal, mitochondrial, and transcription factor proteins. Data from rodent models supports a role for this gene in embryonic development, heart functi…		(hsa04340)Hedgehog signaling pathway; (hsa05032)Morphine addiction; (hsa04724)Glutamatergic synapse	antibody: Lymphoid tissues showed moderate cytoplasmic positivity. Salivary gland, seminal vesicle and neurons showed strong nuclear positivity. Most remaining normal tissues were weakly stained or negative.; Cytoplasmic expression in all tissues, most abundant in immune cells.	Distribution: Detected in all; Specificity: Tissue enhanced	chr11:67266420-67286556	Enzymes; Kinases:AGC Ser/Thr protein kinases; Predicted intracellular proteins; ENZYME proteins:Transferases	Cytosol (Approved)	[GO:0003674] molecular_function; [GO:0043167] ion binding; [GO:0008150] biological_process; [GO:0007165] signal transduction; [GO:0016301] kinase activity; [GO:0006464] cellular protein modification process; [GO:0005575] cellular_component; [GO:0005622] intracellular anatomical structure; [GO:0005737] cytoplasm; [GO:0005886] plasma membrane; [GO:0003013] circulatory system process; [GO:0048856] a…		Rebound hypertension; Hypertensive left ventricular hypertrophy; Blastocyst Disintegration; Embryo Death; Embryo Disintegration; Embryo Resorption; physical symptom; Embryo Loss; Benign neoplasm of liver; Episodic ataxia type 1; Left ventricular diastolic dysfunction; Takotsubo Cardiomyopathy; Vascular anomaly; Sessile Serrated Adenoma/Polyp; Heart Failure, Systolic; Pulmonary Cystic Fibrosis; Re…		GRK2	0	0	0	0	0	0	0	0	0	0	0	0	0	0	0	0
157	GRK3	0	0	0	0	0	0	0	1	0	0	1	1	0		GRK3	G protein-coupled receptor kinase 3	GO:0002029 desensitization of G protein-coupled receptor signaling pathway;GO:0022401 negative adaptation of signaling pathway;GO:0023058 adaptation of signaling pathway	GO:0005829 cytosol;GO:0005886 plasma membrane;GO:0071944 cell periphery	GO:0047696 beta-adrenergic receptor kinase activity;GO:0004703 G protein-coupled receptor kinase activity;GO:0001664 G protein-coupled receptor binding	The beta-adrenergic receptor kinase specifically phosphorylates the agonist-occupied form of the beta-adrenergic and related G protein-coupled receptors. Overall, the beta adrenergic receptor kinase 2 has 85% amino acid similarity with beta adrenergic receptor kinase 1, with the protein kinase catalytic domain having 95% similarity. These data suggest the existence of a family of receptor kinases…		(hsa04340)Hedgehog signaling pathway; (hsa05032)Morphine addiction; (hsa04724)Glutamatergic synapse	antibody: Most normal cells showed moderate to strong nuclear staining. Liver and kidney were negative.; General nuclear expression.	Distribution: Detected in many; Specificity: Tissue enhanced	chr22:25564675-25729294	Enzymes; Kinases:AGC Ser/Thr protein kinases; Predicted intracellular proteins; ENZYME proteins:Transferases	Nucleoplasm (Approved); Additional: Plasma membrane	[GO:0003674] molecular_function; [GO:0043167] ion binding; [GO:0008150] biological_process; [GO:0007165] signal transduction; [GO:0016301] kinase activity; [GO:0006464] cellular protein modification process; [GO:0005575] cellular_component; [GO:0005886] plasma membrane; [GO:0005622] intracellular anatomical structure; [GO:0005737] cytoplasm; [GO:0005829] cytosol; [GO:0006810] transport; [GO:00161…		WHIM syndrome; Manic Disorder; Bipolar I disorder; Obsessive compulsive behavior; Ischemic cardiomyopathy; Depression, Bipolar; MAJOR AFFECTIVE DISORDER 8; MAJOR AFFECTIVE DISORDER 9; MAJOR AFFECTIVE DISORDER 7; Cocaine Abuse; MAJOR AFFECTIVE DISORDER 4; MAJOR AFFECTIVE DISORDER 6; MAJOR AFFECTIVE DISORDER 1; Manic; Atrial Premature Complexes; MAJOR AFFECTIVE DISORDER 2; Cocaine Dependence; Borde…		GRK3	0	0	0	0	0	0	0	0	0	0	0	0	0	0	0	0
158	ADSL	0	0	0	0	0	0	0	0	1	0	1	1	0		ADSL	adenylosuccinate lyase	GO:0044209 AMP salvage;GO:0006189 'de novo' IMP biosynthetic process;GO:0097292 XMP metabolic process	GO:0005829 cytosol;GO:0032991 protein-containing complex;GO:0005737 cytoplasm	GO:0004018 N6-(1,2-dicarboxyethyl)AMP AMP-lyase (fumarate-forming) activity;GO:0070626 (S)-2-(5-amino-1-(5-phospho-D-ribosyl)imidazole-4-carboxamido) succinate lyase (fumarate-forming) activity;GO:0016842 amidine-lyase activity	The protein encoded by this gene belongs to the lyase 1 family. It is an essential enzyme involved in purine metabolism, and catalyzes two non-sequential reactions in the de novo purine biosynthetic pathway: the conversion of succinylaminoimidazole carboxamide ribotide (SAICAR) to aminoimidazole carboxamide ribotide (AICAR) and the conversion of adenylosuccinate (S-AMP) to adenosine monophosphate…		(hsa00250)Alanine, aspartate and glutamate metabolism; (hsa00230)Purine metabolism; (hsa01240)Biosynthesis of cofactors	antibody: Most normal cells showed moderate to strong cytoplasmic and additional nuclear positivity. Cells in CNS were generally negative.; Ubiquitous cytoplasmic expression.	Distribution: Detected in all; Specificity: Group enriched	chr22:40346500-40387527	Human disease related genes:Congenital disorders of metabolism:Congenital disorders of nucleotide metabolism; ENZYME proteins:Lyases; Disease related genes; Potential drug targets; Enzymes; Predicted intracellular proteins	Cytosol (Enhanced)	[GO:0003674] molecular_function; [GO:0016829] lyase activity; [GO:0008150] biological_process; [GO:0009058] biosynthetic process; [GO:0044281] small molecule metabolic process; [GO:0034641] cellular nitrogen compound metabolic process; [GO:0005575] cellular_component; [GO:0005622] intracellular anatomical structure; [GO:0005737] cytoplasm; [GO:0005829] cytosol; [GO:0032991] protein-containing com…	HP:0007103:Hypointensity of cerebral white matter on MRI; HP:0040082:Happy demeanor; HP:0000748:Inappropriate laughter; HP:0006808:Cerebral hypomyelination; HP:0000742:Self-mutilation; HP:0002179:Opisthotonus; HP:0001348:Brisk reflexes; HP:0005487:Prominent metopic ridge; HP:0005487:Prominent metopic ridge; HP:0003429:CNS hypomyelination; HP:0005469:Flat occiput; HP:0000817:Poor eye contact; HP:0…	Adenylosuccinate lyase deficiency type 1; Adenylosuccinate lyase deficiency type 2; Adenylosuccinate lyase deficiency type 3; Adenylosuccinate lyase deficiency type 4; Adenylosuccinate lyase deficiency (disorder); Hypointensity of cerebral white matter on MRI; Phosphoribosylpyrophosphate Synthetase Superactivity; Inappropriate laughter; Argininosuccinic Aciduria; Combined molybdoflavoprotein enzy…	DOID:0050762 adenylosuccinase lyase deficiency	ADSL	0	0	0	0	0	0	0	0	0	0	0	0	0	0	0	0
160	AP2A1	0	0	0	0	0	1	0	0	0	0	1	1	1	R-HSA-9679191,R-HSA-9679506	AP2A1	adaptor related protein complex 2 subunit alpha 1	GO:1900126 negative regulation of hyaluronan biosynthetic process;GO:1900125 regulation of hyaluronan biosynthetic process;GO:0006895 Golgi to endosome transport	GO:0030122 AP-2 adaptor complex;GO:0030128 clathrin coat of endocytic vesicle;GO:0030130 clathrin coat of trans-Golgi network vesicle	GO:0035615 clathrin adaptor activity;GO:0140312 cargo adaptor activity;GO:0050750 low-density lipoprotein particle receptor binding	This gene encodes the alpha 1 adaptin subunit of the adaptor protein 2 (AP-2) complex found in clathrin coated vesicles. The AP-2 complex is a heterotetramer consisting of two large adaptins (alpha or beta), a medium adaptin (mu), and a small adaptin (sigma). The complex is part of the protein coat on the cytoplasmic face of coated vesicles which links clathrin to receptors in vesicles. Alternati…		(hsa04961)Endocrine and other factor-regulated calcium reabsorption; (hsa04721)Synaptic vesicle cycle; (hsa04144)Endocytosis	antibody: Weak to moderate cytoplasmic staining was observed in most normal tissues. Additional membranous positivity was observed in a few cases. Microvilli in trophoblastic cells showed distinct immunoreactivity. A subset of neuronal cells and cells in cerebellum were strongly stained. The liver, myocytes and glial cells were mainly negative.; General cytoplasmic and occasional membranous expre…	Distribution: Detected in all; Specificity: Low tissue specificity	chr19:49767001-49807114	Transporters; Predicted intracellular proteins	Vesicles (Supported)	[GO:0008150] biological_process; [GO:0006810] transport; [GO:0015031] protein transport; [GO:0016192] vesicle-mediated transport; [GO:0005575] cellular_component; [GO:0005622] intracellular anatomical structure; [GO:0032991] protein-containing complex; [GO:0005737] cytoplasm; [GO:0003674] molecular_function; [GO:0030674] protein-macromolecule adaptor activity; [GO:0005886] plasma membrane; [GO:00…		Branchio-Oculo-Facial Syndrome; Recurrent Glioma; Postinfarction; Cleft Lip with or without Cleft Palate; Van der Woude syndrome; Hyperkeratosis; Zika Virus Infection; Inflammatory dermatosis; Miscarriage; Nasal Polyps; Dermatitis; Adult Rhabdomyosarcoma; Childhood Rhabdomyosarcoma; Rhabdomyosarcoma; Aortic Aneurysm, Abdominal; Finding of Mean Corpuscular Hemoglobin; Stomach Neoplasms; mathematic…		AP2A1	0	0	0	0	0	0	0	0	0	0	0	0	0	0	0	0
165	AEBP1	0	1	0	0	0	0	0	0	0	1	2	5	0		AEBP1	AE binding protein 1	GO:1904026 regulation of collagen fibril organization;GO:1903053 regulation of extracellular matrix organization;GO:1902903 regulation of supramolecular fiber organization	GO:0062023 collagen-containing extracellular matrix;GO:0031012 extracellular matrix;GO:0030312 external encapsulating structure	GO:0005518 collagen binding;GO:0005201 extracellular matrix structural constituent;GO:0005516 calmodulin binding	This gene encodes a member of carboxypeptidase A protein family. The encoded protein may function as a transcriptional repressor and play a role in adipogenesis and smooth muscle cell differentiation. Studies in mice suggest that this gene functions in wound healing and abdominal wall development. Overexpression of this gene is associated with glioblastoma. [provided by RefSeq, May 2013]			Smooth muscle and vessel expression.; antibody: A majority of normal tissues displayed weak to moderate cytoplasmic immunoreactivity. Additional nuclear staining was observed in CNS. Glandular cells in stomach showed strong cytoplasmic positivity. Lymphoid tissues and squamous epithelia were negative.	Distribution: Detected in all; Specificity: Low tissue specificity	chr7:44104320-44114564	Predicted secreted proteins; Peptidases:Metallopeptidases; Human disease related genes:Congenital malformations:Congenital malformations of skin; Disease related genes; Potential drug targets; Enzymes; Predicted intracellular proteins	Vesicles (Supported); Additional: Cytosol;Nucleoplasm	[GO:0003674] molecular_function; [GO:0043167] ion binding; [GO:0008150] biological_process; [GO:0008233] peptidase activity; [GO:0005575] cellular_component; [GO:0005576] extracellular region; [GO:0005615] extracellular space; [GO:0005622] intracellular anatomical structure; [GO:0043226] organelle; [GO:0005634] nucleus; [GO:0005737] cytoplasm; [GO:0003677] DNA binding; [GO:0009058] biosynthetic p…	HP:0010810:Long uvula; HP:0031158:Widened atrophic scar; HP:0003994:Dislocated wrist; HP:0100546:Carotid artery stenosis; HP:0025509:Piezogenic pedal papules; HP:0002933:Ventral hernia; HP:0025232:Bursitis; HP:0006439:Radioulnar dislocation; HP:0002933:Ventral hernia; HP:0025232:Bursitis; HP:0007457:Prominent veins on trunk; HP:0008138:Equinus calcaneus; HP:0009938:Sunken cheeks; HP:0006243:Phala…	EHLERS-DANLOS SYNDROME, CLASSIC-LIKE, 2; Structural foot deformity; Squared iliac bones; Abdominal wall defect; Prominent superficial veins; Bursitis; Thin eyebrow; Ventral Hernia; Poor wound healing; Atrophic scar; Thoracic scoliosis; Umbilical hernia; Range of joint movement increased; Gastroschisis; Cellulitis; Prematurely aged appearance; Redundant skin; Bilateral ptosis; Hyperextensible skin…	DOID:0080732 Ehlers-Danlos syndrome classic-like 2	AEBP1	0	0	0	0	0	0	0	0	0	0	0	0	0	0	0	0
166	TLE5	0	1	1	0	0	1	0	1	1	1	6	23	0		TLE5	TLE family member 5, transcriptional modulator	GO:2000210 positive regulation of anoikis;GO:2000209 regulation of anoikis;GO:0060761 negative regulation of response to cytokine stimulus	GO:0005667 transcription regulator complex;GO:0032991 protein-containing complex;GO:0005634 nucleus	GO:0003714 transcription corepressor activity;GO:0003712 transcription coregulator activity;GO:0140110 transcription regulator activity	The protein encoded by this gene is similar in sequence to the amino terminus of Drosophila enhancer of split groucho, a protein involved in neurogenesis during embryonic development. The encoded protein, which belongs to the groucho/TLE family of proteins, can function as a homooligomer or as a heteroologimer with other family members to dominantly repress the expression of other family member g…				Distribution: Detected in all; Specificity: Low tissue specificity	chr19:3063107-3052910	Predicted intracellular proteins	Nucleoplasm (Supported)	[GO:0008150] biological_process; [GO:0009058] biosynthetic process; [GO:0034641] cellular nitrogen compound metabolic process; [GO:0005575] cellular_component; [GO:0005622] intracellular anatomical structure; [GO:0043226] organelle; [GO:0005634] nucleus; [GO:0003674] molecular_function; [GO:0007267] cell-cell signaling; [GO:0007165] signal transduction; [GO:0032991] protein-containing complex; [G…		Metallosis; Pulmonary Cystic Fibrosis; Apathy; Generalized Anxiety Disorder; Metastatic castration-resistant prostate cancer; Epileptic Seizures; Acute monocytic leukemia; Myocardial Ischemia; Cystic Fibrosis; Colonic Neoplasms; Polycystic Ovary Syndrome; Metabolic Syndrome X; Epilepsy; Depressed mood; Mental Depression; Depressive disorder; Parkinson Disease; Adenocarcinoma of lung (disorder); S…		TLE5	0	0	0	0	0	0	0	1	0	0	0	0	0	0	1	0
167	CRISP1	1	1	0	0	1	0	0	0	1	1	5	6	0		CRISP1	cysteine rich secretory protein 1	GO:0060046 regulation of acrosome reaction;GO:0007342 fusion of sperm to egg plasma membrane involved in single fertilization;GO:0045026 plasma membrane fusion	GO:0005615 extracellular space;GO:0005576 extracellular region;GO:0005634 nucleus	GO:0005246 calcium channel regulator activity;GO:0099106 ion channel regulator activity;GO:0016247 channel regulator activity	Fertilization consists of a sequence of specific cell-cell interactions culminating in the fusion of the sperm and egg plasma membranes. Recognition, binding, and fusion occur through the interaction of complementary molecules that are localized to specific domains of the sperm and egg plasma membranes. In the sperm, the postacrosomal region or equatorial segment is involved in sperm-egg plasma m…			antibody: Moderate cytoplasmic and membranous staining was observed in epididymis and seminal vesicle. All other tissues were negative.; Expression in sperms and glandular cells in epididymis.	Distribution: Detected in some; Specificity: Tissue enriched	chr6:49877096-49833939	Predicted secreted proteins		[GO:0005575] cellular_component; [GO:0005576] extracellular region; [GO:0005622] intracellular anatomical structure; [GO:0043226] organelle; [GO:0005634] nucleus; [GO:0005615] extracellular space; [GO:0008150] biological_process; [GO:0000003] reproduction; [GO:0061024] membrane organization; [GO:0007009] plasma membrane organization; [GO:0003674] molecular_function		Idiopathic chronic pancreatitis; Syphilis; Acute pancreatitis; Pancreatitis; Esophageal Neoplasms; Malignant neoplasm of esophagus; Esophageal carcinoma; Squamous cell carcinoma of esophagus; Malignant neoplasm of pancreas; Pancreatic carcinoma; Tumor Cell Invasion		CRISP1	0	0	0	0	0	0	0	0	0	0	0	0	0	0	0	0
173	AFM	1	0	0	0	0	0	0	0	0	0	1	1	0		AFM	afamin	GO:0071693 protein transport within extracellular region;GO:0051180 vitamin transport;GO:0035592 establishment of protein localization to extracellular region	GO:0072562 blood microparticle;GO:0070062 extracellular exosome;GO:1903561 extracellular vesicle	GO:0008431 vitamin E binding;GO:0005504 fatty acid binding;GO:0033293 monocarboxylic acid binding	This gene is a member of the albumin gene family, which is comprised of four genes that localize to chromosome 4 in a tandem arrangement. These four genes encode structurally-related serum transport proteins that are known to be evolutionarily related. The protein encoded by this gene is regulated developmentally, expressed in the liver and secreted into the bloodstream. [provided by RefSeq, Jul …	kidney;liver		Distinct plasma staining.; antibody: Plasma distinctly positive. Subset of cells in seminiferous ducts and uterine gland showed moderate to strong nuclear positivity. Leydig cells, neuronal cells in cerebral cortex, exocrine pancreas, stomach, alveolar macrophages and bronchus displayed weak to moderate cytoplasmic staining. Remaining normal tissues were negative.	Distribution: Detected in some; Specificity: Tissue enriched	chr4:73481745-73504001	Predicted secreted proteins		[GO:0005575] cellular_component; [GO:0005576] extracellular region; [GO:0005615] extracellular space; [GO:0008150] biological_process; [GO:0006810] transport; [GO:0015031] protein transport; [GO:0003674] molecular_function; [GO:0005622] intracellular anatomical structure; [GO:0005737] cytoplasm; [GO:0043226] organelle; [GO:0043167] ion binding; [GO:0008289] lipid binding		acute flaccid myelitis; FRAXE Syndrome; Eye Color; Hermaphroditism; Teratozoospermia; Esophageal Varices; Fulminant hepatitis; Herpesviridae Infections; Lichen Sclerosus et Atrophicus; Drug toxicity; Adverse reaction to drug; Decompression Sickness; Acute Kidney Insufficiency; Optic Atrophy 1; Fibrillation; Liver Cirrhosis, Alcoholic; Acute-On-Chronic Liver Failure; Hepatolenticular Degeneration;…		AFM	0	0	0	0	0	0	0	0	0	0	0	0	0	0	0	0
174	AFP	0	0	0	0	0	0	1	0	1	1	3	7	0		AFP	alpha fetoprotein	GO:0001542 ovulation from ovarian follicle;GO:0042448 progesterone metabolic process;GO:0030728 ovulation	GO:0005788 endoplasmic reticulum lumen;GO:0005783 endoplasmic reticulum;GO:0005615 extracellular space	GO:0005504 fatty acid binding;GO:0033293 monocarboxylic acid binding;GO:0031406 carboxylic acid binding	This gene encodes alpha-fetoprotein, a major plasma protein produced by the yolk sac and the liver during fetal life. Alpha-fetoprotein expression in adults is often associated with hepatocarcinoma and with teratoma, and has prognostic value for managing advanced gastric cancer. However, hereditary persistance of alpha-fetoprotein may also be found in individuals with no obvious pathology. The pr…	heart;liver;spleen	(hsa04390)Hippo signaling pathway	Plasma positivity in placenta.; antibody: Strong plasma positivity was observed in placenta. Cells in adrenal gland showed strong cytoplasmic/membranous positivity. A fraction of glandular cells of prostate displayed strong nuclear and extra cellular immunoreactivity. Other normal tissues were in general negative.	Distribution: Detected in single; Specificity: Tissue enriched	chr4:73436221-73456174	Predicted secreted proteins; Disease related genes; Cancer-related genes:Candidate cancer biomarkers	Golgi apparatus (Approved); Additional: Cytosol	[GO:0005575] cellular_component; [GO:0005576] extracellular region; [GO:0005615] extracellular space; [GO:0003674] molecular_function; [GO:0043167] ion binding; [GO:0005622] intracellular anatomical structure; [GO:0005737] cytoplasm; [GO:0043226] organelle; [GO:0005783] endoplasmic reticulum; [GO:0008289] lipid binding; [GO:0008150] biological_process; [GO:0000003] reproduction; [GO:0048856] anat…	HP:0045057:Decreased levels of alpha-fetoprotein; HP:0000007:Autosomal recessive inheritance	ALPHA-FETOPROTEIN, HEREDITARY PERSISTENCE OF; Acinar cell tumor; Cardiac cirrhosis; Congenital junctional epidermolysis bullosa-pyloric atresia syndrome; Decreased levels of alpha-fetoprotein; Graft ischaemia; Metastatic Malignant Germ Cell Tumor; Necrosis of placenta; Postsurgical Stage I Hepatoblastoma; Stage IS Testicular Cancer AJCC v6 and v7; Stage IS Testicular Cancer AJCC v8; Vasa Previa; …		AFP	0	0	0	0	0	0	0	0	0	0	0	0	0	0	0	1
176	ACAN	0	1	1	0	0	1	0	0	1	1	5	14	0		ACAN	aggrecan	GO:0001501 skeletal system development;GO:0007155 cell adhesion;GO:0022610 biological adhesion	GO:0043202 lysosomal lumen;GO:0005796 Golgi lumen;GO:0005775 vacuolar lumen	GO:0030021 extracellular matrix structural constituent conferring compression resistance;GO:0005540 hyaluronic acid binding;GO:0005201 extracellular matrix structural constituent	This gene is a member of the aggrecan/versican proteoglycan family. The encoded protein is an integral part of the extracellular matrix in cartilagenous tissue and it withstands compression in cartilage. Mutations in this gene may be involved in skeletal dysplasia and spinal degeneration. Multiple alternatively spliced transcript variants that encode different protein isoforms have been observed …	bone		High expression in chondrocytes.; antibody: Strong expression was observed in chondrocytes while fractions of hepatocytes displayed moderate cytoplasmic positivity. Remaining normal tissues were generally negative.	Distribution: Detected in some; Specificity: Tissue enhanced	chr15:88803436-88875353	Predicted secreted proteins; Human disease related genes:Congenital malformations:Congenital malformations of the musculoskeletal system; Human disease related genes:Musculoskeletal diseases:Skeletal diseases; Disease related genes; Predicted intracellular proteins		[GO:0003674] molecular_function; [GO:0043167] ion binding; [GO:0008150] biological_process; [GO:0007155] cell adhesion; [GO:0005575] cellular_component; [GO:0005576] extracellular region; [GO:0009058] biosynthetic process; [GO:0009056] catabolic process; [GO:0005622] intracellular anatomical structure; [GO:0005737] cytoplasm; [GO:0043226] organelle; [GO:0005773] vacuole; [GO:0005764] lysosome; [G…	HP:0005285:Absent nasal bridge; HP:0005285:Absent nasal bridge; HP:0010886:Osteochondritis Dissecans; HP:0002795:Abnormal respiratory system physiology; HP:0025428:Bronchospasm; HP:0003370:Flat capital femoral epiphysis; HP:0100777:Exostoses; HP:0002651:Spondyloepimetaphyseal dysplasia; HP:0010582:Irregular epiphyses; HP:0008843:Hip osteoarthritis; HP:0002655:Spondyloepiphyseal dysplasia; HP:0002…	PEROXISOME BIOGENESIS DISORDER, COMPLEMENTATION GROUP F; Spondyloepimetaphyseal Dysplasia, Aggrecan Type; Spondyloepiphyseal Dysplasia, Kimberley Type; Absent nasal bridge; Hypomyelination, Global Cerebral; Aortic dissection rupture; Dilation of the thoracic aorta; Low Back Pain, Mechanical; Abnormal breathing; Familial Osteochondritis Dissecans; Osteoarthritis of ankle; Collagenopathy, type 2 al…	DOID:84 osteochondritis dissecans;DOID:0112282 spondyloepiphyseal dysplasia Kimberley type	ACAN	0	0	0	0	0	0	0	0	0	0	0	0	0	0	0	0
177	AGER	0	1	0	0	0	0	0	0	1	0	2	2	0		AGER	advanced glycosylation end-product specific receptor	GO:1904470 regulation of endothelin production;GO:1904472 positive regulation of endothelin production;GO:0009757 hexose mediated signaling	GO:0001650 fibrillar center;GO:0016324 apical plasma membrane;GO:0045177 apical part of cell	GO:0050785 advanced glycation end-product receptor activity;GO:0044548 S100 protein binding;GO:0005044 scavenger receptor activity	The advanced glycosylation end product (AGE) receptor encoded by this gene is a member of the immunoglobulin superfamily of cell surface receptors. It is a multiligand receptor, and besides AGE, interacts with other molecules implicated in homeostasis, development, and inflammation, and certain diseases, such as diabetes and Alzheimer's disease. Many alternatively spliced transcript variants enco…	lung	(hsa04933)AGE-RAGE signaling pathway in diabetic complications; (hsa04613)Neutrophil extracellular trap formation; (hsa05415)Diabetic cardiomyopathy	antibody: Normal cells generally showed moderate cytoplasmic positivity. The lung displayed strong membranous positivity in combination with cytoplasmic immunoreactivity whereas glandular cells in breast and hematopoietic cells showed strong nuclear and cytoplasmic positivity.; Membranous expression in pneumocytes. Weak expression in endothelial cells.	Distribution: Detected in many; Specificity: Tissue enriched	chr6:32184380-32180969	Transporters:Accessory Factors Involved in Transport; Predicted secreted proteins; Cancer-related genes:Candidate cancer biomarkers	Cell Junctions;Plasma membrane (Approved); Additional: Nucleoli fibrillar center	[GO:0005575] cellular_component; [GO:0005576] extracellular region; [GO:0005886] plasma membrane; [GO:0005622] intracellular anatomical structure; [GO:0043226] organelle; [GO:0005634] nucleus; [GO:0005730] nucleolus; [GO:0003674] molecular_function; [GO:0008150] biological_process; [GO:0006950] response to stress; [GO:0006810] transport; [GO:0016192] vesicle-mediated transport; [GO:0009058] biosy…		Bacteremia caused by Gram-negative bacteria; Reactive perforating collagenosis; Bacterial oral infection; Chronic obstructive asthma (with obstructive pulmonary disease); Encapsulating Peritoneal Sclerosis; Leptomeningeal enhancement; Age-related amyloidosis; Chemical-induced asthma; Staphylococcus Aureus Pneumonia; Central post-stroke pain; Staphylococcal Skin Infections; Paucigranulocytic asthm…		AGER	0	0	0	0	0	0	0	0	0	0	0	0	0	0	0	0
181	AGRP	0	0	0	0	0	0	0	0	1	0	1	1	0		AGRP	agouti related neuropeptide	GO:0048571 long-day photoperiodism;GO:0008343 adult feeding behavior;GO:2000253 positive regulation of feeding behavior	GO:0005796 Golgi lumen;GO:0043025 neuronal cell body;GO:0044297 cell body	GO:0070996 type 1 melanocortin receptor binding;GO:0031779 melanocortin receptor binding;GO:0005184 neuropeptide hormone activity	This gene encodes an antagonist of the melanocortin-3 and melanocortin-4 receptor. It appears to regulate hypothalamic control of feeding behavior via melanocortin receptor and/or intracellular calcium regulation, and thus plays a role in weight homeostasis. Mutations in this gene have been associated with late on-set obesity. [provided by RefSeq, Dec 2009]		(hsa04920)Adipocytokine signaling pathway	antibody: Strong cytoplasmic positivity was observed in epididymis and strong staining of synapses and neuronal projections in hypothalamus. A few tissues displayed weak to moderate membranous or cytoplasmic staining in a fraction of cells, including adrenal gland and breast.; Cytoplasmic expression in fractions of cells in epididymis and adrenal medulla. Distinct positivity in synapses and proje…	Distribution: Detected in some; Specificity: Group enriched	chr16:67483547-67482571	Predicted secreted proteins; Human disease related genes:Endocrine and metabolic diseases:Other endocrine and metabolic diseases; Human disease related genes:Other diseases:Mental and behavioural disorders; Disease related genes		[GO:0005575] cellular_component; [GO:0005576] extracellular region; [GO:0003674] molecular_function; [GO:0008150] biological_process; [GO:0007165] signal transduction; [GO:0005622] intracellular anatomical structure; [GO:0005737] cytoplasm; [GO:0043226] organelle; [GO:0005794] Golgi apparatus; [GO:0005615] extracellular space; [GO:0000003] reproduction	HP:0012340:Decreased resting energy expenditure; HP:0010982:Polygenic inheritance; HP:0031819:Increased waist to hip ratio; HP:0001513:Obesity; HP:0000006:Autosomal dominant inheritance; HP:0000007:Autosomal recessive inheritance	OBESITY, LATE-ONSET; Thinness; Rhizarthrosis; Vanishing twin syndrome; Combat Disorders; Early syphilis, unspecified; Food hoarding; AIDS defining illness; Pediatric human immunodeficiency virus infection; Distorted body image; Spondylometaphyseal dysplasia, Sedaghatian type; Perinatal HIV infection; Gonadotropin-Resistant Ovary Syndrome; Recidivism; HBV coinfection; Increased waist to hip ratio;…	DOID:9970 obesity	AGRP	0	0	0	0	0	0	0	0	0	0	0	0	0	0	0	0
185	AGTR1	0	1	1	0	0	0	0	0	1	1	4	4	1	WP4799,WP5076,WP4883,WP5038,hsa05171	AGTR1	angiotensin II receptor type 1	GO:0086097 phospholipase C-activating angiotensin-activated signaling pathway;GO:0002018 renin-angiotensin regulation of aldosterone production;GO:0002034 maintenance of blood vessel diameter homeostasis by renin-angiotensin	GO:0005887 integral component of plasma membrane;GO:0031226 intrinsic component of plasma membrane;GO:0016021 integral component of membrane	GO:0001596 angiotensin type I receptor activity;GO:0031711 bradykinin receptor binding;GO:0001595 angiotensin receptor activity	Angiotensin II is a potent vasopressor hormone and a primary regulator of aldosterone secretion. It is an important effector controlling blood pressure and volume in the cardiovascular system. It acts through at least two types of receptors. This gene encodes the type 1 receptor which is thought to mediate the major cardiovascular effects of angiotensin II. This gene may play a role in the genera…	liver;placenta	(hsa04614)Renin-angiotensin system; (hsa04927)Cortisol synthesis and secretion; (hsa04924)Renin secretion	antibody: Strong positivity was observed in adipocytes together with endothelial cells in most tissues. Remaining normal cells were negative. ; Cytoplasmic expression in adipocytes and endothelial cells.	Distribution: Detected in many; Specificity: Tissue enhanced	chr3:148697903-148743003	Transporters; FDA approved drug targets:Small molecule drugs; Human disease related genes:Congenital malformations:Congenital malformations of the urinary system; Disease related genes; G-protein coupled receptors:GPCRs excl olfactory receptors	Vesicles (Uncertain)	[GO:0008150] biological_process; [GO:0007165] signal transduction; [GO:0005575] cellular_component; [GO:0003674] molecular_function; [GO:0003013] circulatory system process; [GO:0005886] plasma membrane; [GO:0006950] response to stress; [GO:0044403] biological process involved in symbiotic interaction; [GO:0042592] homeostatic process; [GO:0040011] locomotion; [GO:0048870] cell motility; [GO:0030…	HP:0008660:Renotubular dysgenesis; HP:0004972:Elevated mean arterial pressure; HP:0002009:Potter facies; HP:0000079:Abnormality of the urinary system; HP:0004421:Elevated systolic blood pressure; HP:0005117:Elevated diastolic blood pressure; HP:0100519:Anuria; HP:0004492:Widely patent fontanelles and sutures; HP:0001426:Multifactorial inheritance; HP:0002615:Hypotension; HP:0002089:Pulmonary hypo…	Adrenal Rest Tumor; Reflex bradycardia; Capillaritis; Renal Tubular Dysgenesis With Choanal Atresia And Athelia; Uremic encephalopathy; Coronary artery atheroma; Juxtaglomerular tumor; Patent Ductus Arteriosus Familial; Persistent pulmonary hypertension; angina symptom; Allanson Pantzar McLeod syndrome; Glomerulitis (disorder); Hyperphosphatasemia with bone disease; Megaureter; Symptomatic caroti…	DOID:10825 essential hypertension	AGTR1	0	0	0	0	0	0	0	0	0	0	0	0	0	0	0	0
186	AGTR2	1	0	0	0	0	1	0	0	0	0	2	2	1	WP4799,WP5038	AGTR2	angiotensin II receptor type 2	GO:0002033 angiotensin-mediated vasodilation involved in regulation of systemic arterial blood pressure;GO:0007199 G protein-coupled receptor signaling pathway coupled to cGMP nucleotide second messenger;GO:0035566 regulation of metanephros size	GO:0005887 integral component of plasma membrane;GO:0031226 intrinsic component of plasma membrane;GO:0016021 integral component of membrane	GO:0001595 angiotensin receptor activity;GO:0004945 angiotensin type II receptor activity;GO:0048019 receptor antagonist activity	The protein encoded by this gene belongs to the G-protein coupled receptor 1 family, and functions as a receptor for angiotensin II. It is an intergral membrane protein that is highly expressed in fetus and in neonates, but scantily in adult tissues, except brain, adrenal medulla, and atretic ovary. This receptor has been shown to mediate programmed cell death and this apoptotic function may play…		(hsa04614)Renin-angiotensin system; (hsa04261)Adrenergic signaling in cardiomyocytes; (hsa04080)Neuroactive ligand-receptor interaction		Distribution: Detected in some; Specificity: Tissue enhanced	chrX:116170744-116174974	G-protein coupled receptors:GPCRs excl olfactory receptors		[GO:0008150] biological_process; [GO:0007165] signal transduction; [GO:0005575] cellular_component; [GO:0003674] molecular_function; [GO:0006950] response to stress; [GO:0008219] cell death; [GO:0003013] circulatory system process; [GO:0005886] plasma membrane; [GO:0040007] growth; [GO:0009058] biosynthetic process; [GO:0034641] cellular nitrogen compound metabolic process; [GO:0040011] locomotio…	HP:0005824:Clinodactyly of the 2nd toe; HP:0008504:Moderate sensorineural hearing impairment; HP:0008587:Mild neurosensory hearing impairment; HP:0006118:Shortening of all distal phalanges of the fingers; HP:0002245:Meckel diverticulum; HP:0000629:Periorbital fullness; HP:0012704:Widened subarachnoid space; HP:0000637:Long palpebral fissure; HP:0004691:2-3 toe syndactyly; HP:0002307:Drooling; HP:…	Ureterovesical junction obstruction; MENTAL RETARDATION, X-LINKED 88 (disorder); Distributive shock; Familial vesicoureteral reflux; Megaureter; Mesial temporal sclerosis; Segmental glomerulosclerosis; Mental Retardation, X-Linked Nonsyndromic; Postherpetic neuralgia; Clinodactyly of the 2nd toe; Aneurysm of ascending aorta; Moderate sensorineural hearing impairment; Mild neurosensory hearing imp…		AGTR2	0	0	0	0	0	0	0	0	0	0	0	0	0	0	0	0
190	NR0B1	0	0	0	0	0	0	0	1	0	0	1	1	0		NR0B1	nuclear receptor subfamily 0 group B member 1	GO:0033327 Leydig cell differentiation;GO:0030238 male sex determination;GO:0060008 Sertoli cell differentiation	GO:0042788 polysomal ribosome;GO:0005844 polysome;GO:0034451 centriolar satellite	GO:0032448 DNA hairpin binding;GO:0000217 DNA secondary structure binding;GO:0016922 nuclear receptor binding	This gene encodes a protein that contains a DNA-binding domain. The encoded protein acts as a dominant-negative regulator of transcription which is mediated by the retinoic acid receptor. This protein also functions as an anti-testis gene by acting antagonistically to Sry. Mutations in this gene result in both X-linked congenital adrenal hypoplasia and hypogonadotropic hypogonadism. [provided by …	lung	(hsa04927)Cortisol synthesis and secretion		Distribution: Detected in some; Specificity: Group enriched	chrX:30309390-30304206	Human disease related genes:Reproductive system diseases:Reproductive system diseases; Cancer-related genes:Candidate cancer biomarkers; Transcription factors:Zinc-coordinating DNA-binding domains; Human disease related genes:Endocrine and metabolic diseases:Adrenal gland diseases; Disease related genes; Nuclear receptors; Predicted intracellular proteins	Nuclear speckles (Supported); Additional: Centriolar satellite;Vesicles	[GO:0005575] cellular_component; [GO:0005622] intracellular anatomical structure; [GO:0043226] organelle; [GO:0005634] nucleus; [GO:0005737] cytoplasm; [GO:0005654] nucleoplasm; [GO:0008150] biological_process; [GO:0009058] biosynthetic process; [GO:0034641] cellular nitrogen compound metabolic process; [GO:0003674] molecular_function; [GO:0005856] cytoskeleton; [GO:0005815] microtubule organizin…	HP:0000030:Testicular gonadoblastoma; HP:0000058:Abnormal labia morphology; HP:0012870:Vanishing testis; HP:0000045:Abnormality of the scrotum; HP:0008715:Testicular dysgenesis; HP:0000149:Ovarian gonadoblastoma; HP:0012244:Abnormal sex determination; HP:0008726:Hypoplasia of the vagina; HP:0012245:Sex reversal; HP:0008730:Female external genitalia in individual with 46,XY karyotype; HP:0004319:D…	Xp21 Contiguous Gene Deletion Syndrome; Hypoadrenocorticism, familial; Complex Glycerol Kinase Deficiency; Deficiency of glycerol kinase; Addisonian crisis; Constitutional delay of puberty; KERATOSIS FOLLICULARIS SPINULOSA DECALVANS, AUTOSOMAL DOMINANT (disorder); Primary spermatogenic failure; Peripheral precocious puberty; Intrauterine Growth Retardation, Metaphyseal Dysplasia, Adrenal Hypoplas…	DOID:0111777 46,XY sex reversal 2;DOID:0080156 X-linked adrenal hypoplasia congenita	NR0B1	0	0	0	0	0	0	0	0	0	0	0	0	0	0	0	0
191	AHCY	0	0	0	0	0	1	0	0	0	0	1	1	0		AHCY	adenosylhomocysteinase	GO:0033353 S-adenosylmethionine cycle;GO:0046500 S-adenosylmethionine metabolic process;GO:0006730 one-carbon metabolic process	GO:0042470 melanosome;GO:0048770 pigment granule;GO:0070062 extracellular exosome	GO:0004013 adenosylhomocysteinase activity;GO:0016802 trialkylsulfonium hydrolase activity;GO:0016801 hydrolase activity, acting on ether bonds	S-adenosylhomocysteine hydrolase belongs to the adenosylhomocysteinase family. It catalyzes the reversible hydrolysis of S-adenosylhomocysteine (AdoHcy) to adenosine (Ado) and L-homocysteine (Hcy). Thus, it regulates the intracellular S-adenosylhomocysteine (SAH) concentration thought to be important for transmethylation reactions. Deficiency in this protein is one of the different causes of hype…		(hsa00270)Cysteine and methionine metabolism; (hsa01100)Metabolic pathways	antibody: Most normal tissues showed moderate cytoplasmic and nuclear positivity. Thyroid, adrenal cortex, urothelium, renal tubules, fallopian tube, placental trophoblastic cells, cells in seminiferus ducts and breast were strongly stained.; Ubiquitous nuclear and cytoplasmic expression.	Distribution: Detected in all; Specificity: Low tissue specificity	chr20:34311976-34235012	ENZYME proteins:Hydrolases; Human disease related genes:Congenital disorders of metabolism:Congenital disorders of amino acid metabolism; Disease related genes; Potential drug targets; Enzymes; Predicted intracellular proteins	Cytosol (Supported)	[GO:0003674] molecular_function; [GO:0005575] cellular_component; [GO:0005622] intracellular anatomical structure; [GO:0005737] cytoplasm; [GO:0005829] cytosol; [GO:0008150] biological_process; [GO:0044281] small molecule metabolic process; [GO:0031410] cytoplasmic vesicle; [GO:0043226] organelle; [GO:0005576] extracellular region; [GO:0005615] extracellular space; [GO:0006790] sulfur compound me…	HP:0011996:Elevated coagulation factor V activity; HP:0008169:Reduced factor VII activity; HP:0003235:Hypermethioninemia; HP:0003235:Hypermethioninemia; HP:0010719:Abnormality of hair texture; HP:0002160:Hyperhomocystinemia; HP:0001976:Reduced antithrombin III activity; HP:0030890:Hyperintensity of cerebral white matter on MRI; HP:0008151:Prolonged prothrombin time; HP:0011900:Hypofibrinogenemia;…	Elevated coagulation factor V activity; Psychomotor retardation due to S-adenosylhomocysteine hydrolase deficiency; Hypermethioninemia due to deficiency of glycine N-methyltransferase; S-adenosylhomocysteine hydrolase deficiency; Reduced factor VII activity; Congenital disorder of glycosylation type 1A; Hyperhomocystinemia; Vitamin B 6 Deficiency; Amino Acid Metabolism, Inherited Disorders; Abnor…	DOID:0111039 hypermethioninemia with deficiency of S-adenosylhomocysteine hydrolase	AHCY	0	0	0	0	0	0	0	0	0	0	0	0	0	0	0	0
196	AHR	0	0	1	0	0	1	0	0	0	0	2	2	1	WP5115	AHR	aryl hydrocarbon receptor	GO:0002841 negative regulation of T cell mediated immune response to tumor cell;GO:1904613 cellular response to 2,3,7,8-tetrachlorodibenzodioxine;GO:1904612 response to 2,3,7,8-tetrachlorodibenzodioxine	GO:0034752 cytosolic aryl hydrocarbon receptor complex;GO:0034751 aryl hydrocarbon receptor complex;GO:0005667 transcription regulator complex	GO:0001094 TFIID-class transcription factor complex binding;GO:0001091 RNA polymerase II general transcription initiation factor binding;GO:0017025 TBP-class protein binding	The protein encoded by this gene is a ligand-activated helix-loop-helix transcription factor involved in the regulation of biological responses to planar aromatic hydrocarbons. This receptor has been shown to regulate xenobiotic-metabolizing enzymes such as cytochrome P450. Before ligand binding, the encoded protein is sequestered in the cytoplasm; upon ligand binding, this protein moves to the n…		(hsa04659)Th17 cell differentiation; (hsa04934)Cushing syndrome; (hsa05207)Chemical carcinogenesis - receptor activation	antibody: A majority of normal cells showed weak to moderate cytoplasmic staining. Strong staining was observer in kidney, fallopian tube, glandular cells in endometrium and epididymis. Salivary gland and hepatocytes were generally negative.; Ubiquitous nuclear and cytoplasmic expression.	Distribution: Detected in all; Specificity: Low tissue specificity	chr7:17298652-17346147	Cancer-related genes:Candidate cancer biomarkers; Human disease related genes:Nervous system diseases:Eye disease; Transcription factors:Basic domains; Disease related genes; Predicted intracellular proteins	Cytosol (Supported); Additional: Nucleoplasm	[GO:0008150] biological_process; [GO:0009058] biosynthetic process; [GO:0034641] cellular nitrogen compound metabolic process; [GO:0003674] molecular_function; [GO:0003700] DNA-binding transcription factor activity; [GO:0005575] cellular_component; [GO:0032991] protein-containing complex; [GO:0005622] intracellular anatomical structure; [GO:0043226] organelle; [GO:0005634] nucleus; [GO:0005737] c…	HP:0007675:Progressive night blindness; HP:0007675:Progressive night blindness; HP:0008046:Abnormal retinal vascular morphology; HP:0000987:Atypical scarring of skin; HP:0000035:Abnormal testis morphology; HP:0000563:Keratoconus; HP:0000842:Hyperinsulinemia; HP:0000512:Abnormal electroretinogram; HP:0005978:Type II diabetes mellitus; HP:0007663:Reduced visual acuity; HP:0000602:Ophthalmoplegia; H…	Chronic nonspecific lung disease; Pancreatic cancer, adult; Severe dry skin; Infantile nystagmus; Chronobiology Disorders; Malignant neoplasm of ureter; Psychogenic Inversion of Circadian Rhythm; Chronic eczema; Coccidiosis; Enteric coccidiosis; Ureteral Neoplasms; Uroporphyrinuria; Infections of musculoskeletal system; Polyomavirus-associated nephropathy; Splenic Diseases; Chronic respiratory di…	DOID:0112142 retinitis pigmentosa 85	AHR	0	0	0	0	0	0	0	0	0	0	0	0	0	0	0	0
197	AHSG	0	0	1	0	0	0	1	1	1	1	5	8	0		AHSG	alpha 2-HS glycoprotein	GO:0006907 pinocytosis;GO:0030502 negative regulation of bone mineralization;GO:0070168 negative regulation of biomineral tissue development	GO:0031093 platelet alpha granule lumen;GO:0031091 platelet alpha granule;GO:0072562 blood microparticle	GO:0004869 cysteine-type endopeptidase inhibitor activity;GO:0019210 kinase inhibitor activity;GO:0004866 endopeptidase inhibitor activity	The protein encoded by this gene is a negatively-charged serum glycoprotein that is synthesized by hepatocytes. The encoded protein consists of two polypeptide chains, which are both cleaved from a proprotein encoded from a single mRNA. It is involved in several processes, including endocytosis, brain development, and the formation of bone tissue. Defects in this gene are a cause of susceptibilit…	liver		antibody: Serum showed strong positivity.; Distinct positivity in plasma.	Distribution: Detected in some; Specificity: Tissue enriched	chr3:186613060-186621318	Human disease related genes:Congenital malformations:Other congenital malformations; Predicted secreted proteins; Disease related genes; Cancer-related genes:Candidate cancer biomarkers	Golgi apparatus (Enhanced)	[GO:0003674] molecular_function; [GO:0030234] enzyme regulator activity; [GO:0005575] cellular_component; [GO:0005576] extracellular region; [GO:0005615] extracellular space; [GO:0005622] intracellular anatomical structure; [GO:0005737] cytoplasm; [GO:0043226] organelle; [GO:0005794] Golgi apparatus; [GO:0008150] biological_process; [GO:0006950] response to stress; [GO:0031012] extracellular matr…	HP:0200012:Short corpus callosum; HP:0002289:Alopecia universalis; HP:0005105:Abnormal nasal morphology; HP:0006887:Intellectual disability, progressive; HP:0100840:Aplasia/Hypoplasia of the eyebrow; HP:0002231:Sparse body hair; HP:0000815:Hypergonadotropic hypogonadism; HP:0001171:Split hand; HP:0002209:Sparse scalp hair; HP:0008064:Ichthyosis; HP:0001596:Alopecia; HP:0002353:EEG abnormality; HP…	Alopecia-Mental Retardation Syndrome 1; Mixed irritable bowel syndrome; AMR Syndrome; Epiphyses, Slipped; Perniola Krajewska Carnevale syndrome; Short corpus callosum; Cortical Congenital Hyperostosis; Sialolithiasis; Arteriovenous graft; Bluetongue infection; Rhinoconjunctivitis; Allergy to grass pollen; Alopecia universalis; Obesity, Metabolically Benign; Alpers Syndrome (disorder); Dysglycemia…	DOID:0080628 alopecia-mental retardation syndrome 1	AHSG	0	0	0	0	0	0	0	0	0	0	0	0	0	0	0	0
203	AK1	0	1	0	0	0	0	0	0	0	0	1	1	0		AK1	adenylate kinase 1	GO:0006172 ADP biosynthetic process;GO:0009180 purine ribonucleoside diphosphate biosynthetic process;GO:0009136 purine nucleoside diphosphate biosynthetic process	GO:0001520 outer dense fiber;GO:0036126 sperm flagellum;GO:0097729 9+2 motile cilium	GO:0004017 adenylate kinase activity;GO:0004550 nucleoside diphosphate kinase activity;GO:0050145 nucleoside monophosphate kinase activity	This gene encodes an adenylate kinase enzyme involved in energy metabolism and homeostasis of cellular adenine nucleotide ratios in different intracellular compartments. This gene is highly expressed in skeletal muscle, brain and erythrocytes. Certain mutations in this gene resulting in a functionally inadequate enzyme are associated with a rare genetic disorder causing nonspherocytic hemolytic a…	muscle	(hsa00730)Thiamine metabolism; (hsa00230)Purine metabolism; (hsa01240)Biosynthesis of cofactors	antibody: Moderate to strong cytoplasmic and nuclear positivity in a majority of normal tissues.; Cytoplasmic expression at variable levels in several different cell types, most abundant in skeletal muscle, fallopian tube and Leydig cells.	Distribution: Detected in all; Specificity: Tissue enhanced	chr9:127885542-127866480	Human disease related genes:Cardiovascular diseases:Hematologic diseases; Disease related genes; Potential drug targets; Enzymes; Predicted intracellular proteins; ENZYME proteins:Transferases	Cytosol (Supported)	[GO:0003674] molecular_function; [GO:0043167] ion binding; [GO:0005575] cellular_component; [GO:0005622] intracellular anatomical structure; [GO:0005737] cytoplasm; [GO:0016301] kinase activity; [GO:0008150] biological_process; [GO:0034641] cellular nitrogen compound metabolic process; [GO:0044281] small molecule metabolic process; [GO:0009058] biosynthetic process; [GO:0005829] cytosol; [GO:0043…	HP:0001878:Hemolytic anemia; HP:0000007:Autosomal recessive inheritance	Adenylate Kinase Deficiency, Hemolytic Anemia Due To; Deficiency of adenylate kinase; Red cell adenylate kinase deficiency; Herpes simplex type 1 infection; Lymphoma, Lymphocytic, Intermediate; Chronic hemolytic anemia; Schistosomiasis japonica; Nail-Patella Syndrome; Actinic keratosis; Infarction, Middle Cerebral Artery; Anemia, Hemolytic; Sarcopenia; Malignant lymphoma, lymphocytic, intermediat…	DOID:583 hemolytic anemia	AK1	0	0	0	0	0	0	0	0	0	0	0	0	0	0	0	0
207	AKT1	1	1	1	0	1	0	0	1	1	1	7	18	1	WP5098,WP5115	AKT1	AKT serine/threonine kinase 1	GO:0100002 negative regulation of protein kinase activity by protein phosphorylation;GO:1990418 response to insulin-like growth factor stimulus;GO:0010748 negative regulation of long-chain fatty acid import across plasma membrane	GO:0031234 extrinsic component of cytoplasmic side of plasma membrane;GO:0036064 ciliary basal body;GO:0009898 cytoplasmic side of plasma membrane	GO:0099103 channel activator activity;GO:0099104 potassium channel activator activity;GO:0030235 nitric-oxide synthase regulator activity	This gene encodes one of the three members of the human AKT serine-threonine protein kinase family which are often referred to as protein kinase B alpha, beta, and gamma. These highly similar AKT proteins all have an N-terminal pleckstrin homology domain, a serine/threonine-specific kinase domain and a C-terminal regulatory domain. These proteins are phosphorylated by phosphoinositide 3-kinase (P…		(hsa04973)Carbohydrate digestion and absorption; (hsa04923)Regulation of lipolysis in adipocytes; (hsa05213)Endometrial cancer	antibody: Most normal cells showed moderate to strong nuclear positivity.; Ubiquitous nuclear expression.	Distribution: Detected in all; Specificity: Low tissue specificity	chr14:104795748-104769349	Cancer-related genes:Mutated cancer genes; Human disease related genes:Other diseases:Mental and behavioural disorders; Cancer-related genes:Candidate cancer biomarkers; Human disease related genes:Cancers:Cancers of eye, brain, and central nervous system; Transporters:Accessory Factors Involved in Transport; Cancer-related genes:Mutational cancer driver genes; Human disease related genes:Congeni…	Nucleoplasm (Supported); Additional: Microtubules	[GO:0003674] molecular_function; [GO:0043167] ion binding; [GO:0008150] biological_process; [GO:0006464] cellular protein modification process; [GO:0016301] kinase activity; [GO:0007165] signal transduction; [GO:0005575] cellular_component; [GO:0005622] intracellular anatomical structure; [GO:0043226] organelle; [GO:0005634] nucleus; [GO:0005737] cytoplasm; [GO:0032991] protein-containing complex…	HP:0004472:Mandibular hyperostosis; HP:0007403:Hypertrophy of skin of soles; HP:0100521:Neoplasm of the thymus; HP:0004418:Thrombophlebitis; HP:0012871:Varicocele; HP:0007483:Depigmentation/hyperpigmentation of skin; HP:0005465:Facial hyperostosis; HP:0100730:Bronchogenic cyst; HP:0007818:Central heterochromia; HP:0010816:Epidermal nevus; HP:0010816:Epidermal nevus; HP:0010516:Thymus hyperplasia;…	COWDEN SYNDROME 6; Collagen nevus of skin; Dental cyst; Hypertrophy of skin of soles; Mandibular hyperostosis; Central odontogenic fibroma; Glandular papilloma; Infected cyst; Roux-en-y Anastomosis Site; SCHIZOPHRENIA 8 (disorder); Sialadenoma papilliferum; Depigmentation/hyperpigmentation of skin; Feline Lymphoma; Gynandroblastoma; Intraductal papilloma of breast; Salivary Gland Epithelial Myoep…	DOID:1612 breast cancer;DOID:9256 colorectal cancer;DOID:0081002 Cowden syndrome 6;DOID:2394 ovarian cancer;DOID:13482 Proteus syndrome	AKT1	1	0	0	0	0	0	0	0	0	0	0	1	0	0	0	0
210	ALAD	0	0	0	0	0	1	0	0	0	0	1	1	0		ALAD	aminolevulinate dehydratase	GO:0010266 response to vitamin B1;GO:0070541 response to platinum ion;GO:0010044 response to aluminum ion	GO:1904813 ficolin-1-rich granule lumen;GO:0101002 ficolin-1-rich granule;GO:0034774 secretory granule lumen	GO:0004655 porphobilinogen synthase activity;GO:1904854 proteasome core complex binding;GO:0016836 hydro-lyase activity	The ALAD enzyme is composed of 8 identical subunits and catalyzes the condensation of 2 molecules of delta-aminolevulinate to form porphobilinogen (a precursor of heme, cytochromes and other hemoproteins). ALAD catalyzes the second step in the porphyrin and heme biosynthetic pathway; zinc is essential for enzymatic activity. ALAD enzymatic activity is inhibited by lead and a defect in the ALAD st…		(hsa00860)Porphyrin metabolism; (hsa01240)Biosynthesis of cofactors; (hsa01100)Metabolic pathways	antibody: Most normal tissues were weakly stained or negative. Adrenal gland, tubular cells of kidney, stomach and salivary gland showed strong cytoplasmic and occasional nuclear immunoreactivity.; Cytoplasmic expression in most normal cells. Distinct expression in gastric mucosa, renal tubules, leydig cells, salivary and adrenal glands.	Distribution: Detected in all; Specificity: Tissue enhanced	chr9:113401301-113386312	FDA approved drug targets:Small molecule drugs; ENZYME proteins:Lyases; Disease related genes; Human disease related genes:Congenital disorders of metabolism:Congenital disorders of cofactor/vitamin metabolism; Enzymes; Predicted intracellular proteins	Cytosol (Approved)	[GO:0003674] molecular_function; [GO:0043167] ion binding; [GO:0008150] biological_process; [GO:0009058] biosynthetic process; [GO:0034641] cellular nitrogen compound metabolic process; [GO:0016829] lyase activity; [GO:0005575] cellular_component; [GO:0005622] intracellular anatomical structure; [GO:0043226] organelle; [GO:0005634] nucleus; [GO:0005576] extracellular region; [GO:0005737] cytoplas…	HP:0033010:Increased fecal coproporphyrin 3; HP:0040322:Purple urine; HP:0011848:Abdominal colic; HP:0012187:Increased erythrocyte protoporphyrin concentration; HP:0005946:Ventilator dependence with inability to wean; HP:0003163:Elevated urinary delta-aminolevulinic acid; HP:0012217:Increased urinary porphobilinogen; HP:0030272:Abnormal erythrocyte enzyme level; HP:0031258:Delirium; HP:0002203:Re…	LEAD POISONING, SUSCEPTIBILITY TO; PORPHYRIA, ACUTE HEPATIC, DIGENIC; Abdominal colic; Lead Poisoning, Nervous System; Elevated urinary delta-aminolevulinic acid; Porphobilinogen synthase deficiency; Porphyrias, Hepatic; Lead Poisoning; Angioblastic Meningioma; Cerebral Convexity Meningioma; Hemangioblastic Meningioma; Hemangiopericytic Meningioma; Intraorbital Meningioma; Microcystic meningioma;…	DOID:3133 acute porphyria	ALAD	0	0	0	0	0	0	0	0	0	0	0	0	0	0	0	0
212	ALAS2	1	0	0	0	0	0	0	0	0	1	2	2	0		ALAS2	5'-aminolevulinate synthase 2	GO:0042541 hemoglobin biosynthetic process;GO:0032364 oxygen homeostasis;GO:0006782 protoporphyrinogen IX biosynthetic process	GO:0005759 mitochondrial matrix;GO:0005743 mitochondrial inner membrane;GO:0019866 organelle inner membrane	GO:0003870 5-aminolevulinate synthase activity;GO:0016749 N-succinyltransferase activity;GO:0016748 succinyltransferase activity	The product of this gene specifies an erythroid-specific mitochondrially located enzyme. The encoded protein catalyzes the first step in the heme biosynthetic pathway. Defects in this gene cause X-linked pyridoxine-responsive sideroblastic anemia. Alternatively spliced transcript variants encoding different isoforms have been identified. [provided by RefSeq, Jul 2008]	blood;liver;spleen	(hsa00260)Glycine, serine and threonine metabolism; (hsa00860)Porphyrin metabolism; (hsa01240)Biosynthesis of cofactors		Distribution: Detected in many; Specificity: Tissue enriched	chrX:55030977-55009055	Human disease related genes:Congenital disorders of metabolism:Congenital disorders of cofactor/vitamin metabolism; Disease related genes; Potential drug targets; Enzymes; Predicted intracellular proteins; ENZYME proteins:Transferases		[GO:0003674] molecular_function; [GO:0043167] ion binding; [GO:0008150] biological_process; [GO:0009058] biosynthetic process; [GO:0034641] cellular nitrogen compound metabolic process; [GO:0005575] cellular_component; [GO:0005622] intracellular anatomical structure; [GO:0005737] cytoplasm; [GO:0043226] organelle; [GO:0005739] mitochondrion; [GO:0016746] acyltransferase activity; [GO:0042592] hom…	HP:0012187:Increased erythrocyte protoporphyrin concentration; HP:0011031:Abnormality of iron homeostasis; HP:0001924:Sideroblastic anemia; HP:0001952:Glucose intolerance; HP:0004840:Hypochromic microcytic anemia; HP:0001891:Iron deficiency anemia; HP:0001972:Macrocytic anemia; HP:0001423:X-linked dominant inheritance; HP:0000953:Hyperpigmentation of the skin; HP:0001081:Cholelithiasis; HP:000099…	Increased erythrocyte protoporphyrin concentration; Protoporphyria, Erythropoietic, X-Linked Dominant; Macrocytic dyserythropoietic anemia; Abnormality of iron homeostasis; Refractory anemia with ring sideroblasts associated with marked thrombocytosis; Secondary acquired sideroblastic anemia; Hyperbilirubinemia, Hereditary; Hereditary sideroblastic anemia; Chronic anemia; Mucopolysaccharidosis VI…	DOID:13270 erythropoietic protoporphyria;DOID:0060063 sideroblastic anemia 1	ALAS2	0	0	0	0	0	0	0	0	0	0	0	0	0	0	0	0
213	ALB	0	0	1	1	0	0	0	1	1	1	5	7	1	WP5115	ALB	albumin	GO:0051659 maintenance of mitochondrion location;GO:0051657 maintenance of organelle location;GO:0051646 mitochondrion localization	GO:0031093 platelet alpha granule lumen;GO:0031091 platelet alpha granule;GO:0072562 blood microparticle	GO:1903981 enterobactin binding;GO:0015643 toxic substance binding;GO:0005527 macrolide binding	This gene encodes the most abundant protein in human blood. This protein functions in the regulation of blood plasma colloid osmotic pressure and acts as a carrier protein for a wide range of endogenous molecules including hormones, fatty acids, and metabolites, as well as exogenous drugs. Additionally, this protein exhibits an esterase-like activity with broad substrate specificity. The encoded …	liver;spleen	(hsa04918)Thyroid hormone synthesis	Positivity in plasma and extracellular matrix.; antibody: Distinct staining was observed in extracellular matrix and plasma. Strong immunoreactivity was observed in membranes and cytoplasm of pneumocytes and alveolar macrophages. Renal tubules, trophoblasts, bladder, breast and endometrium showed cytoplasmic and/or membranous positivity. Normal cells in general displayed weak staining or were neg…	Distribution: Detected in many; Specificity: Tissue enriched	chr4:73404287-73421482	FDA approved drug targets:Small molecule drugs; Candidate cardiovascular disease genes; Cancer-related genes:Candidate cancer biomarkers; Predicted secreted proteins; Disease related genes; Predicted intracellular proteins	Golgi apparatus (Enhanced); Additional: Endoplasmic reticulum	[GO:0005575] cellular_component; [GO:0005576] extracellular region; [GO:0005615] extracellular space; [GO:0005622] intracellular anatomical structure; [GO:0005737] cytoplasm; [GO:0043226] organelle; [GO:0005794] Golgi apparatus; [GO:0005783] endoplasmic reticulum; [GO:0005634] nucleus; [GO:0032991] protein-containing complex; [GO:0003674] molecular_function; [GO:0043167] ion binding; [GO:0008150]…	HP:0032386:Elevated circulating transferrin concentration; HP:0005413:Increased alpha-globulin; HP:0030851:Low pulse pressure; HP:0003075:Hypoproteinemia; HP:0000282:Facial edema; HP:0010702:Increased circulating antibody level; HP:0005268:Spontaneous abortion; HP:0003141:Increased LDL cholesterol concentration; HP:0002783:Recurrent lower respiratory tract infections; HP:0002783:Recurrent lower r…	ALBUMIN B PHENOTYPE; ALBUMIN BLENHEIM PHENOTYPE; ANALBUMINEMIA BAGHDAD; Acute hemorrhagic ulcer of rectum; Analbuminemia; Cerebral arterial aneurysm; Congenital analbuminemia; Consciousness Disorders; Dysalbuminemic Hyperthyroxinemia; Fungal peritonitis; HIV Seropositivity; Increased alpha-globulin; Ketoacidosis due to acute alcohol intoxication; Low pulse pressure; Lupus enteritis; Murphy's sign…		ALB	0	0	0	0	0	0	0	0	0	0	0	0	0	0	0	0
215	ABCD1	0	0	1	0	0	0	0	0	0	0	1	1	0		ABCD1	ATP binding cassette subfamily D member 1	GO:0036113 very long-chain fatty-acyl-CoA catabolic process;GO:0015916 fatty-acyl-CoA transport;GO:1901337 thioester transport	GO:0005779 integral component of peroxisomal membrane;GO:0031231 intrinsic component of peroxisomal membrane;GO:0005778 peroxisomal membrane	GO:0015607 ABC-type fatty-acyl-CoA transporter activity;GO:0071077 adenosine 3',5'-bisphosphate transmembrane transporter activity;GO:0005324 long-chain fatty acid transporter activity	The protein encoded by this gene is a member of the superfamily of ATP-binding cassette (ABC) transporters. ABC proteins transport various molecules across extra- and intra-cellular membranes. ABC genes are divided into seven distinct subfamilies (ABC1, MDR/TAP, MRP, ALD, OABP, GCN20, White). This protein is a member of the ALD subfamily, which is involved in peroxisomal import of fatty acids and…	cervix	(hsa02010)ABC transporters; (hsa04146)Peroxisome	antibody: A subset of cells in seminiferus ducts and small intestine showed strong cytoplasmic staining with a granular pattern. Gall bladder, renal tubules, placental trophoblasts, smooth and skeletal myocytes displayed moderate positivity. Remaining normal tissues were weakly stained or negative. ; Cytoplasmic expression in most tissues.	Distribution: Detected in many; Specificity: Low tissue specificity	chrX:153724851-153744755	ENZYME proteins; Human disease related genes:Congenital disorders of metabolism:Congenital disorders of lipid/glycolipid metabolism; Disease related genes; Potential drug targets; Enzymes; Human disease related genes:Congenital disorders of metabolism:Peroxisomal diseases; Transporters:Primary Active Transporters		[GO:0005575] cellular_component; [GO:0003674] molecular_function; [GO:0043167] ion binding; [GO:0008150] biological_process; [GO:0006810] transport; [GO:0055085] transmembrane transport; [GO:0044281] small molecule metabolic process; [GO:0009056] catabolic process; [GO:0006629] lipid metabolic process; [GO:0005622] intracellular anatomical structure; [GO:0005737] cytoplasm; [GO:0043226] organelle…	HP:0100816:Lip hyperpigmentation; HP:0012501:Abnormality of the brainstem white matter; HP:0010284:Intra-oral hyperpigmentation; HP:0007006:Dorsal column degeneration; HP:0100291:Abnormality of central somatosensory evoked potentials; HP:0031993:Hoffmann sign; HP:0004359:Abnormal circulating fatty-acid concentration; HP:0031845:Abnormal libido; HP:0004359:Abnormal circulating fatty-acid concentra…	Contiguous ABCD1 DXS1357E deletion syndrome; Contiguous Abcd1-Dxs1375e Deletion Syndrome; Dysfunction adrenal; Hypoadrenocorticism, familial; Diffuse Cerebral Sclerosis of Schilder; Zellweger Spectrum Disorder; Impaired distal proprioception; Serum lipids high (finding); Cerebral Adrenoleukodystrophy; Impaired vibration sensation at ankles; Hyperargininemia; Testicular dysfunction; Romberg's sign…	DOID:10588 adrenoleukodystrophy	ABCD1	0	0	0	0	0	0	0	0	0	0	0	0	0	0	0	0
216	ALDH1A1	0	0	0	0	0	0	0	0	1	0	1	1	0		ALDH1A1	aldehyde dehydrogenase 1 family member A1	GO:0030392 fructosamine catabolic process;GO:0030389 fructosamine metabolic process;GO:0009449 gamma-aminobutyric acid biosynthetic process	GO:0030424 axon;GO:0045202 synapse;GO:0043005 neuron projection	GO:0106373 3-deoxyglucosone dehydrogenase activity;GO:0019145 aminobutyraldehyde dehydrogenase activity;GO:0018479 benzaldehyde dehydrogenase (NAD+) activity	The protein encoded by this gene belongs to the aldehyde dehydrogenase family. Aldehyde dehydrogenase is the next enzyme after alcohol dehydrogenase in the major pathway of alcohol metabolism. There are two major aldehyde dehydrogenase isozymes in the liver, cytosolic and mitochondrial, which are encoded by distinct genes, and can be distinguished by their electrophoretic mobility, kinetic proper…	small_intestine	(hsa00830)Retinol metabolism; (hsa01100)Metabolic pathways	antibody: Weak to moderate cytoplasmic staining was observed in hepatocytes and in glandular cells of stomach, pancreas and epididymis. In vulva/anal skin, a membranous positivity was found, while gallbladder and testis showed nuclear staining. Remaining normal tissues were negative.; Cytoplasmic expression in selected tissues.	Distribution: Detected in many; Specificity: Tissue enhanced	chr9:72953053-72900671	Enzymes; Predicted intracellular proteins; ENZYME proteins:Oxidoreductases	Cytosol (Enhanced)	[GO:0003674] molecular_function; [GO:0016491] oxidoreductase activity; [GO:0005575] cellular_component; [GO:0005622] intracellular anatomical structure; [GO:0005737] cytoplasm; [GO:0005829] cytosol; [GO:0008150] biological_process; [GO:0030234] enzyme regulator activity; [GO:0044281] small molecule metabolic process; [GO:0006629] lipid metabolic process; [GO:0043226] organelle; [GO:0005576] extra…		Gastric Neuroendocrine Carcinoma; Erythroplakia of mouth; Adrenal Cortex Diseases; alcohol effect; cortex bone disorders; Chronic cholecystitis; Hemorrhagic cystitis; Creutzfeldt-Jakob Disease, Familial; New Variant Creutzfeldt-Jakob Disease; Gastrooesophageal cancer; Malignant neoplasm of cardioesophageal junction of stomach; recurrent muscle twitches (symptom); Autosomal Dominant Juvenile Parki…		ALDH1A1	0	0	0	0	0	0	0	0	0	0	0	0	0	0	0	0
218	ALDH3A1	0	0	0	0	0	0	0	0	0	1	1	1	0		ALDH3A1	aldehyde dehydrogenase 3 family member A1	GO:0006081 cellular aldehyde metabolic process;GO:0006805 xenobiotic metabolic process;GO:0071466 cellular response to xenobiotic stimulus	GO:0005783 endoplasmic reticulum;GO:0005615 extracellular space;GO:0005576 extracellular region	GO:0018479 benzaldehyde dehydrogenase (NAD+) activity;GO:0019115 benzaldehyde dehydrogenase [NAD(P)+] activity;GO:0004028 3-chloroallyl aldehyde dehydrogenase activity	Aldehyde dehydrogenases oxidize various aldehydes to the corresponding acids. They are involved in the detoxification of alcohol-derived acetaldehyde and in the metabolism of corticosteroids, biogenic amines, neurotransmitters, and lipid peroxidation. The enzyme encoded by this gene forms a cytoplasmic homodimer that preferentially oxidizes aromatic and medium-chain (6 carbons or more) saturated …	eye	(hsa00360)Phenylalanine metabolism; (hsa00340)Histidine metabolism; (hsa00410)beta-Alanine metabolism	Mainly cytoplasmic expression in several tissues, most abundant in squamous epithelia and stomach.; antibody: Strong cytoplasmic and nuclear staining was observed in squamous epithelia. Gastrointestinal glands displayed strong luminal membranous positivity. Lymphoid tissue showed strong cytoplasmic staining. Remaining normal tissues were mainly negative.	Distribution: Detected in many; Specificity: Tissue enhanced	chr17:19748390-19737984	Enzymes; Predicted intracellular proteins; ENZYME proteins:Oxidoreductases	Cytosol;Plasma membrane (Supported); Additional: Nucleoplasm;Vesicles	[GO:0003674] molecular_function; [GO:0016491] oxidoreductase activity; [GO:0008150] biological_process; [GO:0005575] cellular_component; [GO:0005622] intracellular anatomical structure; [GO:0005737] cytoplasm; [GO:0005829] cytosol; [GO:0005886] plasma membrane; [GO:0005576] extracellular region; [GO:0005615] extracellular space; [GO:0043226] organelle; [GO:0005783] endoplasmic reticulum		Recurrent pterygium; Corneal Scar; Hemorrhagic cystitis; Sjogren-Larsson Syndrome; Lens Opacities; Pseudoaphakia; Hepatocellular Adenoma; Salivary Gland Neoplasms; Mucoepidermoid Carcinoma; Pterygium Of Conjunctiva And Cornea; Pterygium of eye; Mixed Salivary Gland Tumor; Tonometry; Pterygium; Breast adenocarcinoma; Stomach Neoplasms; Cataract; Multiple Chronic Conditions; Fetal Growth Retardatio…		ALDH3A1	0	0	1	0	0	0	0	0	0	0	0	0	0	0	0	0
222	ALDH3B2	0	1	0	0	0	0	0	1	0	0	2	2	0		ALDH3B2	aldehyde dehydrogenase 3 family member B2	GO:0006068 ethanol catabolic process;GO:0034310 primary alcohol catabolic process;GO:0006067 ethanol metabolic process	GO:0005811 lipid droplet;GO:0043228 non-membrane-bounded organelle;GO:0043232 intracellular non-membrane-bounded organelle	GO:0004028 3-chloroallyl aldehyde dehydrogenase activity;GO:0043878 glyceraldehyde-3-phosphate dehydrogenase (NAD+) (non-phosphorylating) activity;GO:0004029 aldehyde dehydrogenase (NAD+) activity	This gene encodes a member of the aldehyde dehydrogenase family, a group of isozymes that may play a major role in the detoxification of aldehydes generated by alcohol metabolism and lipid peroxidation. The gene of this particular family member is over 10 kb in length. Altered methylation patterns at this locus have been observed in spermatozoa derived from patients exhibiting reduced fecundity. …	bladder;mammary_gland	(hsa00360)Phenylalanine metabolism; (hsa00340)Histidine metabolism; (hsa00410)beta-Alanine metabolism	antibody: Smooth muscle, renal glomeruli, adipocytes and pneumocytes showed strong cytoplasmic and membranous staining. Moderate cytoplasmic positivity was observed in gall bladder, fibroblasts and exocrine pancreas. Neurons displayed nuclear positivity. Remaining normal tissues were in general weakly stained or negative.; Cytoplasmic expression in several tissues including breast.	Distribution: Detected in many; Specificity: Group enriched	chr11:67681252-67662155	Enzymes; FDA approved drug targets:Small molecule drugs; Predicted intracellular proteins; ENZYME proteins:Oxidoreductases		[GO:0003674] molecular_function; [GO:0016491] oxidoreductase activity; [GO:0008150] biological_process; [GO:0005575] cellular_component; [GO:0005622] intracellular anatomical structure; [GO:0005737] cytoplasm; [GO:0043226] organelle; [GO:0005811] lipid droplet; [GO:0006629] lipid metabolic process; [GO:0009058] biosynthetic process; [GO:0044281] small molecule metabolic process; [GO:0009056] cata…		Alcoholic Intoxication, Chronic		ALDH3B2	0	0	0	0	0	0	0	0	0	0	0	0	0	0	0	0
238	ALK	0	0	1	0	0	0	0	1	1	1	4	6	0		ALK	ALK receptor tyrosine kinase	GO:0090648 response to environmental enrichment;GO:0036269 swimming behavior;GO:0060159 regulation of dopamine receptor signaling pathway	GO:0043235 receptor complex;GO:0005887 integral component of plasma membrane;GO:0031226 intrinsic component of plasma membrane	GO:0004704 NF-kappaB-inducing kinase activity;GO:0004714 transmembrane receptor protein tyrosine kinase activity;GO:0019199 transmembrane receptor protein kinase activity	This gene encodes a receptor tyrosine kinase, which belongs to the insulin receptor superfamily. This protein comprises an extracellular domain, an hydrophobic stretch corresponding to a single pass transmembrane region, and an intracellular kinase domain. It plays an important role in the development of the brain and exerts its effects on specific neurons in the nervous system. This gene has bee…		(hsa05223)Non-small cell lung cancer; (hsa05235)PD-L1 expression and PD-1 checkpoint pathway in cancer; (hsa05200)Pathways in cancer	Cytoplasmic and nuclear expression in several different tissue types, most abundant in neurons.; antibody: Neuronal cells and skeletal muscle showed strong cytoplasmic and nuclear immunoreactivity. Distinct luminal staining was observed in a number of tissues, e.g. the intestine, endometrial glands and fallopian tube. Most other normal tissues showed weak cytoplasmic positivity, sometimes combine…	Distribution: Detected in some; Specificity: Tissue enriched	chr2:29921589-29190992	FDA approved drug targets:Small molecule drugs; Cancer-related genes:Mutated cancer genes; CD markers; Human disease related genes:Cancers:Cancers of haematopoietic and lymphoid tissues; Kinases:Tyr protein kinases; Disease related genes; Enzymes; Human disease related genes:Cancers:Cancers of the lung and pleura; Predicted intracellular proteins; ENZYME proteins:Transferases	Plasma membrane (Supported)	[GO:0003674] molecular_function; [GO:0043167] ion binding; [GO:0008150] biological_process; [GO:0007165] signal transduction; [GO:0005575] cellular_component; [GO:0006464] cellular protein modification process; [GO:0016301] kinase activity; [GO:0048856] anatomical structure development; [GO:0030154] cell differentiation; [GO:0005886] plasma membrane; [GO:0008219] cell death; [GO:0043226] organell…	HP:0011976:Elevated urinary catecholamines; HP:0011976:Elevated urinary catecholamines; HP:0004375:Neoplasm of the nervous system; HP:0004375:Neoplasm of the nervous system	Anaplastic Medulloblastoma; Anaplastic large cell lymphoma T- and null-cell types refractory; Leiomyoma of small intestine; Myxoid leiomyoma; NEUROBLASTOMA, SUSCEPTIBILITY TO, 3; Subclavicular lymphadenopathy; Tumor lysis syndrome (spontaneous); Compound nevus of skin; Congenital neuroblastoma; Deep Penetrating Nevus; Disorder of pericardium; Granuloma, Plasma Cell; Inflammatory pseudotumor of li…		ALK	0	0	0	0	0	0	0	0	0	0	0	0	0	1	0	0
239	ALOX12	0	0	0	0	0	0	0	0	1	0	1	1	0		ALOX12	arachidonate 12-lipoxygenase, 12S type	GO:2001304 lipoxin B4 metabolic process;GO:2001306 lipoxin B4 biosynthetic process;GO:1901751 leukotriene A4 metabolic process	GO:0042383 sarcolemma;GO:0070062 extracellular exosome;GO:1903561 extracellular vesicle	GO:0047977 hepoxilin-epoxide hydrolase activity;GO:0016165 linoleate 13S-lipoxygenase activity;GO:0050473 arachidonate 15-lipoxygenase activity	This gene encodes a member of the lipoxygenase family of proteins. The encoded enzyme acts on different polyunsaturated fatty acid substrates to generate bioactive lipid mediators including eicosanoids and lipoxins. The encoded enzyme and its reaction products have been shown to regulate platelet function. Elevated expression of this gene has been observed in pancreatic islets derived from human …		(hsa01523)Antifolate resistance; (hsa00590)Arachidonic acid metabolism; (hsa04750)Inflammatory mediator regulation of TRP channels	Cytoplasmic expression in several tissues, most abundant in squamous epithelia.; antibody: Most normal tissues showed moderate cytoplasmic positivity. Squamous epithelial cells, glandular cells of parathyroid gland, cells in the red pulp of spleen, neuronal cells of cerebral cortex and myocytes of heart and skeletal muscles displayed strong positivity.	Distribution: Detected in many; Specificity: Tissue enhanced	chr17:6993791-7010754	ENZYME proteins:Oxidoreductases; Disease related genes; Potential drug targets; Enzymes; Predicted intracellular proteins	Cytosol (Supported); Additional: Nuclear speckles;Vesicles	[GO:0003674] molecular_function; [GO:0043167] ion binding; [GO:0016491] oxidoreductase activity; [GO:0005575] cellular_component; [GO:0005622] intracellular anatomical structure; [GO:0005737] cytoplasm; [GO:0008150] biological_process; [GO:0006629] lipid metabolic process; [GO:0044281] small molecule metabolic process; [GO:0005829] cytosol; [GO:0005886] plasma membrane; [GO:0043226] organelle; [G…		Pleural mesothelioma malignant advanced; Toxoplasmosis, Congenital; Acute Myeloid Leukemia with Myelodysplasia-Related Changes; Hypertrophy of kidney; Vitelliform Macular Dystrophy; Allodynia; Hyperalgesia, Primary; Becker Muscular Dystrophy; Hyperalgesia, Secondary; Airway Obstruction; Toxoplasmosis; Tactile Allodynia; Testicular Neoplasms; Polyarthritis, Juvenile, Rheumatoid Factor Negative; Po…		ALOX12	0	0	0	0	0	0	0	0	0	0	0	0	0	0	0	0
240	ALOX5	0	0	1	0	0	0	0	0	0	0	1	1	0		ALOX5	arachidonate 5-lipoxygenase	GO:1901753 leukotriene A4 biosynthetic process;GO:1901751 leukotriene A4 metabolic process;GO:0002538 arachidonic acid metabolite production involved in inflammatory response	GO:0005641 nuclear envelope lumen;GO:0031970 organelle envelope lumen;GO:0016363 nuclear matrix	GO:0004051 arachidonate 5-lipoxygenase activity;GO:0036403 arachidonate 8(S)-lipoxygenase activity;GO:0004052 arachidonate 12(S)-lipoxygenase activity	This gene encodes a member of the lipoxygenase gene family and plays a dual role in the synthesis of leukotrienes from arachidonic acid. The encoded protein, which is expressed specifically in bone marrow-derived cells, catalyzes the conversion of arachidonic acid to 5(S)-hydroperoxy-6-trans-8,11,14-cis-eicosatetraenoic acid, and further to the allylic epoxide 5(S)-trans-7,9-trans-11,14-cis-eicos…	blood;lymph_node	(hsa04913)Ovarian steroidogenesis; (hsa00590)Arachidonic acid metabolism; (hsa04664)Fc epsilon RI signaling pathway	Nuclear and nuclear membranous expression in several tissues, most abundant in subsets of immune cells.; antibody: Nuclear membranous and nuclear staining of various intensity was observed in subsets of immune cells and a few other normal cell types including urothelial cells, glandular cells in pancreatic islets of Langerhans, cells in granular layer in cerebellum and glial cells in brain.	Distribution: Detected in many; Specificity: Tissue enhanced	chr10:45374209-45446121	Enzymes; FDA approved drug targets:Small molecule drugs; Predicted intracellular proteins; ENZYME proteins:Oxidoreductases	Nucleoplasm (Supported)	[GO:0003674] molecular_function; [GO:0043167] ion binding; [GO:0016491] oxidoreductase activity; [GO:0005575] cellular_component; [GO:0005622] intracellular anatomical structure; [GO:0043226] organelle; [GO:0005634] nucleus; [GO:0005737] cytoplasm; [GO:0005654] nucleoplasm; [GO:0005635] nuclear envelope; [GO:0005829] cytosol; [GO:0005576] extracellular region; [GO:0005615] extracellular space; [G…	HP:4000007:Bronchoconstriction; HP:0001426:Multifactorial inheritance; HP:0002099:Asthma; HP:0000006:Autosomal dominant inheritance	Radiation Pneumonitis; Adenomatous polyp of colon; Moderate persistent asthma; Asthma aspirin-sensitive; Pleural mesothelioma malignant advanced; ASA intolerant asthma; Cerebral Adrenoleukodystrophy; Tularemia; Aluminium overload; Other specified forms of pleural effusion, except tuberculous; Bacterial keratitis; Homocysteinemia; Morbilliform Drug Reaction; Asthma, Aspirin-Induced; Multiple Organ…	DOID:2841 asthma	ALOX5	0	0	0	0	0	0	0	0	0	0	0	0	0	0	0	0
241	ALOX5AP	0	1	0	0	0	0	0	0	1	1	3	6	0		ALOX5AP	arachidonate 5-lipoxygenase activating protein	GO:0002538 arachidonic acid metabolite production involved in inflammatory response;GO:0002540 leukotriene production involved in inflammatory response;GO:0019372 lipoxygenase pathway	GO:0031965 nuclear membrane;GO:0005635 nuclear envelope;GO:0005789 endoplasmic reticulum membrane	GO:0004051 arachidonate 5-lipoxygenase activity;GO:0004464 leukotriene-C4 synthase activity;GO:0050543 icosatetraenoic acid binding	This gene encodes a protein which, with 5-lipoxygenase, is required for leukotriene synthesis. Leukotrienes are arachidonic acid metabolites which have been implicated in various types of inflammatory responses, including asthma, arthritis and psoriasis. This protein localizes to the plasma membrane. Inhibitors of its function impede translocation of 5-lipoxygenase from the cytoplasm to the cell …	blood	(hsa04664)Fc epsilon RI signaling pathway	Cytoplasmic and nuclear membrane expression in several tissues, including lymphoid tissue.; antibody: Subsets of lymphoid, inflammatory and bone marrow poietic cells showed strong cytoplasmic and nuclear membrane immunoreactivity. Remaining normal tissues were negative.	Distribution: Detected in all; Specificity: Group enriched	chr13:30713485-30764426	Disease related genes		[GO:0005575] cellular_component; [GO:0003674] molecular_function; [GO:0008150] biological_process; [GO:0044281] small molecule metabolic process; [GO:0005622] intracellular anatomical structure; [GO:0043226] organelle; [GO:0005634] nucleus; [GO:0005737] cytoplasm; [GO:0005783] endoplasmic reticulum; [GO:0005635] nuclear envelope; [GO:0009058] biosynthetic process; [GO:0016765] transferase activit…	HP:0001426:Multifactorial inheritance; HP:0001297:Stroke	response to epirubicin; Ventilatory defect; Retinal Perforations; ASA intolerant asthma; Anterior Choroidal Artery Infarction; Cerebral Infarction, Left Hemisphere; Cerebral Infarction, Right Hemisphere; Posterior Choroidal Artery Infarction; Thrombotic stroke; Subcortical Infarction; Encephalopathy, Toxic; Toxic Encephalitis; Xanthoma; Neurotoxicity Syndromes; Macular Holes; Myocardial infarctio…	DOID:3526 cerebral infarction	ALOX5AP	1	0	0	0	0	0	0	0	0	0	0	0	0	0	0	0
246	ALOX15	0	1	0	0	0	0	0	0	1	0	2	2	0		ALOX15	arachidonate 15-lipoxygenase	GO:2001303 lipoxin A4 biosynthetic process;GO:0035962 response to interleukin-13;GO:0035963 cellular response to interleukin-13	GO:0031234 extrinsic component of cytoplasmic side of plasma membrane;GO:0005811 lipid droplet;GO:0009898 cytoplasmic side of plasma membrane	GO:0016165 linoleate 13S-lipoxygenase activity;GO:0050473 arachidonate 15-lipoxygenase activity;GO:0004052 arachidonate 12(S)-lipoxygenase activity	This gene encodes a member of the lipoxygenase family of proteins. The encoded enzyme acts on various polyunsaturated fatty acid substrates to generate various bioactive lipid mediators such as eicosanoids, hepoxilins, lipoxins, and other molecules. The encoded enzyme and its reaction products have been shown to regulate inflammation and immunity. Multiple pseudogenes of this gene have been ident…		(hsa00591)Linoleic acid metabolism; (hsa04216)Ferroptosis; (hsa00590)Arachidonic acid metabolism	Cytoplasmic expression in respiratory epithelial cells and subsets of immune cells.; antibody: Strong cytoplasmic positivity was observed in respiratory epithelium and in subsets of immune cells in several tissues, including lymphoid organs. Strong membranous positivity was observed in salivary gland and renal cells. Intestinal glandular cells displayed weak to moderate membranous immunoreactivit…	Distribution: Detected in many; Specificity: Tissue enhanced	chr17:4641678-4630919	ENZYME proteins:Oxidoreductases; Disease related genes; Potential drug targets; Enzymes; Predicted intracellular proteins		[GO:0003674] molecular_function; [GO:0043167] ion binding; [GO:0016491] oxidoreductase activity; [GO:0005575] cellular_component; [GO:0005622] intracellular anatomical structure; [GO:0005737] cytoplasm; [GO:0005886] plasma membrane; [GO:0008150] biological_process; [GO:0006629] lipid metabolic process; [GO:0044281] small molecule metabolic process; [GO:0005829] cytosol; [GO:0009058] biosynthetic …		Olmsted syndrome; Pleural mesothelioma malignant advanced; Bacterial keratitis; Leukostasis; asthma with copd; Early childhood caries; SCAPULOPERONEAL MYOPATHY, X-LINKED DOMINANT; Aspergillosis, Allergic Bronchopulmonary; Placental dysfunction; Nematode infections; Heart Failure, Diastolic; Atherogenesis; Dental Fluorosis, Acquired; Carcinoma, Lobular; Vitelliform Macular Dystrophy; Enteritis; Be…		ALOX15	0	0	0	0	0	0	0	0	0	0	0	0	0	0	0	0
247	ALOX15B	0	0	1	0	0	0	0	0	0	0	1	1	0		ALOX15B	arachidonate 15-lipoxygenase type B	GO:1901696 cannabinoid biosynthetic process;GO:2001303 lipoxin A4 biosynthetic process;GO:0071926 endocannabinoid signaling pathway	GO:0005912 adherens junction;GO:0019898 extrinsic component of membrane;GO:0005925 focal adhesion	GO:0036403 arachidonate 8(S)-lipoxygenase activity;GO:1990136 linoleate 9S-lipoxygenase activity;GO:0016165 linoleate 13S-lipoxygenase activity	This gene encodes a member of the lipoxygenase family of structurally related nonheme iron dioxygenases involved in the production of fatty acid hydroperoxides. The encoded protein converts arachidonic acid exclusively to 15S-hydroperoxyeicosatetraenoic acid, while metabolizing linoleic acid less effectively. This gene is located in a cluster of related genes and a pseudogene that spans approxima…	prostate;skin	(hsa00590)Arachidonic acid metabolism; (hsa04726)Serotonergic synapse; (hsa01100)Metabolic pathways	antibody: Cytoplasmic staining of varying intensity was observed in several normal tissues including prostate, breast, lung and ovary.; Cytoplasmic expression in several tissues, including breast, prostate and lung.	Distribution: Detected in many; Specificity: Tissue enhanced	chr17:8039059-8049134	Enzymes; Predicted intracellular proteins; ENZYME proteins:Oxidoreductases	Cytosol;Plasma membrane (Supported)	[GO:0003674] molecular_function; [GO:0043167] ion binding; [GO:0016491] oxidoreductase activity; [GO:0005575] cellular_component; [GO:0005622] intracellular anatomical structure; [GO:0005737] cytoplasm; [GO:0005829] cytosol; [GO:0005886] plasma membrane; [GO:0008150] biological_process; [GO:0044281] small molecule metabolic process; [GO:0006629] lipid metabolic process; [GO:0043226] organelle; [G…		Prostatic Hyperplasia; Adrenal Cortical Adenoma; PACHYONYCHIA CONGENITA 3; Adenocarcinoma of prostate; Aplasia Cutis Congenita; Precancerous Conditions; Hypercholesterolemia; Agenesis of corpus callosum; Malignant Head and Neck Neoplasm; Benign Prostatic Hyperplasia; Head and Neck Carcinoma; Esophageal Neoplasms; Coronary Arteriosclerosis; Malignant neoplasm of esophagus; Esophageal carcinoma; Co…		ALOX15B	0	0	0	0	0	0	0	0	0	0	0	0	0	0	0	0
258	AMBN	1	0	0	0	0	0	0	0	0	0	1	1	0		AMBN	ameloblastin	GO:0042475 odontogenesis of dentin-containing tooth;GO:0031214 biomineral tissue development;GO:0110148 biomineralization	GO:0005788 endoplasmic reticulum lumen;GO:0005783 endoplasmic reticulum;GO:0005576 extracellular region	GO:0030345 structural constituent of tooth enamel;GO:0030021 extracellular matrix structural constituent conferring compression resistance;GO:0008083 growth factor activity	This gene encodes the nonamelogenin enamel matrix protein ameloblastin. The encoded protein may be important in enamel matrix formation and mineralization. This gene is located in the calcium-binding phosphoprotein gene cluster on chromosome 4. Mutations in this gene may be associated with dentinogenesis imperfect and autosomal dominant amylogenesis imperfect. [provided by RefSeq, Aug 2011]				Distribution: Not detected; Specificity: Not detected	chr4:70592256-70607288	Predicted secreted proteins; Human disease related genes:Digestive system diseases:Mouth and dental diseases; Disease related genes	Vesicles (Uncertain); Additional: Nucleoplasm	[GO:0003674] molecular_function; [GO:0005198] structural molecule activity; [GO:0008150] biological_process; [GO:0048856] anatomical structure development; [GO:0007165] signal transduction; [GO:0005575] cellular_component; [GO:0005576] extracellular region; [GO:0007155] cell adhesion; [GO:0005622] intracellular anatomical structure; [GO:0005737] cytoplasm; [GO:0043226] organelle; [GO:0005783] end…	HP:0009722:Dental enamel pits; HP:0011073:Abnormality of dental color; HP:0000705:Amelogenesis imperfecta; HP:0006297:Enamel hypoplasia; HP:0003593:Infantile onset; HP:0000007:Autosomal recessive inheritance	AMELOGENESIS IMPERFECTA, TYPE IF; Calcifying Epithelial Odontogenic Tumor; Squamous odontogenic tumor; Ameloblastic fibroma; Dental enamel pits; Amelogenesis Imperfecta, Type IB; Amelogenesis imperfecta local hypoplastic form; Abnormality of dental color; Calcifying Odontogenic Cyst; Adenoameloblastoma; Scab; Amelogenesis Imperfecta; Odontogenic Tumors; Dental Enamel Hypoplasia; Caries (morpholog…	DOID:0110065 amelogenesis imperfecta type 1F	AMBN	0	0	0	0	0	0	0	0	0	0	0	0	0	0	0	0
267	AMFR	0	0	0	0	0	1	0	0	0	0	1	1	0		AMFR	autocrine motility factor receptor	GO:2000638 regulation of SREBP signaling pathway;GO:1904380 endoplasmic reticulum mannose trimming;GO:0036507 protein demannosylation	GO:0036513 Derlin-1 retrotranslocation complex;GO:0044322 endoplasmic reticulum quality control compartment;GO:0140534 endoplasmic reticulum protein-containing complex	GO:1904288 BAT3 complex binding;GO:0034450 ubiquitin-ubiquitin ligase activity;GO:1990381 ubiquitin-specific protease binding	This locus encodes a glycosylated transmembrane receptor. Its ligand, autocrine motility factor, is a tumor motility-stimulating protein secreted by tumor cells. The encoded receptor is also a member of the E3 ubiquitin ligase family of proteins. It catalyzes ubiquitination and endoplasmic reticulum-associated degradation of specific proteins. [provided by RefSeq, Feb 2012]	blood	(hsa04141)Protein processing in endoplasmic reticulum	General cytoplasmic and membranous expression in several tissues.; antibody: Most normal tissues tissues showed moderate cytoplasmic positivity. Strong immunoreactivity was for example observed in the gastrointestinal tract, testis, renal tubules, reaction center cells in lymphoid tissues and skeletal muscle cells.	Distribution: Detected in all; Specificity: Low tissue specificity	chr16:56425545-56361452	Enzymes; Predicted intracellular proteins; ENZYME proteins:Transferases	Endoplasmic reticulum;Golgi apparatus (Supported)	[GO:0003674] molecular_function; [GO:0032182] ubiquitin-like protein binding; [GO:0005575] cellular_component; [GO:0005622] intracellular anatomical structure; [GO:0005737] cytoplasm; [GO:0043226] organelle; [GO:0005794] Golgi apparatus; [GO:0043167] ion binding; [GO:0005783] endoplasmic reticulum; [GO:0008150] biological_process; [GO:0006464] cellular protein modification process; [GO:0007267] c…		Protein Misfolding Disorders; Adult Acute Monocytic Leukemia; Childhood Acute Monocytic Leukemia; alpha 1-Antitrypsin Deficiency; Acute Confusional Senile Dementia; Alzheimer's Disease, Focal Onset; Japanese Encephalitis; M5b Acute differentiated monocytic leukemia; Disease Exacerbation; Primary differentiated carcinoma of thyroid gland; Alzheimer Disease, Early Onset; Differentiated Thyroid Glan…		AMFR	0	0	0	0	0	0	0	0	0	0	0	0	0	0	0	0
268	AMH	0	1	0	0	0	1	0	0	0	0	2	3	0		AMH	anti-Mullerian hormone	GO:2000355 negative regulation of ovarian follicle development;GO:0001546 preantral ovarian follicle growth;GO:0048162 multi-layer follicle stage	GO:0005615 extracellular space;GO:0005576 extracellular region;GO:0110165 cellular anatomical entity	GO:0005114 type II transforming growth factor beta receptor binding;GO:0005160 transforming growth factor beta receptor binding;GO:0005179 hormone activity	This gene encodes a secreted ligand of the TGF-beta (transforming growth factor-beta) superfamily of proteins. Ligands of this family bind various TGF-beta receptors leading to recruitment and activation of SMAD family transcription factors that regulate gene expression. The encoded preproprotein is proteolytically processed to generate N- and C-terminal cleavage products that homodimerize and as…		(hsa04350)TGF-beta signaling pathway; (hsa04390)Hippo signaling pathway; (hsa04024)cAMP signaling pathway		Distribution: Detected in some; Specificity: Group enriched	chr19:2249323-2252073	Predicted secreted proteins; Disease related genes; Human disease related genes:Reproductive system diseases:Reproductive system diseases	Aggresome;Vesicles (Approved)	[GO:0003674] molecular_function; [GO:0008150] biological_process; [GO:0000003] reproduction; [GO:0048856] anatomical structure development; [GO:0007165] signal transduction; [GO:0005575] cellular_component; [GO:0005576] extracellular region; [GO:0030154] cell differentiation; [GO:0005615] extracellular space; [GO:0007267] cell-cell signaling; [GO:0040007] growth; [GO:0007568] aging; [GO:0009058] …	HP:0003117:Abnormal circulating hormone concentration; HP:0000022:Abnormality of male internal genitalia; HP:0008689:Bilateral cryptorchidism; HP:0000037:Male pseudohermaphroditism; HP:0003251:Male infertility; HP:0000023:Inguinal hernia; HP:0000023:Inguinal hernia; HP:0000028:Cryptorchidism; HP:0000007:Autosomal recessive inheritance	Degenerative scoliosis; Freemartinism; Incipient ovarian failure; Mullerian inhibiting factor deficiency; Cholemia; Freemartin; Sex Chromosome Disorders of Sex Development; ovarian cystic disease; Congenital absence of both testes; Discitis; Follicular cyst; Lumbar radiculopathy; Abnormality of male internal genitalia; Isosexual precocious puberty; Adrenal hyperplasia, congenital, type 5; Asherma…	DOID:0050791 persistent Mullerian duct syndrome	AMH	0	0	0	0	0	0	0	0	0	0	0	0	0	0	0	0
269	AMHR2	0	1	0	0	0	0	0	0	0	0	1	3	0		AMHR2	anti-Mullerian hormone receptor type 2	GO:1990262 anti-Mullerian hormone signaling pathway;GO:0001880 Mullerian duct regression;GO:0060389 pathway-restricted SMAD protein phosphorylation	GO:0048179 activin receptor complex;GO:1902554 serine/threonine protein kinase complex;GO:1902911 protein kinase complex	GO:1990272 anti-Mullerian hormone receptor activity;GO:0005026 transforming growth factor beta receptor activity, type II;GO:0017002 activin-activated receptor activity	This gene encodes the receptor for the anti-Mullerian hormone (AMH) which, in addition to testosterone, results in male sex differentiation. AMH and testosterone are produced in the testes by different cells and have different effects. Testosterone promotes the development of male genitalia while the binding of AMH to the encoded receptor prevents the development of the mullerian ducts into uteru…		(hsa04350)TGF-beta signaling pathway; (hsa04060)Cytokine-cytokine receptor interaction		Distribution: Detected in some; Specificity: Tissue enhanced	chr12:53423855-53431672	Kinases:TKL Ser/Thr protein kinases; Human disease related genes:Reproductive system diseases:Reproductive system diseases; Disease related genes; Potential drug targets; Enzymes; Predicted intracellular proteins; ENZYME proteins:Transferases	Vesicles (Approved); Additional: Cytosol;Nucleoplasm	[GO:0003674] molecular_function; [GO:0043167] ion binding; [GO:0005575] cellular_component; [GO:0008150] biological_process; [GO:0006464] cellular protein modification process; [GO:0016301] kinase activity; [GO:0007165] signal transduction; [GO:0005886] plasma membrane; [GO:0000003] reproduction; [GO:0032991] protein-containing complex; [GO:0048856] anatomical structure development	HP:0003117:Abnormal circulating hormone concentration; HP:0000022:Abnormality of male internal genitalia; HP:0008689:Bilateral cryptorchidism; HP:0000037:Male pseudohermaphroditism; HP:0003251:Male infertility; HP:0000023:Inguinal hernia; HP:0000023:Inguinal hernia; HP:0000028:Cryptorchidism; HP:0000007:Autosomal recessive inheritance	Oophoritis; PERSISTENT MULLERIAN DUCT SYNDROME, TYPE II; Abnormality of male internal genitalia; Persistent Mullerian duct syndrome; Pseudohermaphroditism; Female Urogenital Diseases; fertility disorders; Uterine Cervicitis; Testicular Feminization; Rokitansky Kuster Hauser syndrome; Dysgerminoma; Bilateral Cryptorchidism; Extraskeletal Myxoid Chondrosarcoma; Male Pseudohermaphroditism; Ovarian H…	DOID:0050791 persistent Mullerian duct syndrome	AMHR2	0	0	0	0	0	0	0	0	0	0	0	0	0	0	0	0
270	AMPD1	0	1	1	0	0	1	0	1	0	1	5	8	0		AMPD1	adenosine monophosphate deaminase 1	GO:0032263 GMP salvage;GO:0032264 IMP salvage;GO:0106380 purine ribonucleotide salvage	GO:0005829 cytosol;GO:0005737 cytoplasm;GO:0005622 intracellular anatomical structure	GO:0003876 AMP deaminase activity;GO:0047623 adenosine-phosphate deaminase activity;GO:0019239 deaminase activity	Adenosine monophosphate deaminase 1 catalyzes the deamination of AMP to IMP in skeletal muscle and plays an important role in the purine nucleotide cycle. Two other genes have been identified, AMPD2 and AMPD3, for the liver- and erythocyte-specific isoforms, respectively. Deficiency of the muscle-specific enzyme is apparently a common cause of exercise-induced myopathy and probably the most commo…	muscle	(hsa00230)Purine metabolism; (hsa01100)Metabolic pathways	antibody: Moderate to strong cytoplasmic positivity with a granular pattern was observed in most normal tissues. Strong staining was for example observed in intestinal glands, exocrine pancreas and skeletal muscle. Keratinized squamous epithelia, renal glomeruli and smooth muscle were negative. ; Cytoplasmic expression in in skeletal muscle.	Distribution: Detected in some; Specificity: Group enriched	chr1:114695546-114673098	ENZYME proteins:Hydrolases; Human disease related genes:Congenital disorders of metabolism:Congenital disorders of nucleotide metabolism; Disease related genes; Potential drug targets; Enzymes; Predicted intracellular proteins		[GO:0003674] molecular_function; [GO:0016810] hydrolase activity, acting on carbon-nitrogen (but not peptide) bonds; [GO:0008150] biological_process; [GO:0009058] biosynthetic process; [GO:0044281] small molecule metabolic process; [GO:0034641] cellular nitrogen compound metabolic process; [GO:0043167] ion binding; [GO:0005575] cellular_component; [GO:0005622] intracellular anatomical structure; …	HP:0003750:Increased muscle fatiguability; HP:0009020:Exercise-induced muscle fatigue; HP:0003738:Exercise-induced myalgia; HP:0003738:Exercise-induced myalgia; HP:0003201:Rhabdomyolysis; HP:0003690:Limb muscle weakness; HP:0003394:Muscle spasm; HP:0001284:Areflexia; HP:0003198:Myopathy; HP:0003202:Skeletal muscle atrophy; HP:0001324:Muscle weakness; HP:0001324:Muscle weakness; HP:0001252:Hypoton…	MYOPATHY DUE TO MYOADENYLATE DEAMINASE DEFICIENCY; Adenosine monophosphate deaminase deficiency; Muscle AMP deaminase deficiency; Increased muscle fatiguability; Ventilatory Threshold; Partial lipodystrophy; Neurogenic Muscular Atrophy; Mandibuloacral dysostosis; Exercise-induced muscle fatigue; Metabolic myopathy; Glycogen Storage Disease Type V; Rhabdomyolysis; Exercise-induced myalgia; Multipl…		AMPD1	0	0	0	0	0	0	0	0	0	0	1	0	0	0	0	0
271	AMPD2	0	1	1	0	0	1	0	0	0	1	4	5	0		AMPD2	adenosine monophosphate deaminase 2	GO:0032264 IMP salvage;GO:0106380 purine ribonucleotide salvage;GO:0032261 purine nucleotide salvage	GO:0005829 cytosol;GO:0005737 cytoplasm;GO:0005622 intracellular anatomical structure	GO:0003876 AMP deaminase activity;GO:0047623 adenosine-phosphate deaminase activity;GO:0019239 deaminase activity	The protein encoded by this gene is important in purine metabolism by converting AMP to IMP. The encoded protein, which acts as a homotetramer, is one of three AMP deaminases found in mammals. Several transcript variants encoding different isoforms have been found for this gene. [provided by RefSeq, Apr 2012]		(hsa00230)Purine metabolism; (hsa01100)Metabolic pathways	antibody: Strong cytoplasmic positivity was displayed in islets of Langerhans. Fallopian tube, gallbladder, subset of renal tubules and subset of cells in seminiferus ducts were moderately stained. Purkinje cells and neuronal cells showed moderate to strong cytoplasmic and/or nuclear staining. Weak to moderate cytoplasmic and membranous staining was observed in stomach and small intestine. Remain…	Distribution: Detected in all; Specificity: Low tissue specificity	chr1:109619837-109632055	Human disease related genes:Congenital malformations:Congenital malformations of the nervous system; Human disease related genes:Nervous system diseases:Other nervous and sensory system diseases; ENZYME proteins:Hydrolases; Disease related genes; Potential drug targets; Enzymes; Predicted intracellular proteins	Cytosol (Enhanced)	[GO:0003674] molecular_function; [GO:0016810] hydrolase activity, acting on carbon-nitrogen (but not peptide) bonds; [GO:0008150] biological_process; [GO:0009058] biosynthetic process; [GO:0044281] small molecule metabolic process; [GO:0034641] cellular nitrogen compound metabolic process; [GO:0043167] ion binding; [GO:0005575] cellular_component; [GO:0005622] intracellular anatomical structure; …	HP:0012407:Scissor gait; HP:0012407:Scissor gait; HP:0000188:Short upper lip; HP:0000297:Facial hypotonia; HP:0002518:Abnormal periventricular white matter morphology; HP:0002518:Abnormal periventricular white matter morphology; HP:0002169:Clonus; HP:0000253:Progressive microcephaly; HP:0000377:Abnormality of the pinna; HP:0001258:Spastic paraplegia; HP:0004325:Decreased body weight; HP:0003477:P…	SPASTIC PARAPLEGIA 63, AUTOSOMAL RECESSIVE; PONTOCEREBELLAR HYPOPLASIA, TYPE 9; STICKLER SYNDROME, TYPE II (disorder); Gait, Scissors; Short upper lip; Glycogen Storage Disease Type V; Adult Undifferentiated Pleomorphic Sarcoma; Childhood Undifferentiated Pleomorphic Sarcoma; Pontoneocerebellar hypoplasia; Congenital pontocerebellar hypoplasia; Facial hypotonia; Abnormality of the periventricular…	DOID:0110814 hereditary spastic paraplegia 63;DOID:0060278 pontocerebellar hypoplasia type 9	AMPD2	0	0	0	0	0	0	0	0	0	0	0	0	0	0	0	0
272	AMPD3	0	0	0	0	0	0	0	0	0	1	1	1	0		AMPD3	adenosine monophosphate deaminase 3	GO:0006196 AMP catabolic process;GO:0032264 IMP salvage;GO:0106380 purine ribonucleotide salvage	GO:1904813 ficolin-1-rich granule lumen;GO:0101002 ficolin-1-rich granule;GO:0034774 secretory granule lumen	GO:0003876 AMP deaminase activity;GO:0047623 adenosine-phosphate deaminase activity;GO:0019239 deaminase activity	This gene encodes a member of the AMP deaminase gene family. The encoded protein is a highly regulated enzyme that catalyzes the hydrolytic deamination of adenosine monophosphate to inosine monophosphate, a branch point in the adenylate catabolic pathway. This gene encodes the erythrocyte (E) isoforms, whereas other family members encode isoforms that predominate in muscle (M) and liver (L) cells…	blood	(hsa00230)Purine metabolism; (hsa01100)Metabolic pathways	Cytoplasmic expression in several tissues.	Distribution: Detected in all; Specificity: Tissue enhanced	chr11:10450388-10507579	ENZYME proteins:Hydrolases; Human disease related genes:Congenital disorders of metabolism:Congenital disorders of nucleotide metabolism; Disease related genes; Potential drug targets; Enzymes; Predicted intracellular proteins	Nuclear membrane (Approved)	[GO:0003674] molecular_function; [GO:0016810] hydrolase activity, acting on carbon-nitrogen (but not peptide) bonds; [GO:0008150] biological_process; [GO:0009058] biosynthetic process; [GO:0044281] small molecule metabolic process; [GO:0034641] cellular nitrogen compound metabolic process; [GO:0043167] ion binding; [GO:0005575] cellular_component; [GO:0005576] extracellular region; [GO:0005622] i…	HP:0009020:Exercise-induced muscle fatigue; HP:0003738:Exercise-induced myalgia; HP:0003690:Limb muscle weakness; HP:0003394:Muscle spasm	Erythrocyte Amp Deaminase Deficiency; Adenosine monophosphate deaminase deficiency; Muscle AMP deaminase deficiency; Glycogen Storage Disease Type VII; Exercise-induced muscle fatigue; Diastolic blood pressure measurement; Exercise-induced myalgia; QRS complex feature; Muscle weakness of limb; Systolic blood pressure measurement; Blood Pressure; Lean body mass; Spasm; Birth Weight; Serum HDL chol…		AMPD3	0	0	0	0	0	0	0	0	0	0	0	0	1	0	0	0
273	AMPH	0	1	0	0	0	0	0	0	1	0	2	4	0		AMPH	amphiphysin	GO:0048488 synaptic vesicle endocytosis;GO:0140238 presynaptic endocytosis;GO:0036465 synaptic vesicle recycling	GO:0030672 synaptic vesicle membrane;GO:0099501 exocytic vesicle membrane;GO:0031256 leading edge membrane	GO:0005543 phospholipid binding;GO:0008289 lipid binding;GO:0005515 protein binding	This gene encodes a protein associated with the cytoplasmic surface of synaptic vesicles. A subset of patients with stiff-man syndrome who were also affected by breast cancer are positive for autoantibodies against this protein. Alternate splicing of this gene results in two transcript variants encoding different isoforms. Additional splice variants have been described, but their full length sequ…		(hsa04666)Fc gamma R-mediated phagocytosis; (hsa04144)Endocytosis	Selective and high expression in CNS and peripheral nerves.; antibody: Selective and strong staining of neuropil in CNS. Distinct cytoplasmic staining in blood vessels, some connective tissues and in a few glandular epithelia of male and female genitalia. Virtually no staining in other tissues.	Distribution: Detected in many; Specificity: Group enriched	chr7:38631497-38383694	Predicted intracellular proteins; Cancer-related genes:Mutational cancer driver genes	Cytosol (Supported); Additional: Plasma membrane	[GO:0003674] molecular_function; [GO:0005575] cellular_component; [GO:0005622] intracellular anatomical structure; [GO:0005737] cytoplasm; [GO:0043226] organelle; [GO:0005856] cytoskeleton; [GO:0031410] cytoplasmic vesicle; [GO:0005886] plasma membrane; [GO:0005829] cytosol; [GO:0008150] biological_process; [GO:0007267] cell-cell signaling; [GO:0006810] transport; [GO:0016192] vesicle-mediated tr…		Aortic Angiosarcoma; Facial Nerve Diseases; Autoimmune Diseases of the Nervous System; Myopathy, Centronuclear, Autosomal Recessive; Autosomal Recessive Centronuclear Myopathy; Congenital Structural Myopathy; Osteofibrous Dysplasia; Limbic Encephalitis; Oropharyngeal candidiasis; Stiff-Person Syndrome; Centronuclear myopathy; Myotonic Dystrophy; Polyneuropathy; Spasm; Encephalitis; Infection caus…		AMPH	0	0	0	0	0	0	0	0	0	0	0	0	0	0	0	0
275	AMT	0	1	0	0	0	0	0	0	1	0	2	2	0		AMT	aminomethyltransferase	GO:0006546 glycine catabolic process;GO:0019464 glycine decarboxylation via glycine cleavage system;GO:0009071 serine family amino acid catabolic process	GO:0005759 mitochondrial matrix;GO:0005739 mitochondrion;GO:0005654 nucleoplasm	GO:0004047 aminomethyltransferase activity;GO:0008483 transaminase activity;GO:0016769 transferase activity, transferring nitrogenous groups	This gene encodes one of four critical components of the glycine cleavage system. Mutations in this gene have been associated with glycine encephalopathy. Multiple transcript variants encoding different isoforms have been found for this gene. [provided by RefSeq, Sep 2011]		(hsa00670)One carbon pool by folate; (hsa00630)Glyoxylate and dicarboxylate metabolism; (hsa00260)Glycine, serine and threonine metabolism	antibody: Moderate to strong cytoplasmic positivity with a granular pattern was observed in most normal tissues. Nuclear immunoreactivity was observed in a few cases. ; Ubiquitous cytoplasmic expression with granular pattern at variable levels.	Distribution: Detected in all; Specificity: Tissue enhanced	chr3:49422473-49416778	Human disease related genes:Congenital disorders of metabolism:Congenital disorders of amino acid metabolism; Disease related genes; Potential drug targets; Enzymes; Predicted intracellular proteins; ENZYME proteins:Transferases	Mitochondria (Supported); Additional: Nucleoplasm	[GO:0003674] molecular_function; [GO:0008168] methyltransferase activity; [GO:0008150] biological_process; [GO:0044281] small molecule metabolic process; [GO:0009056] catabolic process; [GO:0006520] cellular amino acid metabolic process; [GO:0005575] cellular_component; [GO:0005622] intracellular anatomical structure; [GO:0043226] organelle; [GO:0005634] nucleus; [GO:0005654] nucleoplasm; [GO:000…	HP:0100247:Recurrent singultus; HP:0002154:Hyperglycinemia; HP:0003108:Hyperglycinuria; HP:0000711:Restlessness; HP:0100710:Impulsivity; HP:0001522:Death in infancy; HP:0001298:Encephalopathy; HP:0000752:Hyperactivity; HP:0000718:Aggressive behavior; HP:0001254:Lethargy; HP:0000737:Irritability; HP:0001336:Myoclonus; HP:0001274:Agenesis of corpus callosum; HP:0001265:Hyporeflexia; HP:0001347:Hype…	Hyperglycinemia, Nonketotic, Type I; Hyperglycinemia, Nonketotic, Type II; Hyperglycinemia, Nonketotic, Type III; Recurrent singultus; Chromosome 9, partial trisomy 9p; CHROMOSOME 9p DELETION SYNDROME; Early myoclonic encephalopathy; HYPERGLYCINURIA (disorder); Hyperglycinemia; Nonketotic Hyperglycinemia; Psychomotor Agitation; Acidosis; Corneal Ulcer; Hyperlipoproteinemia Type I; Malignant Femal…	DOID:9268 glycine encephalopathy	AMT	0	0	0	0	0	0	0	0	0	0	0	0	0	0	0	0
277	AMY1B	0	0	0	0	1	0	0	0	0	0	1	2	0		AMY1B	amylase alpha 1B	GO:0009311 oligosaccharide metabolic process;GO:0005975 carbohydrate metabolic process;GO:0044238 primary metabolic process	GO:0070062 extracellular exosome;GO:1903561 extracellular vesicle;GO:0043230 extracellular organelle	GO:0004556 alpha-amylase activity;GO:0016160 amylase activity;GO:0103025 alpha-amylase activity (releasing maltohexaose)	Amylases are secreted proteins that hydrolyze 1,4-alpha-glucoside bonds in oligosaccharides and polysaccharides, and thus catalyze the first step in digestion of dietary starch and glycogen. The human genome has a cluster of several amylase genes that are expressed at high levels in either salivary gland or pancreas. This gene encodes an amylase isoenzyme produced by the salivary gland. [provided…	pancreas	(hsa00500)Starch and sucrose metabolism; (hsa04973)Carbohydrate digestion and absorption; (hsa04970)Salivary secretion	Selective cytoplasmic expression in salivary gland and pancreatic exocrine glandular cells.; antibody: Strong cytoplasmic positivity was observed in exocrine pancreas and salivary gland. Remaining normal tissues were negative.	Distribution: Detected in some; Specificity: Tissue enriched	chr1:103696453-103687415	Predicted secreted proteins		[GO:0008150] biological_process; [GO:0005975] carbohydrate metabolic process; [GO:0003674] molecular_function; [GO:0043167] ion binding; [GO:0016798] hydrolase activity, acting on glycosyl bonds; [GO:0005575] cellular_component; [GO:0005576] extracellular region; [GO:0005615] extracellular space; [GO:0043226] organelle		Hypervigilance; Restlessness; Urinary incontinence of non-organic origin; Emotional abuse; Pain in children; Hyperamylasemia; Negative affectivity; Bedwetting; Enuresis; Meconium Aspiration Syndrome; Anxiety state; McCune-Albright Syndrome; social stress; Macrophage Activation Syndrome; Seasonal Affective Disorder; Anxiety neurosis (finding); Temporomandibular Joint Disorders; Generalized Anxiety…		AMY1B	0	0	0	0	0	0	0	0	0	0	0	0	0	0	0	0
280	AMY2B	0	0	0	0	1	0	0	1	0	0	2	2	0		AMY2B	amylase alpha 2B	GO:0005975 carbohydrate metabolic process;GO:0044238 primary metabolic process;GO:0071704 organic substance metabolic process	GO:0070062 extracellular exosome;GO:1903561 extracellular vesicle;GO:0043230 extracellular organelle	GO:0004556 alpha-amylase activity;GO:0016160 amylase activity;GO:0103025 alpha-amylase activity (releasing maltohexaose)	Amylases are secreted proteins that hydrolyze 1,4-alpha-glucoside bonds in oligosaccharides and polysaccharides, and thus catalyze the first step in digestion of dietary starch and glycogen. The human genome has a cluster of several amylase genes that are expressed at high levels in either salivary gland or pancreas. This gene encodes an amylase isoenzyme produced by the pancreas. [provided by Re…	uterus	(hsa00500)Starch and sucrose metabolism; (hsa04973)Carbohydrate digestion and absorption; (hsa04970)Salivary secretion	Selective cytoplasmic expression in pancreatic exocrine glandular cells and salivary gland.; antibody: Strong cytoplasmic positivity was observed in exocrine pancreas and salivary gland. Remaining normal tissues were negative.	Distribution: Detected in all; Specificity: Tissue enriched	chr1:103554644-103579534	Enzymes; ENZYME proteins:Hydrolases; Predicted secreted proteins		[GO:0003674] molecular_function; [GO:0043167] ion binding; [GO:0005575] cellular_component; [GO:0005576] extracellular region; [GO:0008150] biological_process; [GO:0005975] carbohydrate metabolic process; [GO:0016798] hydrolase activity, acting on glycosyl bonds; [GO:0043226] organelle; [GO:0005615] extracellular space		Hyperamylasemia; Congenital ichthyosis; Autosomal dominant retinitis pigmentosa; Carcinoid tumor no ICD-O subtype; Ichthyoses; Carcinoid Tumor; Blood Protein Measurement; Obesity; Malignant neoplasm of lung		AMY2B	0	0	0	0	0	0	0	0	0	0	0	0	0	0	0	0
283	ANG	0	0	0	0	0	0	0	1	0	1	2	2	0		ANG	angiogenin	GO:0032431 activation of phospholipase A2 activity;GO:0032430 positive regulation of phospholipase A2 activity;GO:0006651 diacylglycerol biosynthetic process	GO:0032311 angiogenin-PRI complex;GO:0005604 basement membrane;GO:0030426 growth cone	GO:0005507 copper ion binding;GO:0019843 rRNA binding;GO:0004521 endoribonuclease activity	The protein encoded by this gene is a member of the RNase A superfamily though it has relatively weak ribonucleolytic activity. This protein is a potent mediator of new blood vessel formation and thus, in addition to the name RNase5, is commonly called angiogenin. This protein induces angiogenesis after binding to actin on the surface of endothelial cells. This protein also accumulates at the nuc…	liver	(hsa05014)Amyotrophic lateral sclerosis		Distribution: Detected in all; Specificity: Tissue enriched	chr14:20684177-20694186	Predicted secreted proteins; Human disease related genes:Nervous system diseases:Neurodegenerative diseases; Disease related genes; Cancer-related genes:Candidate cancer biomarkers	Mitotic chromosome;Nucleoli;Nucleoli rim (Approved); Additional: Actin filaments	[GO:0003674] molecular_function; [GO:0008150] biological_process; [GO:0034641] cellular nitrogen compound metabolic process; [GO:0005575] cellular_component; [GO:0005622] intracellular anatomical structure; [GO:0043226] organelle; [GO:0005634] nucleus; [GO:0005730] nucleolus; [GO:0008092] cytoskeletal protein binding; [GO:0003677] DNA binding; [GO:0005576] extracellular region; [GO:0009058] biosy…	HP:0030195:Fatigable weakness of swallowing muscles; HP:0025425:Laryngospasm; HP:0003470:Paralysis; HP:0000217:Xerostomia; HP:0030196:Fatigable weakness of respiratory muscles; HP:0002180:Neurodegeneration; HP:0012531:Pain; HP:0007354:Amyotrophic lateral sclerosis; HP:0007354:Amyotrophic lateral sclerosis; HP:0000713:Agitation; HP:0002094:Dyspnea; HP:0003324:Generalized muscle weakness; HP:000369…	Erythrodermic mycosis fungoides; Obstructive chronic pancreatitis; Amyotrophic Lateral Sclerosis 9; chromosome 11q duplication syndrome; Astrocytoma of brain; Choroidal neovascular membrane (disorder); Proneural Glioblastoma; Choroidal retinal neovascularization; Chronic kidney disease stage 2; Proctitis; Lateral Sclerosis; Rickettsia Infections; Acute-Phase Reaction; Hemangioendothelioma; inflam…	DOID:0060200 amyotrophic lateral sclerosis type 9	ANG	0	0	0	0	0	0	0	0	0	0	0	0	0	0	0	0
285	ANGPT2	0	1	0	0	0	0	0	0	1	0	2	3	0		ANGPT2	angiopoietin 2	GO:0050928 negative regulation of positive chemotaxis;GO:0048014 Tie signaling pathway;GO:0072012 glomerulus vasculature development	GO:0062023 collagen-containing extracellular matrix;GO:0031012 extracellular matrix;GO:0030312 external encapsulating structure	GO:0030971 receptor tyrosine kinase binding;GO:1990782 protein tyrosine kinase binding;GO:0019901 protein kinase binding	This gene belongs to the angiopoietin family of growth factors. The protein encoded by this gene is an antagonist of angiopoietin 1, and both angiopoietin 1 and angiopoietin 2 are ligands for the endothelial TEK receptor tyrosine kinase. Angiopoietin 2 is upregulated in multiple inflammatory diseases and is implicated in the direct control of inflammation-related signaling pathways. The encoded p…		(hsa04066)HIF-1 signaling pathway; (hsa05167)Kaposi sarcoma-associated herpesvirus infection; (hsa04015)Rap1 signaling pathway	antibody: Strong cytoplasmic staining was observed in hepatocytes, placenta, seminal vesicle and neuronal cells in CNS. Gastrointestinal tract, exocrine pancreas, renal tubules, urothelia, lung and respiratory epithelia were moderately stained. Endothelial cells and erythrocytes were distinctly positive. Remaining tissues were in general negative.; Cytoplasmic expression in several tissues. Addit…	Distribution: Detected in many; Specificity: Tissue enhanced	chr8:6563245-6499632	RAS pathway related proteins; Predicted secreted proteins; Cancer-related genes:Candidate cancer biomarkers		[GO:0003674] molecular_function; [GO:0019899] enzyme binding; [GO:0043167] ion binding; [GO:0005575] cellular_component; [GO:0005576] extracellular region; [GO:0005615] extracellular space; [GO:0008150] biological_process; [GO:0030154] cell differentiation; [GO:0048856] anatomical structure development; [GO:0048646] anatomical structure formation involved in morphogenesis; [GO:0007165] signal tra…	HP:0000034:Hydrocele testis; HP:0001004:Lymphedema; HP:0003593:Infantile onset; HP:0000006:Autosomal dominant inheritance	Corneal thickening; Recurrent Adult Hepatocellular Carcinoma; Recurrent Childhood Hepatocellular Carcinoma; Acute coagulopathy; Kaposi's sarcoma of palate; Telangiectatic focal nodular hyperplasia; Hypertensive cardiomyopathy; Impotence, Vasculogenic; Gastrointestinal vascular malformation; Skin flap necrosis; Uremic encephalopathy; High Risk Acute Myeloid Leukemia; Kasabach-Merritt syndrome; Aut…		ANGPT2	0	0	0	0	0	0	0	0	0	0	0	0	0	0	0	0
286	ANK1	1	0	1	0	0	0	0	1	1	0	4	6	0		ANK1	ankyrin 1	GO:0035090 maintenance of apical/basal cell polarity;GO:0045199 maintenance of epithelial cell apical/basal polarity;GO:0030011 maintenance of cell polarity	GO:0014731 spectrin-associated cytoskeleton;GO:0031430 M band;GO:0031672 A band	GO:0008093 cytoskeletal anchor activity;GO:0030507 spectrin binding;GO:0051117 ATPase binding	Ankyrins are a family of proteins that link the integral membrane proteins to the underlying spectrin-actin cytoskeleton and play key roles in activities such as cell motility, activation, proliferation, contact and the maintenance of specialized membrane domains. Multiple isoforms of ankyrin with different affinities for various target proteins are expressed in a tissue-specific, developmentally…	blood;spleen	(hsa05205)Proteoglycans in cancer	antibody: Red blood cells and subsets of cells in bone marrow showed strong immunoreactivity. The intestine, salivary gland, exocrine pancreas, seminiferus duct cells, seminal vesicle, ciliated cells and skeletal muscle showed moderate membranous staining. Membranes of purkinje cells showed moderate poitivity. Remaining normal cells were in general weakly stained or negative.; Selective membranou…	Distribution: Detected in many; Specificity: Group enriched	chr8:41896741-41653225	Transporters:Accessory Factors Involved in Transport; Human disease related genes:Cardiovascular diseases:Hematologic diseases; Disease related genes; Potential drug targets; Predicted intracellular proteins		[GO:0003674] molecular_function; [GO:0008150] biological_process; [GO:0007165] signal transduction; [GO:0005575] cellular_component; [GO:0005622] intracellular anatomical structure; [GO:0005737] cytoplasm; [GO:0005886] plasma membrane; [GO:0006810] transport; [GO:0016192] vesicle-mediated transport; [GO:0043226] organelle; [GO:0005856] cytoskeleton; [GO:0007010] cytoskeleton organization; [GO:000…	HP:0005525:Spontaneous hemolytic crises; HP:0004444:Spherocytosis; HP:0004444:Spherocytosis; HP:0004444:Spherocytosis; HP:0005815:Supernumerary ribs; HP:0025548:Increased mean corpuscular hemoglobin concentration; HP:0040186:Maculopapular exanthema; HP:0025143:Chills; HP:0001723:Restrictive cardiomyopathy; HP:0100724:Hypercoagulability; HP:0001978:Extramedullary hematopoiesis; HP:0005502:Increase…	8p11.2 deletion syndrome; SPHEROCYTOSIS, TYPE 1, AUTOSOMAL RECESSIVE; Jaundice, Hemolytic; Schwartz-Lelek syndrome; Anemia, hereditary spherocytic hemolytic; Calcium Pyrophosphate Dihydrate Deposition; Calcium pyrophosphate arthropathy; Spherocytosis; Ankle brachial pressure index (observable entity); DEAFNESS-HYPOGONADISM SYNDROME; Spontaneous hemolytic crises; Increased red cell osmotic fragili…	DOID:0110916 hereditary spherocytosis type 1	ANK1	0	0	0	0	0	0	0	0	0	0	0	0	0	0	0	0
287	ANK2	0	1	1	0	0	0	1	1	1	1	6	15	0		ANK2	ankyrin 2	GO:0036309 protein localization to M-band;GO:0036371 protein localization to T-tubule;GO:0098907 regulation of SA node cell action potential	GO:0043034 costamere;GO:0031430 M band;GO:0031672 A band	GO:0140031 phosphorylation-dependent protein binding;GO:0008093 cytoskeletal anchor activity;GO:0030507 spectrin binding	This gene encodes a member of the ankyrin family of proteins that link the integral membrane proteins to the underlying spectrin-actin cytoskeleton. Ankyrins play key roles in activities such as cell motility, activation, proliferation, contact and the maintenance of specialized membrane domains. Most ankyrins are typically composed of three structural domains: an amino-terminal domain containing…		(hsa05205)Proteoglycans in cancer	antibody: Neuronal cells, peripheral nerves and neuropil displayed distinct cytoplasmic positivity. A subset of glial cells showed distinct nuclear staining. Remaining normal tissues were generally negative.; Cytoplasmic and membranous expression in several tissues. High abundance in the brain, peripheral nerves, renal collecting ducts and the adrenal gland.	Distribution: Detected in many; Specificity: Tissue enhanced	chr4:112705622-113383736	Transporters:Accessory Factors Involved in Transport; Human disease related genes:Cardiovascular diseases:Cardiac diseases; Disease related genes; Potential drug targets; Predicted intracellular proteins	Plasma membrane (Supported)	[GO:0003674] molecular_function; [GO:0008150] biological_process; [GO:0007165] signal transduction; [GO:0005575] cellular_component; [GO:0005622] intracellular anatomical structure; [GO:0043226] organelle; [GO:0005856] cytoskeleton; [GO:0005737] cytoplasm; [GO:0006810] transport; [GO:0015031] protein transport; [GO:0005886] plasma membrane; [GO:0031410] cytoplasmic vesicle; [GO:0005768] endosome;…	HP:0500018:Abnormal cardiac exercise stress test; HP:0001197:Abnormality of prenatal development or birth; HP:0001688:Sinus bradycardia; HP:0001688:Sinus bradycardia; HP:0005135:Abnormal T-wave; HP:0005184:Prolonged QTc interval; HP:0001664:Torsade de pointes; HP:0001657:Prolonged QT interval; HP:0005110:Atrial fibrillation; HP:0002900:Hypokalemia; HP:0012332:Abnormal autonomic nervous system phy…	CARDIAC ARRHYTHMIA, ANKYRIN-B-RELATED; Long Qt Syndrome 4; Premature Cardiac Complex; psychiatric hospitalization; Parkinson Disease 6, Autosomal Recessive Early-Onset; Abnormal cardiac exercise stress test; Electrocardiogram change; Abnormal T-wave; Sinus Bradycardia, CTCAE; continuous electrocardiogram sinus bradycardia (finding); Romano-Ward Syndrome; Sinus bradycardia; Abnormality of prenatal…	DOID:0111700 ankyrin-B-related cardiac arrhythmia	ANK2	0	0	0	1	0	0	0	0	0	0	0	0	0	0	0	0
288	ANK3	0	0	0	0	0	0	0	0	0	1	1	1	0		ANK3	ankyrin 3	GO:1900827 positive regulation of membrane depolarization during cardiac muscle cell action potential;GO:0072658 maintenance of protein location in membrane;GO:0072660 maintenance of protein location in plasma membrane	GO:0014731 spectrin-associated cytoskeleton;GO:0033268 node of Ranvier;GO:0043034 costamere	GO:0008093 cytoskeletal anchor activity;GO:0030507 spectrin binding;GO:0005200 structural constituent of cytoskeleton	Ankyrins are a family of proteins that are believed to link the integral membrane proteins to the underlying spectrin-actin cytoskeleton and play key roles in activities such as cell motility, activation, proliferation, contact, and the maintenance of specialized membrane domains. Multiple isoforms of ankyrin with different affinities for various target proteins are expressed in a tissue-specific…		(hsa05205)Proteoglycans in cancer	antibody: Normal tissues displayed moderate to strong cytoplasmic and membranous positivity. Myocytes, skin, liver and lymphoid cells were negative.; Membranous expression in several tissues.	Distribution: Detected in many; Specificity: Low tissue specificity	chr10:60733528-60026298	Predicted intracellular proteins; Human disease related genes:Other diseases:Mental and behavioural disorders; Cancer-related genes:Mutated cancer genes; Disease related genes	Plasma membrane (Supported)	[GO:0003674] molecular_function; [GO:0008150] biological_process; [GO:0007165] signal transduction; [GO:0005575] cellular_component; [GO:0005622] intracellular anatomical structure; [GO:0005737] cytoplasm; [GO:0005886] plasma membrane; [GO:0043226] organelle; [GO:0005794] Golgi apparatus; [GO:0005856] cytoskeleton; [GO:0005773] vacuole; [GO:0005764] lysosome; [GO:0007010] cytoskeleton organizatio…	HP:0003763:Bruxism; HP:0003763:Bruxism; HP:0001520:Large for gestational age; HP:0000752:Hyperactivity; HP:0000752:Hyperactivity; HP:0000718:Aggressive behavior; HP:0000718:Aggressive behavior; HP:0002342:Intellectual disability, moderate; HP:0002342:Intellectual disability, moderate; HP:0000729:Autistic behavior; HP:0001256:Intellectual disability, mild; HP:0000256:Macrocephaly; HP:0000750:Delay…	MENTAL RETARDATION, AUTOSOMAL RECESSIVE 37; Acute transient psychotic disorder; Cyclothymic Disorder; Alcohol Related Neurodevelopmental Disorder; Partial Fetal Alcohol Syndrome; Alcohol Related Birth Defect; USHER SYNDROME, TYPE ID; Neuroma; Microdeletion syndromes; Bruxism; AMYOTROPHIC LATERAL SCLEROSIS 6 (disorder); AMYOTROPHIC LATERAL SCLEROSIS 1, AUTOSOMAL RECESSIVE; Depressed bipolar I diso…	DOID:0060308 autosomal recessive non-syndromic intellectual disability	ANK3	1	0	0	0	0	0	0	0	0	0	0	0	0	0	0	0
290	ANPEP	1	1	1	1	0	0	0	1	1	1	7	21	0		ANPEP	alanyl aminopeptidase, membrane	GO:0043171 peptide catabolic process;GO:0046718 viral entry into host cell;GO:0044409 entry into host	GO:0005793 endoplasmic reticulum-Golgi intermediate compartment;GO:0030667 secretory granule membrane;GO:0005765 lysosomal membrane	GO:0070006 metalloaminopeptidase activity;GO:0004177 aminopeptidase activity;GO:0008235 metalloexopeptidase activity	Aminopeptidase N is located in the small-intestinal and renal microvillar membrane, and also in other plasma membranes. In the small intestine aminopeptidase N plays a role in the final digestion of peptides generated from hydrolysis of proteins by gastric and pancreatic proteases. Its function in proximal tubular epithelial cells and other cell types is less clear. The large extracellular carbox…		(hsa04614)Renin-angiotensin system; (hsa00480)Glutathione metabolism; (hsa04640)Hematopoietic cell lineage	Membranous and cytoplasmic expression in renal tubules, intestine, exocrine pancreas, prostate, liver and gallbladder.; antibody: Strong luminal membranous staining was observed in the intestine, hepatocellular canaliculi, gall bladder, pancreatic acini, renal tubules and prostate. The remaining normal cells were in general negative.	Distribution: Detected in many; Specificity: Group enriched	chr15:89814852-89784895	Enzymes; ENZYME proteins:Hydrolases; CD markers; Peptidases:Metallopeptidases	Plasma membrane (Supported)	[GO:0003674] molecular_function; [GO:0043167] ion binding; [GO:0008150] biological_process; [GO:0008233] peptidase activity; [GO:0005575] cellular_component; [GO:0005886] plasma membrane; [GO:0005622] intracellular anatomical structure; [GO:0005737] cytoplasm; [GO:0043226] organelle; [GO:0005773] vacuole; [GO:0005764] lysosome; [GO:0005576] extracellular region; [GO:0005615] extracellular space; …		Hypocarnitinaemia; Nasal infection; Sucrase-isomaltase deficiency, congenital; ACUTE ALCOHOL WITHDRAWAL; Chromosome 8, monosomy 8p; Mucosal erosion; Dystonia with Cerebellar Atrophy; Mature T ALL; Parapsoriasis; Differentiation syndrome due to and following chemotherapy co-occurrent with acute promyelocytic leukemia; Placental abnormalities (excl neoplasms); Infant Acute Undifferentiated Leukemia…		ANPEP	0	0	0	0	1	0	0	0	0	0	0	0	0	0	0	0
291	SLC25A4	0	0	1	0	0	0	0	0	0	1	2	2	0		SLC25A4	solute carrier family 25 member 4	GO:0015853 adenine transport;GO:0140021 mitochondrial ADP transmembrane transport;GO:1990544 mitochondrial ATP transmembrane transport	GO:0005757 mitochondrial permeability transition pore complex;GO:0046930 pore complex;GO:0032592 integral component of mitochondrial membrane	GO:0015207 adenine transmembrane transporter activity;GO:0005471 ATP:ADP antiporter activity;GO:0017077 oxidative phosphorylation uncoupler activity	This gene is a member of the mitochondrial carrier subfamily of solute carrier protein genes. The product of this gene functions as a gated pore that translocates ADP from the cytoplasm into the mitochondrial matrix and ATP from the mitochondrial matrix into the cytoplasm. The protein forms a homodimer embedded in the inner mitochondria membrane. Mutations in this gene have been shown to result i…		(hsa05017)Spinocerebellar ataxia; (hsa04218)Cellular senescence; (hsa04217)Necroptosis	Granular cytoplasmic expression in several tissues, highly abundant in heart, parathyroid gland and gastrointestinal tract.	Distribution: Detected in many; Specificity: Group enriched	chr4:185143266-185150382	FDA approved drug targets:Small molecule drugs; Human disease related genes:Nervous system diseases:Eye disease; Disease related genes; Transporters:Electrochemical Potential-driven transporters; Human disease related genes:Congenital disorders of metabolism:Mitochondrial diseases	Mitochondria (Supported)	[GO:0008150] biological_process; [GO:0006810] transport; [GO:0055085] transmembrane transport; [GO:0005575] cellular_component; [GO:0005622] intracellular anatomical structure; [GO:0005737] cytoplasm; [GO:0043226] organelle; [GO:0005739] mitochondrion; [GO:0022857] transmembrane transporter activity; [GO:0003674] molecular_function; [GO:0008219] cell death; [GO:0007005] mitochondrion organization…	HP:0000017:Nocturia; HP:0003689:Multiple mitochondrial DNA deletions; HP:0003548:Subsarcolemmal accumulations of abnormally shaped mitochondria; HP:0007042:Focal white matter lesions; HP:0012103:Abnormality of the mitochondrion; HP:0003731:Quadriceps muscle weakness; HP:0012664:Reduced ejection fraction; HP:0001992:Organic aciduria; HP:0004308:Ventricular arrhythmia; HP:0001946:Ketosis; HP:000343…	MITOCHONDRIAL DNA DEPLETION SYNDROME 12A (CARDIOMYOPATHIC TYPE), AUTOSOMAL DOMINANT; MITOCHONDRIAL DNA DEPLETION SYNDROME 12B (CARDIOMYOPATHIC TYPE), AUTOSOMAL RECESSIVE; Mitochondrial DNA Depletion Syndrome 12; Progressive External Ophthalmoplegia with Mitochondrial DNA Deletions, Autosomal Dominant, 2; Progeroid Syndrome, Congenital, Petty Type; Progressive External Ophthalmoplegia with Mitocho…	DOID:0111517 autosomal dominant progressive external ophthalmoplegia with mitochondrial DNA deletions 2;DOID:0080130 mitochondrial DNA depletion syndrome 12a;DOID:0080335 mitochondrial DNA depletion syndrome 12b	SLC25A4	0	0	0	0	0	0	0	0	0	0	0	0	0	0	0	0
301	ANXA1	0	0	1	0	0	0	0	0	0	0	1	1	0		ANXA1	annexin A1	GO:0014839 myoblast migration involved in skeletal muscle regeneration;GO:0033031 positive regulation of neutrophil apoptotic process;GO:0045629 negative regulation of T-helper 2 cell differentiation	GO:0031232 extrinsic component of external side of plasma membrane;GO:0031313 extrinsic component of endosome membrane;GO:0001891 phagocytic cup	GO:0019834 phospholipase A2 inhibitor activity;GO:0004859 phospholipase inhibitor activity;GO:0055102 lipase inhibitor activity	This gene encodes a membrane-localized protein that binds phospholipids. This protein inhibits phospholipase A2 and has anti-inflammatory activity. Loss of function or expression of this gene has been detected in multiple tumors. [provided by RefSeq, Dec 2014]			antibody: Moderate to strong cytoplasmic positivity, in a few cases combined with membranous staining, was observed in salivary glands, lung, female genitalia, prostate, squamous and respiratory epithelia along with subsets of cells in lymphoid tissues. Cilia in respiratory epithelia and fallopian tube were distinctly stained. Remaining normal tissues were in general negative.; Cytoplasmic, membr…	Distribution: Detected in all; Specificity: Tissue enhanced	chr9:73151865-73170393	FDA approved drug targets:Small molecule drugs; Cancer-related genes:Candidate cancer biomarkers; Predicted secreted proteins; Transporters:Transporter channels and pores; Predicted intracellular proteins	Cytosol;Plasma membrane (Supported); Additional: Nucleoplasm	[GO:0003674] molecular_function; [GO:0043167] ion binding; [GO:0008289] lipid binding; [GO:0005575] cellular_component; [GO:0005622] intracellular anatomical structure; [GO:0005737] cytoplasm; [GO:0043226] organelle; [GO:0005634] nucleus; [GO:0008150] biological_process; [GO:0008219] cell death; [GO:0005654] nucleoplasm; [GO:0005829] cytosol; [GO:0005886] plasma membrane; [GO:0005929] cilium; [GO…		Malignant neoplasm of body of stomach; Malignant tumor of greater curve of stomach; Malignant tumor of lesser curve of stomach; MUSCULAR DYSTROPHY, LIMB-GIRDLE, TYPE 1C; Transitional Cell Neoplasm; Lesion of stomach; Urinary Bladder Calculi (disorder); Exacerbation of idiopathic pulmonary fibrosis; Adult Oligodendroglial Tumor; Cerebral arterial thrombosis; FOCAL CORTICAL DYSPLASIA OF TAYLOR; Oli…		ANXA1	0	0	0	0	0	0	0	0	0	0	0	0	0	0	0	0
302	ANXA2	0	0	0	0	0	0	0	0	0	1	1	1	0		ANXA2	annexin A2	GO:1905597 positive regulation of low-density lipoprotein particle receptor binding;GO:0032804 negative regulation of low-density lipoprotein particle receptor catabolic process;GO:1905602 positive regulation of receptor-mediated endocytosis involved in cholesterol transport	GO:1990665 AnxA2-p11 complex;GO:1990667 PCSK9-AnxA2 complex;GO:0035578 azurophil granule lumen	GO:0019834 phospholipase A2 inhibitor activity;GO:0046790 virion binding;GO:0004859 phospholipase inhibitor activity	This gene encodes a member of the annexin family. Members of this calcium-dependent phospholipid-binding protein family play a role in the regulation of cellular growth and in signal transduction pathways. This protein functions as an autocrine factor which heightens osteoclast formation and bone resorption. This gene has three pseudogenes located on chromosomes 4, 9 and 10, respectively. Multipl…	bladder	(hsa05132)Salmonella infection	antibody: Most normal cells showed moderate to strong cytoplasmic positivity. Most cells in CNS were negative except ependymal cells.; Ubiquitous membranous and extracellular expression.	Distribution: Detected in all; Specificity: Tissue enhanced	chr15:60398025-60347151	FDA approved drug targets:Small molecule drugs; Cancer-related genes:Candidate cancer biomarkers; Predicted secreted proteins; Transporters:Transporter channels and pores; Predicted intracellular proteins	Plasma membrane (Approved); Additional: Cytosol	[GO:0003674] molecular_function; [GO:0043167] ion binding; [GO:0008092] cytoskeletal protein binding; [GO:0008289] lipid binding; [GO:0003723] RNA binding; [GO:0005575] cellular_component; [GO:0005622] intracellular anatomical structure; [GO:0043226] organelle; [GO:0005634] nucleus; [GO:0005737] cytoplasm; [GO:0008150] biological_process; [GO:0031410] cytoplasmic vesicle; [GO:0005768] endosome; […		Hysteromyoma; Acute urinary tract infection; Keratoconus posticus circumscriptus; Pancreatic Intraepithelial Neoplasia-1; Thrombotic stroke; Vagina Carcinoma; Hyperfibrinolysis; Malignant myoepithelioma; Mesenchymal Glioblastoma; Bone necrosis; Bare Lymphocyte Syndrome; Bare lymphocyte syndrome 2; Hepatopulmonary Syndrome; Disease of mucous membrane; Dysferlinopathy; Hemorrhagic Disorders; Squamo…		ANXA2	0	0	0	0	0	0	0	0	0	0	0	0	0	0	0	0
306	ANXA3	0	0	1	0	0	0	0	0	1	0	2	2	0		ANXA3	annexin A3	GO:0043312 neutrophil degranulation;GO:0002283 neutrophil activation involved in immune response;GO:0002446 neutrophil mediated immunity	GO:0030670 phagocytic vesicle membrane;GO:0045335 phagocytic vesicle;GO:0042581 specific granule	GO:0019834 phospholipase A2 inhibitor activity;GO:0004859 phospholipase inhibitor activity;GO:0055102 lipase inhibitor activity	This gene encodes a member of the annexin family. Members of this calcium-dependent phospholipid-binding protein family play a role in the regulation of cellular growth and in signal transduction pathways. This protein functions in the inhibition of phopholipase A2 and cleavage of inositol 1,2-cyclic phosphate to form inositol 1-phosphate. This protein may also play a role in anti-coagulation. [p…	bone_marrow		Cytoplasmic expression at variable levels in most tissues.; antibody: A majority of tissues showed weak to moderate cytoplasmic staining. Strong cytoplasmic and to a lesser extent nuclear positivity was observed in stomach, distal renal tubules, seminal vesicle, prostate, bone marrow hematopoietic cells, pancreatic and bile ducts. Pneumocytes showed strong membranous staining. Squamous epithelia,…	Distribution: Detected in all; Specificity: Tissue enhanced	chr4:78551761-78610447	FDA approved drug targets:Small molecule drugs; Predicted intracellular proteins	Plasma membrane (Supported)	[GO:0003674] molecular_function; [GO:0043167] ion binding; [GO:0008289] lipid binding; [GO:0008150] biological_process; [GO:0005575] cellular_component; [GO:0005622] intracellular anatomical structure; [GO:0005737] cytoplasm; [GO:0005886] plasma membrane; [GO:0031410] cytoplasmic vesicle; [GO:0043226] organelle; [GO:0006950] response to stress; [GO:0002376] immune system process; [GO:0006810] tra…		Equinus Deformity; Libman-Sacks Disease; Carcinoma in situ of uterine cervix; Bone neoplasms; Luminal A Breast Carcinoma; Hyperalgesia, Thermal; Promyelocytic leukemia; Intracranial Aneurysm; Adult Fibrosarcoma; Fibrosarcoma; Human papilloma virus infection; Acute pancreatitis; Hyperalgesia; Lymphatic Metastasis; Tumor Initiation; Graves Disease; Acute Promyelocytic Leukemia; Recurrent tumor; Acu…		ANXA3	0	0	0	0	0	0	0	0	0	0	0	0	0	0	0	0
311	ANXA11	0	0	0	0	0	0	0	0	1	0	1	1	0		ANXA11	annexin A11	GO:0032506 cytokinetic process;GO:0000910 cytokinesis;GO:0051592 response to calcium ion	GO:0042470 melanosome;GO:0048770 pigment granule;GO:0045335 phagocytic vesicle	GO:0008429 phosphatidylethanolamine binding;GO:0044548 S100 protein binding;GO:0023026 MHC class II protein complex binding	This gene encodes a member of the annexin family, a group of calcium-dependent phospholipid-binding proteins. Annexins have unique N-terminal domains and conserved C-terminal domains, which contain calcium-dependent phospholipid-binding sites. The encoded protein is a 56-kD antigen recognized by sera from patients with various autoimmune diseases. Several transcript variants encoding two differen…		(hsa05014)Amyotrophic lateral sclerosis	antibody: Most normal tissues showed moderate to strong cytoplasmic positivity. Additional nuclear staining was observed in several cases. Squamous epithelia, glial cells and smooth muscle were generally weakly stained.; Ubiquitous cytoplasmic expression.	Distribution: Detected in all; Specificity: Low tissue specificity	chr10:80205808-80150889	Cancer-related genes:Candidate cancer biomarkers; Predicted intracellular proteins; Disease related genes; Potential drug targets; Transporters:Primary Active Transporters; Human disease related genes:Nervous system diseases:Neurodegenerative diseases	Nucleoplasm (Supported); Additional: Cytosol	[GO:0003674] molecular_function; [GO:0043167] ion binding; [GO:0008289] lipid binding; [GO:0003723] RNA binding; [GO:0005575] cellular_component; [GO:0005622] intracellular anatomical structure; [GO:0043226] organelle; [GO:0005634] nucleus; [GO:0005737] cytoplasm; [GO:0005654] nucleoplasm; [GO:0005829] cytosol; [GO:0005856] cytoskeleton; [GO:0005635] nuclear envelope; [GO:0008150] biological_proc…	HP:0030195:Fatigable weakness of swallowing muscles; HP:0025425:Laryngospasm; HP:0003470:Paralysis; HP:0000217:Xerostomia; HP:0030196:Fatigable weakness of respiratory muscles; HP:0002180:Neurodegeneration; HP:0012531:Pain; HP:0007354:Amyotrophic lateral sclerosis; HP:0007354:Amyotrophic lateral sclerosis; HP:0000713:Agitation; HP:0002094:Dyspnea; HP:0003324:Generalized muscle weakness; HP:000382…	AMYOTROPHIC LATERAL SCLEROSIS 23; Surfactant protein D measurement; IgG4-Related Sclerosing Disease; Fatigable weakness of swallowing muscles; Laryngospasm; Xerostomia; Fatigable weakness of respiratory muscles; Paralysed; Immunoglobulin G4-Related Disease; Agitation, CTCAE 3.0; Agitation, CTCAE 5.0; Agitation; Generalized Muscle Weakness, CTCAE; CATARACT, ANTERIOR POLAR; Generalized muscle weakn…	DOID:0080225 amyotrophic lateral sclerosis type 23	ANXA11	0	0	0	0	0	0	0	0	0	0	0	0	0	0	0	0
312	ANXA13	0	0	0	0	0	0	0	0	1	0	1	3	0		ANXA13	annexin A13	GO:0030154 cell differentiation;GO:0048869 cellular developmental process;GO:0032502 developmental process	GO:0019898 extrinsic component of membrane;GO:0016324 apical plasma membrane;GO:0045177 apical part of cell	GO:1901611 phosphatidylglycerol binding;GO:0005544 calcium-dependent phospholipid binding;GO:0001786 phosphatidylserine binding	This gene encodes a member of the annexin family. Members of this calcium-dependent phospholipid-binding protein family play a role in the regulation of cellular growth and in signal transduction pathways. The specific function of this gene has not yet been determined; however, it is associated with the plasma membrane of undifferentiated, proliferating endothelial cells and differentiated villus…	colon		Cytoplasmic expression in gastrointestinal tract, bile ducts, gallbladder, renal tubules and fallopian tube.; antibody: Moderate cytoplasmic and/or membranous positivity was observed in gastrointestinal glands, bronchus, bile ducts, renal tubules, ganglion cells, alveolar macrophages and seminal vesicle. Small intestine, duodenum and ciliated cells of fallopian tube were strongly stained. Remaini…	Distribution: Detected in many; Specificity: Tissue enhanced	chr8:123737393-123680794	Predicted intracellular proteins	Plasma membrane (Supported); Additional: Nucleoplasm	[GO:0003674] molecular_function; [GO:0043167] ion binding; [GO:0008289] lipid binding; [GO:0005575] cellular_component; [GO:0005622] intracellular anatomical structure; [GO:0043226] organelle; [GO:0005634] nucleus; [GO:0005654] nucleoplasm; [GO:0005886] plasma membrane; [GO:0005737] cytoplasm; [GO:0031410] cytoplasmic vesicle; [GO:0005576] extracellular region; [GO:0005615] extracellular space; […		Viral gastroenteritis; FRONTOMETAPHYSEAL DYSPLASIA 1; Hot flushes; Fibromuscular Dysplasia; Foot-and-Mouth Disease; Tick-Borne Encephalitis; Muscular Dystrophy, Facioscapulohumeral; Parasitic Diseases; trachomatis; Encephalitis; Carcinoma breast stage IV; Hormone refractory prostate cancer; Influenza; Solid Neoplasm; Hepatitis B; Diabetes Mellitus, Insulin-Dependent; Secondary malignant neoplasm …		ANXA13	0	0	0	0	0	0	0	0	0	0	0	0	0	0	0	0
313	AOAH	1	1	1	0	0	0	1	1	1	1	7	41	0		AOAH	acyloxyacyl hydrolase	GO:0008653 lipopolysaccharide metabolic process;GO:0009104 lipopolysaccharide catabolic process;GO:0044247 cellular polysaccharide catabolic process	GO:0031410 cytoplasmic vesicle;GO:0097708 intracellular vesicle;GO:0031982 vesicle	GO:0050528 acyloxyacyl hydrolase activity;GO:0052689 carboxylic ester hydrolase activity;GO:0005509 calcium ion binding	This locus encodes both the light and heavy subunits of acyloxyacyl hydrolase. The encoded enzyme catalyzes the hydrolysis of acyloxylacyl-linked fatty acyl chains from bacterial lipopolysaccharides, effectively detoxifying these molecules. The encoded protein may play a role in modulating host inflammatory response to gram-negative bacteria. Alternatively spliced transcript variants have been de…	blood		antibody: Gastrointestinal glandular cells, the seminal vesicle and smooth muscle cells exhibited strong cytoplasmic staining. Skeletal muscle and the adrenal gland displayed moderate cytoplasmic staining. Remaining normal tissues were negative or weakly stained.; Cytoplasmic expression in several different tissue types.	Distribution: Detected in many; Specificity: Tissue enhanced	chr7:36724544-36509313	Enzymes; ENZYME proteins:Hydrolases; Predicted secreted proteins	Vesicles (Uncertain)	[GO:0003674] molecular_function; [GO:0005575] cellular_component; [GO:0005622] intracellular anatomical structure; [GO:0043226] organelle; [GO:0043167] ion binding; [GO:0008150] biological_process; [GO:0006629] lipid metabolic process; [GO:0044281] small molecule metabolic process; [GO:0005576] extracellular region; [GO:0005737] cytoplasm; [GO:0031410] cytoplasmic vesicle; [GO:0005975] carbohydra…		Chronic pelvic pain of female; Bladder pain syndrome; Pelvic pain female; Pelvic Pain; Gram-Negative Bacterial Infections; Chronic interstitial cystitis; Amphetamine Abuse; Amphetamine-Related Disorders; Amphetamine Addiction; Interstitial Cystitis; Chronic sinusitis; Allergic asthma; Craniosynostosis; Pneumonitis; Anxiety Disorders; Pneumonia; Anxiety; Septicemia; Sepsis; Depressed mood; Mental …		AOAH	0	0	1	0	0	0	0	0	0	1	1	1	0	0	1	1
314	AOC2	0	0	0	0	0	1	0	0	0	0	1	1	0		AOC2	amine oxidase copper containing 2	GO:0006584 catecholamine metabolic process;GO:0009712 catechol-containing compound metabolic process;GO:0018958 phenol-containing compound metabolic process	GO:0005886 plasma membrane;GO:0071944 cell periphery;GO:0016020 membrane	GO:0052593 tryptamine:oxygen oxidoreductase (deaminating) activity;GO:0052594 aminoacetone:oxygen oxidoreductase(deaminating) activity;GO:0052595 aliphatic-amine oxidase activity	Copper amine oxidases catalyze the oxidative conversion of amines to aldehydes and ammonia in the presence of copper and quinone cofactor. This gene shows high sequence similarity to copper amine oxidases from various species ranging from bacteria to mammals. The protein contains several conserved motifs including the active site of amine oxidases and the histidine residues that likely bind coppe…	eye	(hsa00360)Phenylalanine metabolism; (hsa00410)beta-Alanine metabolism; (hsa00350)Tyrosine metabolism	antibody: Renal tubules, rectum and appendix displayed strong cytoplasmic staining with additional nuclear positivity in lymphoid tissue. Adrenocortical cells, bronchus, colon, gall bladder, heart muscle cells, exocrine pancreas, stomach and thyroid were moderately stained. Remaining normal tissues were weakly stained or negative.; Estimation of protein expression could not be performed. View pri…	Distribution: Detected in many; Specificity: Low tissue specificity	chr17:42844580-42850707	Enzymes; Predicted intracellular proteins; ENZYME proteins:Oxidoreductases		[GO:0003674] molecular_function; [GO:0043167] ion binding; [GO:0016491] oxidoreductase activity; [GO:0008150] biological_process; [GO:0050877] nervous system process; [GO:0005575] cellular_component; [GO:0005622] intracellular anatomical structure; [GO:0005737] cytoplasm; [GO:0005886] plasma membrane; [GO:0006091] generation of precursor metabolites and energy; [GO:0034641] cellular nitrogen comp…		Sarcoid myopathy; MYOPATHY, MYOFIBRILLAR, DESMIN-RELATED; Dilatation of aorta; Large-artery atherosclerosis (embolus/thrombosis); Cerebral Amyloid Angiopathy; Lymphoproliferative Disorder of the Skin; Inclusion Body Myositis (disorder); AURAL ATRESIA, CONGENITAL; Airway Obstruction; Chronic lung disease; Proliferative diabetic retinopathy; Adult type dermatomyositis; Dermatomyositis; Complication…		AOC2	0	0	0	0	0	0	0	0	0	0	0	0	0	0	0	0
316	AOX1	0	0	1	0	0	0	0	0	0	0	1	2	0		AOX1	aldehyde oxidase 1	GO:0006805 xenobiotic metabolic process;GO:0071466 cellular response to xenobiotic stimulus;GO:0009410 response to xenobiotic stimulus	GO:0070062 extracellular exosome;GO:1903561 extracellular vesicle;GO:0043230 extracellular organelle	GO:0102797 geranial:oxygen oxidoreductase activity;GO:0102798 heptaldehyde:oxygen oxidoreductase activity;GO:0004031 aldehyde oxidase activity	Aldehyde oxidase produces hydrogen peroxide and, under certain conditions, can catalyze the formation of superoxide. Aldehyde oxidase is a candidate gene for amyotrophic lateral sclerosis. [provided by RefSeq, Jul 2008]	liver	(hsa00750)Vitamin B6 metabolism; (hsa00760)Nicotinate and nicotinamide metabolism; (hsa00350)Tyrosine metabolism	antibody: Strong cytoplasmic or membranous positivity was observed in liver, adrenal gland, kidney, gastrointestinal tract, male reproductive tissues and endometrium. Remaining normal tissues were weakly stained or negative.; Cytoplasmic expression most abundant in hepatocytes, renal tubules, Leydig cells and adrenal glandular cells.	Distribution: Detected in many; Specificity: Group enriched	chr2:200585952-200677064	Enzymes; Predicted intracellular proteins; ENZYME proteins:Oxidoreductases		[GO:0003674] molecular_function; [GO:0043167] ion binding; [GO:0016491] oxidoreductase activity; [GO:0005575] cellular_component; [GO:0005622] intracellular anatomical structure; [GO:0005737] cytoplasm; [GO:0005829] cytosol; [GO:0043226] organelle; [GO:0005576] extracellular region; [GO:0005615] extracellular space; [GO:0008150] biological_process		Xanthinuria, Type I; Meningeal Neoplasms; Combined molybdoflavoprotein enzyme deficiency; Columnar Cell Change of the Breast; Tremor; Fatty Liver; Cirrhosis; Astrocytoma; Non-alcoholic Fatty Liver Disease; Steatohepatitis; Solid Neoplasm; Liver Cirrhosis; Crohn Disease; Prostatic Neoplasms; Childhood Leukemia; Carcinoma of bladder; leukemia; Malignant neoplasm of urinary bladder; Bladder Neoplasm…		AOX1	0	0	0	0	0	0	0	0	0	0	0	0	0	0	0	0
317	APAF1	0	1	0	0	0	0	0	0	0	0	1	1	0		APAF1	apoptotic peptidase activating factor 1	GO:0072414 response to mitotic cell cycle checkpoint signaling;GO:0072432 response to G1 DNA damage checkpoint signaling;GO:0010658 striated muscle cell apoptotic process	GO:0043293 apoptosome;GO:1904813 ficolin-1-rich granule lumen;GO:0101002 ficolin-1-rich granule	GO:0008656 cysteine-type endopeptidase activator activity involved in apoptotic process;GO:0016505 peptidase activator activity involved in apoptotic process;GO:0043531 ADP binding	This gene encodes a cytoplasmic protein that initiates apoptosis. This protein contains several copies of the WD-40 domain, a caspase recruitment domain (CARD), and an ATPase domain (NB-ARC). Upon binding cytochrome c and dATP, this protein forms an oligomeric apoptosome. The apoptosome binds and cleaves caspase 9 preproprotein, releasing its mature, activated form. Activated caspase 9 stimulates…		(hsa04215)Apoptosis - multiple species; (hsa05134)Legionellosis; (hsa01524)Platinum drug resistance	General cytoplasmic expression, most abundant in subsets of immune cells.; antibody: Most normal cells showed moderate to strong cytoplasmic staining. Neuronal cells and lymphoid cells outside reaction centra were generally negative.	Distribution: Detected in all; Specificity: Tissue enhanced	chr12:98645141-98735433	Transporters:Accessory Factors Involved in Transport; Predicted intracellular proteins; Cancer-related genes:Mutational cancer driver genes; Cancer-related genes:Candidate cancer biomarkers	Cytosol;Nucleoplasm (Supported); Additional: Golgi apparatus	[GO:0003674] molecular_function; [GO:0008150] biological_process; [GO:0008219] cell death; [GO:0043167] ion binding; [GO:0007165] signal transduction; [GO:0005575] cellular_component; [GO:0005622] intracellular anatomical structure; [GO:0032991] protein-containing complex; [GO:0005737] cytoplasm; [GO:0005829] cytosol; [GO:0005576] extracellular region; [GO:0043226] organelle; [GO:0005615] extrace…		Retinal Pigment Epithelial Detachment; Lysinuric Protein Intolerance; Neonatal Deformity; Nevi and Melanomas; MSI-low; CML progression; Muscular Atrophy; Eye Abnormalities; Solitary fibrous tumor; Carcinoma of urinary bladder, superficial; Tumour budding; Lymphocytic infiltration; Noonan Syndrome; Chlamydia Infections; Skin Abnormalities; Protein Deficiency; Amyotrophic Lateral Sclerosis, Familia…		APAF1	0	0	0	0	0	0	0	0	0	0	0	0	0	0	0	0
319	APOF	0	1	0	1	0	0	0	0	0	0	2	4	0		APOF	apolipoprotein F	GO:0008203 cholesterol metabolic process;GO:1902652 secondary alcohol metabolic process;GO:0016125 sterol metabolic process	GO:0034362 low-density lipoprotein particle;GO:0034364 high-density lipoprotein particle;GO:0034358 plasma lipoprotein particle	GO:0015485 cholesterol binding;GO:0032934 sterol binding;GO:0043178 alcohol binding	The product of this gene is one of the minor apolipoproteins found in plasma. This protein forms complexes with lipoproteins and may be involved in transport and/or esterification of cholesterol. [provided by RefSeq, Jul 2008]				Distribution: Detected in some; Specificity: Tissue enriched	chr12:56362857-56360568	Predicted secreted proteins		[GO:0008150] biological_process; [GO:0006629] lipid metabolic process; [GO:0005575] cellular_component; [GO:0005576] extracellular region; [GO:0005615] extracellular space; [GO:0044281] small molecule metabolic process; [GO:0006810] transport; [GO:0032991] protein-containing complex; [GO:0003674] molecular_function; [GO:0008289] lipid binding		Hyperlipidemia; Hypercholesterolemia; Non-alcoholic Fatty Liver Disease; Liver neoplasms; Depressed mood; Heart failure; Congestive heart failure; Alzheimer's Disease; Liver carcinoma		APOF	0	0	0	0	0	0	0	0	0	0	0	0	0	0	0	0
320	APBA1	0	1	0	0	0	0	0	0	1	1	3	7	0		APBA1	amyloid beta precursor protein binding family A member 1	GO:0014051 gamma-aminobutyric acid secretion;GO:0014047 glutamate secretion;GO:0015812 gamma-aminobutyric acid transport	GO:0048787 presynaptic active zone membrane;GO:0098685 Schaffer collateral - CA1 synapse;GO:0048786 presynaptic active zone	GO:0001540 amyloid-beta binding;GO:0042277 peptide binding;GO:0033218 amide binding	The protein encoded by this gene is a member of the X11 protein family. It is a neuronal adapter protein that interacts with the Alzheimer's disease amyloid precursor protein (APP). It stabilizes APP and inhibits production of proteolytic APP fragments including the A beta peptide that is deposited in the brains of Alzheimer's disease patients. This gene product is believed to be involved in sign…				Distribution: Detected in many; Specificity: Tissue enhanced	chr9:69673012-69427532	Transporters:Accessory Factors Involved in Transport; Predicted intracellular proteins	Golgi apparatus (Supported)	[GO:0003674] molecular_function; [GO:0008150] biological_process; [GO:0007267] cell-cell signaling; [GO:0005575] cellular_component; [GO:0005622] intracellular anatomical structure; [GO:0005737] cytoplasm; [GO:0031410] cytoplasmic vesicle; [GO:0043226] organelle; [GO:0022607] cellular component assembly; [GO:0065003] protein-containing complex assembly; [GO:0005634] nucleus; [GO:0006810] transpor…		Memory dysfunction; Hereditary Nonpolyposis Colorectal Cancer; Hyperplastic Polyp; Cytomegalovirus Infections; Kaposi Sarcoma; Gastrointestinal Stromal Tumors; SCOLIOSIS, ISOLATED, SUSCEPTIBILITY TO, 3; Adenomatous Polyposis Coli; Intelligence; Adolescent idiopathic scoliosis; mathematical ability; Hepatocarcinogenesis; Adenoma; Ulcerative Colitis; Adenocarcinoma; Carcinoma; Schizophrenia; Alzhei…		APBA1	0	0	0	0	0	0	0	1	0	0	0	0	0	0	1	0
321	APBA2	0	0	0	0	0	0	0	1	0	0	1	1	0		APBA2	amyloid beta precursor protein binding family A member 2	GO:0007268 chemical synaptic transmission;GO:0098916 anterograde trans-synaptic signaling;GO:0099537 trans-synaptic signaling	GO:0043197 dendritic spine;GO:0044309 neuron spine;GO:0008021 synaptic vesicle	GO:0001540 amyloid-beta binding;GO:0042277 peptide binding;GO:0033218 amide binding	The protein encoded by this gene is a member of the X11 protein family. It is a neuronal adapter protein that interacts with the Alzheimer's disease amyloid precursor protein (APP). It stabilizes APP and inhibits production of proteolytic APP fragments including the A beta peptide that is deposited in the brains of Alzheimer's disease patients. This gene product is believed to be involved in sign…			antibody: Normal tissues showed moderate to strong cytoplasmic positivity. Additional nuclear staining was observed in several cases. Pancreatic islets, glomeruli and white pulp of spleen were weakly stained or negative.; General cytoplasmic expression.	Distribution: Detected in many; Specificity: Tissue enhanced	chr15:28885479-29118315	Transporters:Accessory Factors Involved in Transport; Predicted intracellular proteins	Golgi apparatus (Enhanced)	[GO:0003674] molecular_function; [GO:0008150] biological_process; [GO:0007267] cell-cell signaling; [GO:0005575] cellular_component; [GO:0005622] intracellular anatomical structure; [GO:0005737] cytoplasm; [GO:0031410] cytoplasmic vesicle; [GO:0043226] organelle; [GO:0006810] transport; [GO:0015031] protein transport; [GO:0005886] plasma membrane; [GO:0048856] anatomical structure development; [G…		Fundic gland polyp; ECTRODACTYLY, ECTODERMAL DYSPLASIA, AND CLEFT LIP/PALATE SYNDROME 1; Peritoneal dissemination; Gilles de la Tourette syndrome; Gastritis, Atrophic; Hyperplastic Polyp; Borderline Personality Disorder; Senile Plaques; Pervasive Development Disorder; Hepatitis A; Kaposi Sarcoma; Mental deterioration; Gastrointestinal Stromal Tumors; Adenomatous Polyposis Coli; Dermatologic disor…		APBA2	0	0	0	0	0	0	0	0	0	0	0	0	0	0	0	0
324	APC	0	0	0	0	0	1	0	0	0	0	1	1	0		APC	APC regulator of WNT signaling pathway	GO:1904781 positive regulation of protein localization to centrosome;GO:1904779 regulation of protein localization to centrosome;GO:0031272 regulation of pseudopodium assembly	GO:0030877 beta-catenin destruction complex;GO:1990909 Wnt signalosome;GO:0016342 catenin complex	GO:0045295 gamma-catenin binding;GO:0051010 microtubule plus-end binding;GO:0070840 dynein complex binding	This gene encodes a tumor suppressor protein that acts as an antagonist of the Wnt signaling pathway. It is also involved in other processes including cell migration and adhesion, transcriptional activation, and apoptosis. Defects in this gene cause familial adenomatous polyposis (FAP), an autosomal dominant pre-malignant disease that usually progresses to malignancy. Mutations in the APC gene ha…		(hsa05213)Endometrial cancer; (hsa05217)Basal cell carcinoma; (hsa05210)Colorectal cancer	General cytoplasmic and membranous expression.; antibody: Moderate to strong cytoplasmic or membranous positivity was observed a majority of tissues including neuropil in CNS, thyroid gland and testis. Lymphoid tissues were negative.	Distribution: Detected in all; Specificity: Tissue enhanced	chr5:112707498-112846239	Human disease related genes:Cancers:Cancers of the digestive system; Cancer-related genes:Mutated cancer genes; Human disease related genes:Cancers:Cancers of eye, brain, and central nervous system; Cancer-related genes:Mutational cancer driver genes; Human disease related genes:Endocrine and metabolic diseases:Adrenal gland diseases; Disease related genes; Human disease related genes:Digestive s…	Plasma membrane (Approved); Additional: Golgi apparatus;Nucleoplasm	[GO:0005575] cellular_component; [GO:0005622] intracellular anatomical structure; [GO:0043226] organelle; [GO:0005634] nucleus; [GO:0005737] cytoplasm; [GO:0008150] biological_process; [GO:0007049] cell cycle; [GO:0006950] response to stress; [GO:0007267] cell-cell signaling; [GO:0007165] signal transduction; [GO:0003674] molecular_function; [GO:0008219] cell death; [GO:0008283] cell population p…	HP:0030553:Visual acuity no light perception; HP:0011512:Hyperpigmentation of the fundus; HP:0033770:Gastric adenocarcinoma; HP:0031524:Ampulla of Vater carcinoma; HP:0033769:Fundic gland polyposis; HP:0006283:Multiple unerupted teeth; HP:0007129:Cerebellar medulloblastoma; HP:0002234:Early balding; HP:0025388:Thyroid nodule; HP:0025388:Thyroid nodule; HP:0031459:Soft tissue neoplasm; HP:0006722:…	ADENOMATOUS POLYPOSIS COLI WITH CONGENITAL CHOLESTEATOMA; Abscess cavity; BRAIN TUMOR-POLYPOSIS SYNDROME 2 (disorder); Cyst of skin; FAMILIAL ADENOMATOUS POLYPOSIS 1, SUSCEPTIBILITY TO; Hyperpigmentation of the fundus; Malignant tumor of renal pelvis; Rectal Diseases; Recurrent Desmoid-Type Fibromatosis; Renal Pelvis Carcinoma; Senile hyperkeratosis; Streptococcal endocarditis; Tonsillar Neoplasm…	DOID:9256 colorectal cancer;DOID:0080409 familial adenomatous polyposis 1;DOID:684 hepatocellular carcinoma;DOID:0111349 hereditary desmoid disease;DOID:10534 stomach cancer	APC	0	0	0	0	0	0	0	0	0	0	0	0	0	0	0	0
325	APCS	0	0	1	0	0	0	0	1	1	0	3	3	0		APCS	amyloid P component, serum	GO:0044866 modulation by host of viral exo-alpha-sialidase activity;GO:0044867 modulation by host of viral catalytic activity;GO:0044869 negative regulation by host of viral exo-alpha-sialidase activity	GO:0072562 blood microparticle;GO:0062023 collagen-containing extracellular matrix;GO:0031012 extracellular matrix	GO:0001849 complement component C1q complex binding;GO:0046790 virion binding;GO:0001846 opsonin binding	The protein encoded by this gene is a glycoprotein, belonging to the pentraxin family of proteins, which has a characteristic pentameric organization. These family members have considerable sequence homology which is thought to be the result of gene duplication. The binding of the encoded protein to proteins in the pathological amyloid cross-beta fold suggests its possible role as a chaperone. Th…	liver		antibody: Most normal tissues showed weak to moderate cytoplasmic positivity. Cells in the white pulp of spleen and cells in seminiferus ducts showed strong immunoreactivity. Cells in CNS and pancreas were negative. ; Distinct positivity in plasma.	Distribution: Detected in some; Specificity: Tissue enriched	chr1:159587826-159588865	Predicted secreted proteins; Transporters:Transporter channels and pores; Disease related genes; Potential drug targets		[GO:0005575] cellular_component; [GO:0005576] extracellular region; [GO:0005615] extracellular space; [GO:0005622] intracellular anatomical structure; [GO:0043226] organelle; [GO:0005634] nucleus; [GO:0003674] molecular_function; [GO:0043167] ion binding; [GO:0008150] biological_process; [GO:0002376] immune system process; [GO:0006950] response to stress; [GO:0031012] extracellular matrix; [GO:00…		Amyloid Neuropathies; Foreign body giant cell granuloma; Localized amyloidosis; Dianzani autoimmune lymphoproliferative syndrome; Cutaneous Candidiasis; Food anaphylaxis; Dysgammaglobulinemia; Pancreatic Pseudocyst; Hyperchloremia; Immune-complex glomerulonephritis; Non ST segment elevation acute coronary syndrome; Alkaptonuria; Non STEMI; Lymphoproliferative Syndrome, X-Linked, 2; Hyaline Membra…		APCS	0	0	0	0	0	0	0	0	0	0	0	0	0	0	0	0
326	AIRE	0	0	1	0	0	0	0	0	1	0	2	2	0		AIRE	autoimmune regulator	GO:0002458 peripheral T cell tolerance induction;GO:0002509 central tolerance induction to self antigen;GO:0002465 peripheral tolerance induction	GO:0016604 nuclear body;GO:0005654 nucleoplasm;GO:0031981 nuclear lumen	GO:0045182 translation regulator activity;GO:0042393 histone binding;GO:0003682 chromatin binding	This gene encodes a transcriptional regulator that forms nuclear bodies and interacts with the transcriptional coactivator CREB binding protein. The encoded protein plays an important role in immunity by regulating the expression of autoantigens and negative selection of autoreactive T-cells in the thymus. Mutations in this gene cause the rare autosomal-recessive systemic autoimmune disease terme…		(hsa05340)Primary immunodeficiency; (hsa04120)Ubiquitin mediated proteolysis		Distribution: Detected in some; Specificity: Tissue enhanced	chr21:44285876-44298648	Human disease related genes:Immune system diseases:Primary immunodeficiency; Transcription factors:alpha-Helices exposed by beta-structures; Predicted intracellular proteins; Disease related genes		[GO:0003674] molecular_function; [GO:0003677] DNA binding; [GO:0005575] cellular_component; [GO:0005622] intracellular anatomical structure; [GO:0043226] organelle; [GO:0005634] nucleus; [GO:0005737] cytoplasm; [GO:0008150] biological_process; [GO:0009058] biosynthetic process; [GO:0034641] cellular nitrogen compound metabolic process; [GO:0006412] translation; [GO:0002376] immune system process;…	HP:0020123:Tympanosclerosis; HP:0200120:Chronic active hepatitis; HP:0001096:Keratoconjunctivitis; HP:0031817:Decreased circulating parathyroid hormone level; HP:0100530:Abnormal calcium-phosphate regulating hormone level; HP:0002582:Chronic atrophic gastritis; HP:0030629:Perifoveal ring of hyperautofluorescence; HP:0001094:Iridocyclitis; HP:0002289:Alopecia universalis; HP:0003118:Increased circ…	AUTOIMMUNE POLYENDOCRINOPATHY SYNDROME, TYPE I, WITH REVERSIBLE METAPHYSEAL DYSPLASIA; Autoimmune Polyendocrinopathy Syndrome, Type I, Autosomal Dominant; Hyposplenism; Polyglandular Deficiency Syndrome, Persian-Jewish Type; Acquired Hypoparathyroidism; Recurrent herpes simplex; Autoimmune hypoparathyroidism; Hypoparathyroidism, Autosomal Recessive; Chronic candidiasis; Decreased circulating para…	DOID:0050167 autoimmune polyendocrine syndrome type 1	AIRE	0	0	0	0	0	0	0	0	0	0	0	0	0	0	0	0
329	BIRC2	0	0	0	0	0	0	0	0	1	0	1	1	0		BIRC2	baculoviral IAP repeat containing 2	GO:1902442 regulation of ripoptosome assembly involved in necroptotic process;GO:1902443 negative regulation of ripoptosome assembly involved in necroptotic process;GO:1902524 positive regulation of protein K48-linked ubiquitination	GO:0035631 CD40 receptor complex;GO:0001741 XY body;GO:0000803 sex chromosome	GO:0098770 FBXO family protein binding;GO:0043027 cysteine-type endopeptidase inhibitor activity involved in apoptotic process;GO:0043028 cysteine-type endopeptidase regulator activity involved in apoptotic process	The protein encoded by this gene is a member of a family of proteins that inhibits apoptosis by binding to tumor necrosis factor receptor-associated factors TRAF1 and TRAF2, probably by interfering with activation of ICE-like proteases. This encoded protein inhibits apoptosis induced by serum deprivation and menadione, a potent inducer of free radicals. Alternatively spliced transcript variants e…		(hsa04215)Apoptosis - multiple species; (hsa01524)Platinum drug resistance; (hsa05222)Small cell lung cancer	antibody: Strong cytoplasmic staining was observed in parietal cells in stomach whereas Leydig cells showed strong nuclear positivity. Normal tissues in general showed weak to moderate cytoplasmic positivity with additional nuclear staining in a few cases. Pancreas and lymphoid tissues were mainly negative. ; Cytoplasmic and nuclear expression at variable levels in most cells.	Distribution: Detected in all; Specificity: Low tissue specificity	chr11:102347214-102378670	Enzymes; Predicted intracellular proteins; ENZYME proteins:Transferases; Cancer-related genes:Candidate cancer biomarkers	Cytosol;Nucleoli fibrillar center (Supported); Additional: Nucleoplasm	[GO:0008150] biological_process; [GO:0008219] cell death; [GO:0005575] cellular_component; [GO:0005622] intracellular anatomical structure; [GO:0043226] organelle; [GO:0005634] nucleus; [GO:0005737] cytoplasm; [GO:0003674] molecular_function; [GO:0043167] ion binding; [GO:0009058] biosynthetic process; [GO:0034641] cellular nitrogen compound metabolic process; [GO:0007165] signal transduction; [G…		Nephrogenic Diabetes Insipidus, Type I; Malignant Mesothelioma of Peritoneum; Rhabdoid Tumor; Fleck corneal dystrophy; Familial primary gastric lymphoma; Adult Anaplastic Large Cell Lymphoma; HIV Coinfection; Childhood Anaplastic Large Cell Lymphoma; Hereditary pancreatitis; Muscle damage; Mixed Salivary Gland Tumor; Systemic Inflammatory Response Syndrome; androgen independent prostate cancer; H…		BIRC2	0	0	0	0	0	0	0	0	0	0	0	0	0	0	0	0
331	XIAP	0	0	0	0	0	0	0	1	0	0	1	1	0		XIAP	X-linked inhibitor of apoptosis	GO:1902528 regulation of protein linear polyubiquitination;GO:1902530 positive regulation of protein linear polyubiquitination;GO:1990001 inhibition of cysteine-type endopeptidase activity involved in apoptotic process	GO:0005876 spindle microtubule;GO:0005819 spindle;GO:0005874 microtubule	GO:0120283 protein serine/threonine kinase binding;GO:0043027 cysteine-type endopeptidase inhibitor activity involved in apoptotic process;GO:0043028 cysteine-type endopeptidase regulator activity involved in apoptotic process	This gene encodes a protein that belongs to a family of apoptotic suppressor proteins. Members of this family share a conserved motif termed, baculovirus IAP repeat, which is necessary for their anti-apoptotic function. This protein functions through binding to tumor necrosis factor receptor-associated factors TRAF1 and TRAF2 and inhibits apoptosis induced by menadione, a potent inducer of free r…		(hsa04215)Apoptosis - multiple species; (hsa01524)Platinum drug resistance; (hsa05222)Small cell lung cancer	Cytoplasmic expression in most tissues.; antibody: Most normal tissues displayed moderate cytoplasmic positivity. Gastrointestinal tract, respiratory epithelia, glandular cells of uterus and skeletal muscle showed strong staining.	Distribution: Detected in all; Specificity: Low tissue specificity	chrX:123859708-123913972	Human disease related genes:Immune system diseases:Primary immunodeficiency; FDA approved drug targets:Small molecule drugs; Cancer-related genes:Candidate cancer biomarkers; Disease related genes; Enzymes; Predicted intracellular proteins; ENZYME proteins:Transferases	Cytosol;Nucleoplasm (Supported); Additional: Plasma membrane	[GO:0008150] biological_process; [GO:0008219] cell death; [GO:0005575] cellular_component; [GO:0005622] intracellular anatomical structure; [GO:0043226] organelle; [GO:0005634] nucleus; [GO:0005737] cytoplasm; [GO:0003674] molecular_function; [GO:0043167] ion binding; [GO:0006464] cellular protein modification process; [GO:0006950] response to stress; [GO:0007267] cell-cell signaling; [GO:0007165…	HP:0031693:Severe Epstein Barr virus infection; HP:0004787:Fulminant hepatitis; HP:0002961:Dysgammaglobulinemia; HP:0025084:Folliculitis; HP:0100776:Recurrent pharyngitis; HP:0100827:Lymphocytosis; HP:0030080:Burkitt lymphoma; HP:0012219:Erythema nodosum; HP:0002480:Hepatic encephalopathy; HP:0012178:Reduced natural killer cell activity; HP:0012156:Hemophagocytosis; HP:0012156:Hemophagocytosis; H…	Recurrent Hemophagocytic Lymphohistiocytosis; Bowenoid papulosis; Reduced natural killer cell activity; Granulomatous hepatitis; Recurrent pharyngitis; Folliculitis; Dysgammaglobulinemia; IgG Deficiency disorder; Lymphoproliferative Syndrome, X-Linked, 2; Hereditary Autoinflammatory Diseases; Cowpox; Histiocytic syndrome; skin fold (abnormality); Post-transplant lymphoproliferative disorder; Incr…	DOID:0060705 X-linked lymphoproliferative syndrome 1;DOID:0060706 X-linked lymphoproliferative syndrome 2	XIAP	0	0	0	0	0	0	0	0	0	0	0	0	0	0	0	0
333	APLP1	0	0	0	0	0	1	0	0	0	0	1	1	0		APLP1	amyloid beta precursor like protein 1	GO:0071873 response to norepinephrine;GO:0071874 cellular response to norepinephrine stimulus;GO:0106072 negative regulation of adenylate cyclase-activating G protein-coupled receptor signaling pathway	GO:0005604 basement membrane;GO:0062023 collagen-containing extracellular matrix;GO:0031012 extracellular matrix	GO:0031695 alpha-2B adrenergic receptor binding;GO:0031696 alpha-2C adrenergic receptor binding;GO:0031694 alpha-2A adrenergic receptor binding	This gene encodes a member of the highly conserved amyloid precursor protein gene family. The encoded protein is a membrane-associated glycoprotein that is cleaved by secretases in a manner similar to amyloid beta A4 precursor protein cleavage. This cleavage liberates an intracellular cytoplasmic fragment that may act as a transcriptional activator. The encoded protein may also play a role in syn…			antibody: Most normal tissues displayed weak to moderate cytoplasmic positivity, with a granular pattern. Additional nuclear staining was exhibited in neuronal and glial cells. Purkinje cells along with subset of neuronal cells of hippocampus and lymphoid cells of tonsil were strongly stained. Liver, spleen, lymph node, smooth and skeletal muscle cells were negative.; Cytoplasmic expression mainl…	Distribution: Detected in many; Specificity: Tissue enriched	chr19:35868570-35879795	Predicted intracellular proteins	Golgi apparatus;Plasma membrane (Approved); Additional: Nucleoplasm	[GO:0005575] cellular_component; [GO:0003674] molecular_function; [GO:0043167] ion binding; [GO:0005622] intracellular anatomical structure; [GO:0005737] cytoplasm; [GO:0043226] organelle; [GO:0005794] Golgi apparatus; [GO:0005634] nucleus; [GO:0005654] nucleoplasm; [GO:0005886] plasma membrane; [GO:0008150] biological_process; [GO:0008219] cell death; [GO:0007155] cell adhesion; [GO:0006810] tra…		Finnish congenital nephrotic syndrome; Nephrosis, congenital; Influenza due to Influenza A virus subtype H1N1; Familial Alzheimer Disease (FAD); Carcinoid Tumor; Mild cognitive disorder; Neuroendocrine Tumors; Amyloidosis; Epilepsy; Neurodegenerative Disorders; Central neuroblastoma; Childhood Neuroblastoma; Secondary Neoplasm; Neuroblastoma; Alzheimer's Disease; Neoplasm Metastasis; Neoplasms		APLP1	0	0	0	0	0	0	0	0	0	0	0	0	0	0	0	0
335	APOA1	0	0	0	0	0	0	0	0	1	1	2	3	1	WP5115	APOA1	apolipoprotein A1	GO:1902994 regulation of phospholipid efflux;GO:1902995 positive regulation of phospholipid efflux;GO:0010903 negative regulation of very-low-density lipoprotein particle remodeling	GO:0034366 spherical high-density lipoprotein particle;GO:0042627 chylomicron;GO:0034361 very-low-density lipoprotein particle	GO:0070653 high-density lipoprotein particle receptor binding;GO:0034191 apolipoprotein A-I receptor binding;GO:0034190 apolipoprotein receptor binding	This gene encodes apolipoprotein A-I, which is the major protein component of high density lipoprotein (HDL) in plasma. The encoded preproprotein is proteolytically processed to generate the mature protein, which promotes cholesterol efflux from tissues to the liver for excretion, and is a cofactor for lecithin cholesterolacyltransferase (LCAT), an enzyme responsible for the formation of most pla…	liver;spleen	(hsa04977)Vitamin digestion and absorption; (hsa05143)African trypanosomiasis; (hsa04975)Fat digestion and absorption	antibody: Cells in renal tubules and glomeruli showed weak to moderate cytoplasmic positivity. Extracellular staining was observed in several tissues. Remaining normal cells were negative.; Distinct plasma positivity in several tissues.	Distribution: Detected in many; Specificity: Tissue enriched	chr11:116837950-116835751	Human disease related genes:Cardiovascular diseases:Vascular diseases; Candidate cardiovascular disease genes; Cancer-related genes:Candidate cancer biomarkers; Predicted secreted proteins; Human disease related genes:Congenital disorders of metabolism:Congenital disorders of lipid/glycolipid metabolism; Predicted intracellular proteins; Disease related genes; Human disease related genes:Nervous …	Vesicles (Approved); Additional: Cytosol	[GO:0005575] cellular_component; [GO:0005576] extracellular region; [GO:0003674] molecular_function; [GO:0008289] lipid binding; [GO:0008150] biological_process; [GO:0006810] transport; [GO:0005615] extracellular space; [GO:0006629] lipid metabolic process; [GO:0044281] small molecule metabolic process; [GO:0032991] protein-containing complex; [GO:0061024] membrane organization; [GO:0007165] sign…	HP:0003216:Generalized amyloid deposition; HP:0000991:Xanthomatosis; HP:0003233:Decreased HDL cholesterol concentration; HP:0000622:Blurred vision; HP:0001396:Cholestasis; HP:0001392:Abnormality of the liver; HP:0000988:Skin rash; HP:0004374:Hemiplegia/hemiparesis; HP:0000969:Edema; HP:0000112:Nephropathy; HP:0003457:EMG abnormality; HP:0000100:Nephrotic syndrome; HP:0000790:Hematuria; HP:0007957…	APOLIPOPROTEIN A-I (GIESSEN) PHENOTYPE; APOLIPOPROTEIN A-I (MILANO) PHENOTYPE; APOLIPOPROTEIN A-I (MUNSTER4) PHENOTYPE; Arcus senilis, bilateral; Infection by Trypanosoma brucei brucei; Laryngeal amyloidosis; AMYLOIDOSIS, CARDIAC AND CUTANEOUS; APOLIPOPROTEIN A-I (BALTIMORE) PHENOTYPE; APOLIPOPROTEIN A-I (MARBURG) PHENOTYPE; APOLIPOPROTEIN A-I (MUNSTER3B) PHENOTYPE; APOLIPOPROTEIN A-I (MUNSTER3C)…	DOID:0050636 familial visceral amyloidosis;DOID:0080958 primary hypoalphalipoproteinemia 2	APOA1	1	0	0	0	0	0	0	0	0	0	0	0	0	0	0	0
336	APOA2	0	0	1	0	0	0	0	0	1	1	3	8	1	WP5115	APOA2	apolipoprotein A2	GO:0060695 negative regulation of cholesterol transporter activity;GO:0060621 negative regulation of cholesterol import;GO:2000910 negative regulation of sterol import	GO:0034366 spherical high-density lipoprotein particle;GO:0042627 chylomicron;GO:0034361 very-low-density lipoprotein particle	GO:0070653 high-density lipoprotein particle receptor binding;GO:0034190 apolipoprotein receptor binding;GO:0060228 phosphatidylcholine-sterol O-acyltransferase activator activity	This gene encodes apolipoprotein (apo-) A-II, which is the second most abundant protein of the high density lipoprotein particles. The protein is found in plasma as a monomer, homodimer, or heterodimer with apolipoprotein D. Defects in this gene may result in apolipoprotein A-II deficiency or hypercholesterolemia. [provided by RefSeq, Jul 2008]	liver;spleen	(hsa04979)Cholesterol metabolism; (hsa03320)PPAR signaling pathway	Extracellular deposits (plasma) in most tissues.; antibody: Leydig cells and subsets of renal tubuli showed weak cytoplasmic staining while cells in the adrenal gland displayed moderate membranous positivity. Most remaining normal tissues were negative. Plasma was distinctly stained and extracellular positivity was often observed.	Distribution: Detected in many; Specificity: Tissue enriched	chr1:161223628-161222292	Predicted secreted proteins; Predicted intracellular proteins; Candidate cardiovascular disease genes; Cancer-related genes:Candidate cancer biomarkers		[GO:0005575] cellular_component; [GO:0005576] extracellular region; [GO:0003674] molecular_function; [GO:0008289] lipid binding; [GO:0008150] biological_process; [GO:0006810] transport; [GO:0032991] protein-containing complex; [GO:0005615] extracellular space; [GO:0061024] membrane organization; [GO:0005622] intracellular anatomical structure; [GO:0005737] cytoplasm; [GO:0005829] cytosol; [GO:004…	HP:0001084:Corneal arcus; HP:0001114:Xanthelasma; HP:0010874:Tendon xanthomatosis; HP:0003141:Increased LDL cholesterol concentration; HP:0001677:Coronary artery atherosclerosis; HP:0000006:Autosomal dominant inheritance; HP:0000007:Autosomal recessive inheritance	Age-related amyloidosis; HYPERALPHALIPOPROTEINEMIA 1; Lecithin Acyltransferase Deficiency; LDLR mutation; Arcus Senilis; obsolete Combined hyperlipidemia; Amyloidosis, Familial; Eyelid Xanthoma; Fish-Eye Disease; Systemic amyloidosis; Cholesteryl Ester Transfer Protein Deficiency; Nuchal bleb, familial; Hyperlipoproteinemia Type IIb; Primary Systemic Amyloidosis; Hyperlipoproteinemia Type III; Xa…	DOID:13810 familial hypercholesterolemia	APOA2	0	0	0	0	0	0	0	1	0	0	0	0	0	0	0	0
337	APOA4	0	0	0	0	0	0	0	1	1	1	3	3	0		APOA4	apolipoprotein A4	GO:0034444 regulation of plasma lipoprotein oxidation;GO:0034445 negative regulation of plasma lipoprotein oxidation;GO:0006982 response to lipid hydroperoxide	GO:0042627 chylomicron;GO:0034361 very-low-density lipoprotein particle;GO:0034385 triglyceride-rich plasma lipoprotein particle	GO:0060228 phosphatidylcholine-sterol O-acyltransferase activator activity;GO:0120020 cholesterol transfer activity;GO:0120015 sterol transfer activity	Apoliprotein (apo) A-IV gene contains 3 exons separated by two introns. A sequence polymorphism has been identified in the 3'UTR of the third exon. The primary translation product is a 396-residue preprotein which after proteolytic processing is secreted its primary site of synthesis, the intestine, in association with chylomicron particles. Although its precise function is not known, apo A-IV is…		(hsa04977)Vitamin digestion and absorption; (hsa04975)Fat digestion and absorption; (hsa04979)Cholesterol metabolism	High expression in small intestine and distinct positivity in plasma.; antibody: Strong cytoplasmic staining was observed in glandular cells of small intestine and renal tubules. Fallopian tube, respiratory epithelia and cells in glomeruli displayed weak to moderate positivity. Plasma distinctly stained. Remaining normal tissues were negative.	Distribution: Detected in some; Specificity: Tissue enriched	chr11:116823304-116820700	Predicted secreted proteins; Candidate cardiovascular disease genes	Vesicles (Approved)	[GO:0005575] cellular_component; [GO:0005576] extracellular region; [GO:0003674] molecular_function; [GO:0008289] lipid binding; [GO:0008150] biological_process; [GO:0006810] transport; [GO:0005615] extracellular space; [GO:0032991] protein-containing complex; [GO:0061024] membrane organization; [GO:0005622] intracellular anatomical structure; [GO:0005737] cytoplasm; [GO:0005829] cytosol; [GO:004…		APOLIPOPROTEIN A-IV POLYMORPHISM, APOA4*1/APOA4*2 PHENOTYPE; HYPERALPHALIPOPROTEINEMIA 1; Systemic amyloidosis; Cholesteryl Ester Transfer Protein Deficiency; Glycogen Storage Disease Type I; Hyperlipoproteinemia Type IIb; Primary Systemic Amyloidosis; Tangier Disease; Recurrent major depressive episodes; Major depression, single episode; Atherogenesis; Insulin resistance syndrome; Hepatitis E; P…		APOA4	0	0	0	0	0	0	0	0	0	0	0	0	0	0	0	0
341	APOC1	0	0	1	0	0	0	0	0	1	1	3	5	1	WP5115	APOC1	apolipoprotein C1	GO:0010900 negative regulation of phosphatidylcholine catabolic process;GO:0150174 negative regulation of phosphatidylcholine metabolic process;GO:0010899 regulation of phosphatidylcholine catabolic process	GO:0042627 chylomicron;GO:0034361 very-low-density lipoprotein particle;GO:0034385 triglyceride-rich plasma lipoprotein particle	GO:0060228 phosphatidylcholine-sterol O-acyltransferase activator activity;GO:0004859 phospholipase inhibitor activity;GO:0055102 lipase inhibitor activity	This gene encodes a member of the apolipoprotein C1 family. This gene is expressed primarily in the liver, and it is activated when monocytes differentiate into macrophages. The encoded protein plays a central role in high density lipoprotein (HDL) and very low density lipoprotein (VLDL) metabolism. This protein has also been shown to inhibit cholesteryl ester transfer protein in plasma. A pseudo…	liver	(hsa04979)Cholesterol metabolism	Positivity in plasma.; antibody: Plasma showed strong positivity. Hepatocytes, adrenocortical cells, trophoblastic cells and smooth muscle cells were moderately stained. Endothelial cells of cerebral cortex and peripheral nerve in colon displayed strong cytoplasmic positivity. Strong membranous staining was observed in esophagus. Remaining normal tissues were generally negative.	Distribution: Detected in all; Specificity: Tissue enriched	chr19:44914325-44919346	Predicted secreted proteins; Candidate cardiovascular disease genes; Cancer-related genes:Candidate cancer biomarkers		[GO:0005575] cellular_component; [GO:0005576] extracellular region; [GO:0008150] biological_process; [GO:0006810] transport; [GO:0032991] protein-containing complex; [GO:0005615] extracellular space; [GO:0003674] molecular_function; [GO:0005622] intracellular anatomical structure; [GO:0005737] cytoplasm; [GO:0043226] organelle; [GO:0005783] endoplasmic reticulum; [GO:0043167] ion binding; [GO:000…		Scaly skin; Age-associated memory impairment; Hyperlipoproteinemia Type III; Behavioral variant of frontotemporal dementia; Biliary calculi; Primary Progressive Aphasia (disorder); Epithelial hyperplasia of skin; RESTING HEART RATE; Acute Confusional Senile Dementia; Alzheimer's Disease, Focal Onset; Skin Abnormalities; Atrophic condition of skin; Heart Decompensation; Myocardial Failure; Left-Si…		APOC1	0	0	0	0	0	0	0	0	0	0	0	0	0	0	0	0
343	AQP8	0	0	0	0	0	0	0	0	0	1	1	1	0		AQP8	aquaporin 8	GO:0006833 water transport;GO:0042044 fluid transport;GO:0071320 cellular response to cAMP	GO:0045177 apical part of cell;GO:0031966 mitochondrial membrane;GO:0005740 mitochondrial envelope	GO:0015250 water channel activity;GO:0005372 water transmembrane transporter activity;GO:0015267 channel activity	Aquaporin 8 (AQP8) is a water channel protein. Aquaporins are a family of small integral membrane proteins related to the major intrinsic protein (MIP or AQP0). Aquaporin 8 mRNA is found in pancreas and colon but not other tissues. [provided by RefSeq, Jul 2008]	colon	(hsa04976)Bile secretion	antibody: Exocrine pancreas, colon, seminal vesicles, testis and urothelia displayed moderate to strong cytoplasmic and/ or membranous staining with additional distinct nuclear positivity positivity in the glandular cells of stomach. Glandular cells of prostate displayed distinct nuclear positivity. Remaining normal tissues were weakly stained or negative.; Cytoplasmic and membranous expression i…	Distribution: Detected in some; Specificity: Group enriched	chr16:25216917-25228932	Transporters:Transporter channels and pores		[GO:0005575] cellular_component; [GO:0008150] biological_process; [GO:0006810] transport; [GO:0055085] transmembrane transport; [GO:0022857] transmembrane transporter activity; [GO:0003674] molecular_function; [GO:0005622] intracellular anatomical structure; [GO:0005737] cytoplasm; [GO:0043226] organelle; [GO:0005739] mitochondrion; [GO:0005886] plasma membrane		Melanosis coli; Uterine Cervicitis; Atresia; Diarrhoea predominant irritable bowel syndrome; Nephrogenic Diabetes Insipidus; Sweet Syndrome; Sicca Syndrome; Infectious Otitis Media; Otitis Media; synovial sarcoma; Brain Ischemia; Cholestasis; Irritable Bowel Syndrome; Acute pancreatitis; Inflammation; Childhood Astrocytoma; Diarrhea; Astrocytoma; Polycystic Ovary Syndrome; Septicemia; Sepsis; Ulc…		AQP8	0	0	0	0	0	0	0	0	0	0	0	0	0	0	0	0
345	APOC3	0	0	1	0	0	0	0	0	0	0	1	1	0		APOC3	apolipoprotein C3	GO:0010987 negative regulation of high-density lipoprotein particle clearance;GO:0060621 negative regulation of cholesterol import;GO:2000910 negative regulation of sterol import	GO:0034363 intermediate-density lipoprotein particle;GO:0034366 spherical high-density lipoprotein particle;GO:0042627 chylomicron	GO:0070653 high-density lipoprotein particle receptor binding;GO:0055102 lipase inhibitor activity;GO:0070325 lipoprotein particle receptor binding	This gene encodes a protein component of triglyceride (TG)-rich lipoproteins (TRLs) including very low density lipoproteins (VLDL), high density lipoproteins (HDL) and chylomicrons. The encoded protein plays a role in role in the metabolism of these TRLs through multiple modes. This protein has been shown to promote the secretion of VLDL1, inhibit lipoprotein lipase enzyme activity, and delay cat…	liver;spleen	(hsa04979)Cholesterol metabolism; (hsa03320)PPAR signaling pathway	Plasma positivity and extracellular deposits. Expressed in hepatocytes and small intestines.	Distribution: Detected in many; Specificity: Tissue enriched	chr11:116829907-116833072	Candidate cardiovascular disease genes; Cancer-related genes:Candidate cancer biomarkers; Predicted secreted proteins; Human disease related genes:Congenital disorders of metabolism:Congenital disorders of lipid/glycolipid metabolism; FDA approved drug targets:Biotech drugs; Disease related genes	Nucleoplasm (Approved); Additional: Cell Junctions;Nucleoli	[GO:0005575] cellular_component; [GO:0005576] extracellular region; [GO:0003674] molecular_function; [GO:0008289] lipid binding; [GO:0008150] biological_process; [GO:0006810] transport; [GO:0005615] extracellular space; [GO:0006629] lipid metabolic process; [GO:0009056] catabolic process; [GO:0032991] protein-containing complex; [GO:0043226] organelle; [GO:0031012] extracellular matrix; [GO:00303…	HP:0012184:Increased HDL cholesterol concentration; HP:0012184:Increased HDL cholesterol concentration; HP:0012153:Hypotriglyceridemia; HP:0012153:Hypotriglyceridemia; HP:0003563:Decreased LDL cholesterol concentration; HP:0003077:Hyperlipidemia; HP:0003124:Hypercholesterolemia	APOLIPOPROTEIN C-III, NONGLYCOSYLATED PHENOTYPE; Apolipoprotein C-III Deficiency; Deficiency of triacylglycerol lipase; Increased HDL cholesterol concentration; lipoprotein disorder; BREAST CANCER, SOMATIC; Gastric mucosal lesion; Phosphatidylinositol measurement; Spinocerebellar Ataxia 12; Intestinal carcinoma; Decreased LDL cholesterol concentration; Hypotriglyceridemia; Hereditary systemic amy…	DOID:0111370 apolipoprotein C-III deficiency	APOC3	0	0	0	0	0	0	0	0	0	0	0	0	0	0	0	0
346	APOC4	1	1	1	0	0	1	0	1	1	1	7	30	0		APOC4	apolipoprotein C4	GO:0010890 positive regulation of sequestering of triglyceride;GO:0010889 regulation of sequestering of triglyceride;GO:0010884 positive regulation of lipid storage	GO:0034361 very-low-density lipoprotein particle;GO:0034385 triglyceride-rich plasma lipoprotein particle;GO:0034364 high-density lipoprotein particle	GO:0005319 lipid transporter activity;GO:0005215 transporter activity;GO:0005515 protein binding	This gene encodes a lipid-binding protein belonging to the apolipoprotein gene family. The protein is thought to play a role in lipid metabolism. Polymorphisms in this gene may influence circulating lipid levels and may be associated with coronary artery disease risk. This gene is present in a cluster with other related apolipoprotein genes on chromosome 19. Naturally occurring read-through trans…	liver		Positivity in plasma.; antibody: Skeletal myocytes showed strong cytoplasmic staining. Thyroid, lung macrophages and a subset of neuronal cells in cerebral cortex displayed moderate positivity. A subset of renal tubules exhibited moderate membranous staining while stomach, colon, rectum, salivary gland and few urothelial cells showed weak immunoreactivity. Positivity in plasma. Remaining normal t…	Distribution: Detected in some; Specificity: Tissue enriched	chr19:44942237-44945496	Predicted secreted proteins		[GO:0005575] cellular_component; [GO:0005576] extracellular region; [GO:0008150] biological_process; [GO:0006810] transport; [GO:0003674] molecular_function; [GO:0006629] lipid metabolic process; [GO:0032991] protein-containing complex; [GO:0005615] extracellular space; [GO:0042592] homeostatic process		Granulocyte Colony Stimulating Factor Measurement; Autoantibody measurement; Pseudocholinesterase Measurement; Insulin resistance syndrome; Premature coronary artery atherosclerosis; Serum LDL cholesterol measurement; Serum HDL cholesterol measurement; Hypertriglyceridemia; Low density lipoprotein cholesterol measurement; Serum total cholesterol measurement; High density lipoprotein measurement; …		APOC4	1	0	0	0	0	0	0	1	0	1	0	0	0	0	0	0
347	APOD	0	0	0	0	0	0	0	0	1	1	2	2	1	WP5115	APOD	apolipoprotein D	GO:0034443 negative regulation of lipoprotein oxidation;GO:0060588 negative regulation of lipoprotein lipid oxidation;GO:0034442 regulation of lipoprotein oxidation	GO:0022626 cytosolic ribosome;GO:0005840 ribosome;GO:0043025 neuronal cell body	GO:0015485 cholesterol binding;GO:0032934 sterol binding;GO:0043178 alcohol binding	This gene encodes a component of high density lipoprotein that has no marked similarity to other apolipoprotein sequences. It has a high degree of homology to plasma retinol-binding protein and other members of the alpha 2 microglobulin protein superfamily of carrier proteins, also known as lipocalins. This glycoprotein is closely associated with the enzyme lecithin:cholesterol acyltransferase - …			antibody: Moderate to strong cytoplasmic positivity which had a granular pattern was observed in placental trophoblasts, breast, cells in CNS, Leydig cells, hepatocytes, renal tubules and adrenal cortex. Remaining normal tissues were in general weakly stained or negative.; Cytoplasmic and extracellular expression in most tissues.	Distribution: Detected in many; Specificity: Tissue enhanced	chr3:195583940-195568705	Predicted secreted proteins; Candidate cardiovascular disease genes; Cancer-related genes:Candidate cancer biomarkers	Plasma membrane (Approved)	[GO:0003674] molecular_function; [GO:0008289] lipid binding; [GO:0008150] biological_process; [GO:0006810] transport; [GO:0007568] aging; [GO:0005575] cellular_component; [GO:0005576] extracellular region; [GO:0005615] extracellular space; [GO:0005622] intracellular anatomical structure; [GO:0005737] cytoplasm; [GO:0043226] organelle; [GO:0005783] endoplasmic reticulum; [GO:0006629] lipid metabol…		Bromhidrosis; Hypodynamia; Hypokinesia, Antiorthostatic; Impotence, Vasculogenic; Gonadal Dysgenesis, Mixed; Adult Learning Disorders; Developmental Academic Disorder; Learning Disturbance; fibroma; Dermatofibrosarcoma; Microvascular Angina; Degenerative Diseases, Spinal Cord; Degenerative Diseases, Central Nervous System; Learning Disorders; Hypokinesia; End stage cardiac failure; mixed gliomas;…		APOD	0	0	0	0	0	0	0	0	0	0	0	0	0	0	0	0
350	APOH	0	0	0	0	0	1	0	0	0	0	1	1	1	WP5115	APOH	apolipoprotein H	GO:0034196 acylglycerol transport;GO:0034197 triglyceride transport;GO:0007597 blood coagulation, intrinsic pathway	GO:0042627 chylomicron;GO:0031089 platelet dense granule lumen;GO:0034361 very-low-density lipoprotein particle	GO:0060230 lipoprotein lipase activator activity;GO:0060229 lipase activator activity;GO:0008201 heparin binding	Apolipoprotein H, also known as beta-2-glycoprotein I, is a component of circulating plasma lipoproteins. It has been implicated in a variety of physiologic pathways including lipoprotein metabolism, coagulation, hemostasis, and the production of antiphospholipid autoantibodies. APOH may be a required cofactor for anionic phospholipid binding by the antiphospholipid autoantibodies found in sera o…	liver	(hsa04979)Cholesterol metabolism	antibody: Cytoplasmic and secreted/extracellular staining is observed in many normal tissues. Plasma showed moderate positivity.; Selective positivity in plasma.	Distribution: Detected in some; Specificity: Tissue enriched	chr17:66229415-66212033	Predicted secreted proteins; Predicted intracellular proteins; Candidate cardiovascular disease genes	Golgi apparatus (Supported)	[GO:0003674] molecular_function; [GO:0005575] cellular_component; [GO:0005576] extracellular region; [GO:0005615] extracellular space; [GO:0008150] biological_process; [GO:0006950] response to stress; [GO:0043226] organelle; [GO:0031012] extracellular matrix; [GO:0030312] external encapsulating structure; [GO:0008289] lipid binding; [GO:0032991] protein-containing complex; [GO:0048856] anatomical…		Antiphospholipid antibodies measurement; Isolated thrombocytopenia; Disorientation; Evans syndrome; Activated Partial Thromboplastin Time measurement; Macrovascular disease; Creatine kinase measurement; Primary antiphospholipid syndrome; Neuropsychiatric Systemic Lupus Erythematosus; Septicaemia due to gram-negative organism, unspecified; Leprosy, Multibacillary; Stiff-Person Syndrome; Diastolic …		APOH	0	0	0	0	0	0	0	0	0	0	0	0	0	0	0	0
351	APP	0	1	0	0	0	0	0	0	0	0	1	2	0		APP	amyloid beta precursor protein	GO:0071873 response to norepinephrine;GO:0071874 cellular response to norepinephrine stimulus;GO:0048669 collateral sprouting in absence of injury	GO:1990761 growth cone lamellipodium;GO:1990812 growth cone filopodium;GO:0005641 nuclear envelope lumen	GO:0051425 PTB domain binding;GO:0016504 peptidase activator activity;GO:0004867 serine-type endopeptidase inhibitor activity	This gene encodes a cell surface receptor and transmembrane precursor protein that is cleaved by secretases to form a number of peptides. Some of these peptides are secreted and can bind to the acetyltransferase complex APBB1/TIP60 to promote transcriptional activation, while others form the protein basis of the amyloid plaques found in the brains of patients with Alzheimer disease. In addition, …		(hsa04726)Serotonergic synapse; (hsa05010)Alzheimer disease; (hsa05022)Pathways of neurodegeneration - multiple diseases	antibody: Neuronal cells in CNS and perineuronal cells displayed moderate cytoplasmic positivity. Remaining normal cells were generally negative.; Cytoplasmic expression in CNS and a few other tissues.	Distribution: Detected in all; Specificity: Low tissue specificity	chr21:26171128-25880550	FDA approved drug targets:Small molecule drugs; Predicted secreted proteins; Predicted intracellular proteins; Disease related genes; Transporters:Transporter channels and pores; Human disease related genes:Nervous system diseases:Neurodegenerative diseases	Golgi apparatus (Approved); Additional: Vesicles	[GO:0005575] cellular_component; [GO:0003674] molecular_function; [GO:0030234] enzyme regulator activity; [GO:0043167] ion binding; [GO:0008150] biological_process; [GO:0048856] anatomical structure development; [GO:0006950] response to stress; [GO:0005622] intracellular anatomical structure; [GO:0043226] organelle; [GO:0005634] nucleus; [GO:0005737] cytoplasm; [GO:0005783] endoplasmic reticulum;…	HP:0004968:Recurrent cerebral hemorrhage; HP:0004938:Tortuous cerebral arteries; HP:0410054:Decreased circulating GABA concentration; HP:0011695:Cerebellar hemorrhage; HP:0030219:Semantic dementia; HP:0010525:Finger agnosia; HP:0002423:Long-tract signs; HP:0003791:Deposits immunoreactive to beta-amyloid protein; HP:0011970:Cerebral amyloid angiopathy; HP:0011970:Cerebral amyloid angiopathy; HP:00…	CEREBRAL AMYLOID ANGIOPATHY, APP-RELATED; CEREBRAL AMYLOID ANGIOPATHY, APP-RELATED, ARCTIC VARIANT; CEREBRAL AMYLOID ANGIOPATHY, APP-RELATED, FLEMISH VARIANT; CEREBRAL AMYLOID ANGIOPATHY, APP-RELATED, IOWA VARIANT; CEREBRAL AMYLOID ANGIOPATHY, APP-RELATED, ITALIAN VARIANT; CEREBRAL AMYLOID ANGIOPATHY, APP-RELATED, PIEDMONT VARIANT; Cerebritis; Disorder of olfactory system; Hereditary cerebrovascu…	DOID:0080348 Alzheimer's disease 1;DOID:0070028 APP-related cerebral amyloid angiopathy	APP	0	0	0	0	0	0	0	0	0	0	0	0	0	0	0	0
354	KLK3	0	0	1	0	0	0	0	0	1	0	2	2	0		KLK3	kallikrein related peptidase 3	GO:0002803 positive regulation of antibacterial peptide production;GO:0002786 regulation of antibacterial peptide production;GO:0002225 positive regulation of antimicrobial peptide production	GO:0030141 secretory granule;GO:0099503 secretory vesicle;GO:0070062 extracellular exosome	GO:0016811 hydrolase activity, acting on carbon-nitrogen (but not peptide) bonds, in linear amides;GO:0016810 hydrolase activity, acting on carbon-nitrogen (but not peptide) bonds;GO:0004252 serine-type endopeptidase activity	Kallikreins are a subgroup of serine proteases having diverse physiological functions. Growing evidence suggests that many kallikreins are implicated in carcinogenesis and some have potential as novel cancer and other disease biomarkers. The gene is one of the fifteen kallikrein subfamily members located in a cluster on chromosome 19. It encodes a single-chain glycoprotein, a protease which is sy…	mammary_gland;prostate	(hsa05215)Prostate cancer; (hsa05200)Pathways in cancer	Selective cytoplasmic expression in prostate.; antibody: Normal prostate epithelia showed distinct cytoplasmic staining. The staining pattern was strongest towards luminal membranes. Most other normal tissues were negative.	Distribution: Detected in many; Specificity: Tissue enriched	chr19:50854915-50860764	FDA approved drug targets:Small molecule drugs; Cancer-related genes:Candidate cancer biomarkers; ENZYME proteins:Hydrolases; Predicted secreted proteins; Enzymes; Peptidases:Serine-type peptidases		[GO:0008150] biological_process; [GO:0003674] molecular_function; [GO:0008233] peptidase activity; [GO:0005575] cellular_component; [GO:0005622] intracellular anatomical structure; [GO:0043226] organelle; [GO:0005634] nucleus; [GO:0032991] protein-containing complex; [GO:0005576] extracellular region; [GO:0005615] extracellular space; [GO:0048856] anatomical structure development; [GO:0048646] an…		Castration-Naive Prostate Carcinoma; Penile swelling; Prostate Leiomyosarcoma; Prostate cancer stage D; Prostate nodule; Prostatic pain; Seminal Vesicle Adenocarcinoma; Stage I Prostate Cancer AJCC v7; Stage I Prostate Cancer AJCC v8; Stage I Prostate Carcinoma; Catastrophic antiphospholipid syndrome; Cancer, Benign; Prostatic Infection; Atrophy of prostate; Benign prostatic hypertrophy; Corn of …		KLK3	0	0	0	0	0	0	0	0	0	0	0	0	0	0	0	0
355	FAS	1	1	1	0	1	1	0	1	1	1	8	13	0		FAS	Fas cell surface death receptor	GO:0036337 Fas signaling pathway;GO:0097049 motor neuron apoptotic process;GO:0006924 activation-induced cell death of T cells	GO:0031265 CD95 death-inducing signaling complex;GO:0031264 death-inducing signaling complex;GO:0045121 membrane raft	GO:0005031 tumor necrosis factor-activated receptor activity;GO:0005035 death receptor activity;GO:0005516 calmodulin binding	The protein encoded by this gene is a member of the TNF-receptor superfamily. This receptor contains a death domain. It has been shown to play a central role in the physiological regulation of programmed cell death, and has been implicated in the pathogenesis of various malignancies and diseases of the immune system. The interaction of this receptor with its ligand allows the formation of a death…		(hsa05143)African trypanosomiasis; (hsa05330)Allograft rejection; (hsa05332)Graft-versus-host disease	RNA-based expert annotation gave inconclusive results.; antibody: Moderate to strong membranous and cytoplasmic positivity was diplsayed in the intestinal tract, gall bladder, Leydig cells, subsets of cells in renal tubules, endometrium and decidual cells. Remaining normal tissues were weakly stained or negative.	Distribution: Detected in all; Specificity: Low tissue specificity	chr10:88968429-89017059	Human disease related genes:Immune system diseases:Primary immunodeficiency; Human disease related genes:Cancers:Cancers of the digestive system; Candidate cardiovascular disease genes; CD markers; Cancer-related genes:Candidate cancer biomarkers; Human disease related genes:Cancers:Cancers of haematopoietic and lymphoid tissues; Predicted secreted proteins; Disease related genes; Human disease r…	Plasma membrane (Supported); Additional: Cytosol;Nuclear bodies	[GO:0003674] molecular_function; [GO:0008150] biological_process; [GO:0007165] signal transduction; [GO:0005575] cellular_component; [GO:0002376] immune system process; [GO:0008219] cell death; [GO:0005886] plasma membrane; [GO:0005622] intracellular anatomical structure; [GO:0005737] cytoplasm; [GO:0005829] cytosol; [GO:0043226] organelle; [GO:0005634] nucleus; [GO:0005654] nucleoplasm; [GO:0005…	HP:0002853:Increased proportion of HLA DR+ T cells; HP:0002290:Poliosis; HP:0003454:Platelet antibody positive; HP:0002972:Reduced delayed hypersensitivity; HP:0002731:Decreased lymphocyte apoptosis; HP:0040126:Abnormal vitamin B12 level; HP:0040126:Abnormal vitamin B12 level; HP:0003262:Smooth muscle antibody positivity; HP:0031393:Abnormal proportion of CD8-positive T cells; HP:0031393:Abnormal…	Acute HIV syndrome; Anemia, Splenic; Idiopathic neutropenia; SQUAMOUS CELL CARCINOMA, BURN SCAR-RELATED, SOMATIC; Systemic juvenile chronic arthritis; Adenoviral hepatitis; Taste Disorder, Anterior Tongue; Taste Disorder, Posterior Tongue; Taste Disorder, Primary; Taste Disorder, Primary, Bitter; Taste Disorder, Primary, Salt; Taste Disorder, Primary, Sweet; Taste Disorder, Secondary; Taste Disor…	DOID:6688 autoimmune lymphoproliferative syndrome	FAS	0	0	0	0	0	0	0	0	0	0	1	0	0	0	0	0
357	SHROOM2	0	1	1	0	0	1	0	0	1	1	5	12	0		SHROOM2	shroom family member 2	GO:0008057 eye pigment granule organization;GO:0043476 pigment accumulation;GO:0043482 cellular pigment accumulation	GO:0030864 cortical actin cytoskeleton;GO:0030863 cortical cytoskeleton;GO:0005923 bicellular tight junction	GO:0015280 ligand-gated sodium channel activity;GO:0005272 sodium channel activity;GO:0008013 beta-catenin binding	This gene represents the human homolog of Xenopus laevis apical protein (APX) gene, which is implicated in amiloride-sensitive sodium channel activity. It is expressed in endothelial cells and facilitates the formation of a contractile network within endothelial cells. Depletion of this gene results in an increase in endothelial sprouting, migration, and angiogenesis. This gene is highly expresse…			Cytoplasmic expression in most tissues.; antibody: Most of the normal cells displayed weak to moderate cytoplasmic immunoreactivity. Thyroid gland, placental trophoblasts, salivary gland, colon and duodenum were strongly stained. Additional nuclear staining was observed in squamous epithelia, testis and Purkinje cells. Fallopian tube, prostate, and post menopausal endometrial glands showed additi…	Distribution: Detected in many; Specificity: Tissue enhanced	chrX:9786406-9949443	Predicted intracellular proteins	Cell Junctions;Plasma membrane (Approved); Additional: Cytosol	[GO:0003674] molecular_function; [GO:0008092] cytoskeletal protein binding; [GO:0008150] biological_process; [GO:0043473] pigmentation; [GO:0005575] cellular_component; [GO:0005622] intracellular anatomical structure; [GO:0005737] cytoplasm; [GO:0005886] plasma membrane; [GO:0043226] organelle; [GO:0005856] cytoskeleton; [GO:0006810] transport; [GO:0055085] transmembrane transport; [GO:0005576] e…		Albinism, Ocular; Ocular albinism, type I; COLORECTAL CANCER, SUSCEPTIBILITY TO, 3; COLORECTAL CANCER, SUSCEPTIBILITY TO, 1; COLORECTAL CANCER, SUSCEPTIBILITY TO, 10; COLORECTAL CANCER, SUSCEPTIBILITY TO, 12; Malignant neoplasm of large intestine; Neural Tube Defects; Neurofibromatosis 1; Adenocarcinoma of large intestine; Colorectal Neoplasms; Nasopharyngeal carcinoma; Secondary Neoplasm; Malign…		SHROOM2	0	0	0	0	0	0	0	0	0	0	0	0	0	0	0	0
358	AQP1	0	0	0	0	0	0	0	1	0	0	1	1	0		AQP1	aquaporin 1 (Colton blood group)	GO:0035378 carbon dioxide transmembrane transport;GO:0046878 positive regulation of saliva secretion;GO:0030950 establishment or maintenance of actin cytoskeleton polarity	GO:0031526 brush border membrane;GO:0005903 brush border;GO:0042383 sarcolemma	GO:0030184 nitric oxide transmembrane transporter activity;GO:0035379 carbon dioxide transmembrane transporter activity;GO:0005223 intracellular cGMP-activated cation channel activity	This gene encodes a small integral membrane protein with six bilayer spanning domains that functions as a water channel protein. This protein permits passive transport of water along an osmotic gradient. This gene is a possible candidate for disorders involving imbalance in ocular fluid movement. [provided by RefSeq, Aug 2016]		(hsa04964)Proximal tubule bicarbonate reclamation; (hsa04924)Renin secretion; (hsa04976)Bile secretion	Selective membranous expression in renal tubules, exocrine pancreas, bile ducts, subsets of cells in the intestine, myoepithelial cells of breast and endothelial cells.; antibody: Strong membraneous staining was observed in endothelial cells, renal tubules, exocrine pancreas myoepithelial cells of breast and outer membrane of salivary glands. Neurophil in CNS were positive. Remaining normal cells…	Distribution: Detected in many; Specificity: Low tissue specificity	chr7:30911853-30925516	Blood group antigen proteins; Transporters:Transporter channels and pores	Plasma membrane (Supported)	[GO:0005575] cellular_component; [GO:0008150] biological_process; [GO:0006810] transport; [GO:0055085] transmembrane transport; [GO:0022857] transmembrane transporter activity; [GO:0003674] molecular_function; [GO:0005622] intracellular anatomical structure; [GO:0043226] organelle; [GO:0005634] nucleus; [GO:0005737] cytoplasm; [GO:0008219] cell death; [GO:0005886] plasma membrane; [GO:0005635] nu…		COLTON-NULL PHENOTYPE; Edema, Cardiac; Choledochal Cyst, Type I; Choledochal Cyst, Type II; Choledochal Cyst, Type III; Choledochal Cyst, Type IV; Choledochal Cyst, Type V; Endotoxic shock; Chiari malformation type II; Disorder of circulatory system; Primary Hyperthyroidism; Childhood Supratentorial Ependymoma; Numbness; Ultrafiltration failure; Ependymoma of brain; Urban cutaneous leishmaniasis;…		AQP1	0	0	0	0	0	0	0	0	0	0	0	0	0	0	0	0
363	AQP6	0	0	0	0	0	0	0	0	0	1	1	1	0		AQP6	aquaporin 6	GO:0015706 nitrate transport;GO:0015670 carbon dioxide transport;GO:0019755 one-carbon compound transport	GO:0016324 apical plasma membrane;GO:0045177 apical part of cell;GO:0030659 cytoplasmic vesicle membrane	GO:0015112 nitrate transmembrane transporter activity;GO:0015250 water channel activity;GO:0005372 water transmembrane transporter activity	The protein encoded by this gene is an aquaporin protein, which functions as a water channel in cells. Aquaporins are a family of small integral membrane proteins related to the major intrinsic protein (MIP or AQP0). This protein is specific for the kidney. This gene and related family members AQP0, AQP2, and AQP5 reside in a cluster on chromosome 12q13. [provided by RefSeq, Jul 2008]			antibody: Subset of cells in stomach and renal tubules showed strong cytoplasmic positivity. Heart myocytes were moderately positive. Remaining normal tissues were weakly stained or negative.; Selective cytoplasmic expression in renal tubules.	Distribution: Detected in some; Specificity: Tissue enriched	chr12:49972947-49977139	Transporters:Transporter channels and pores		[GO:0005575] cellular_component; [GO:0008150] biological_process; [GO:0006810] transport; [GO:0055085] transmembrane transport; [GO:0022857] transmembrane transporter activity; [GO:0003674] molecular_function; [GO:0005622] intracellular anatomical structure; [GO:0005737] cytoplasm; [GO:0031410] cytoplasmic vesicle; [GO:0043226] organelle; [GO:0005886] plasma membrane; [GO:0048856] anatomical stru…		Senter syndrome; Keratitis-Ichthyosis-Deafness Syndrome; Idiopathic scoliosis; Hemorrhagic Fever, Crimean; Meniere Disease; Congenital ichthyosis; Substance Withdrawal Syndrome; Acoustic Neuroma; Keratitis; Obsessive-Compulsive Disorder; Ichthyoses; Congenital diaphragmatic hernia; Benign Neoplasm; Irritable Bowel Syndrome; Adult Medulloblastoma; Childhood Medulloblastoma; Anxiety Disorders; Medu…		AQP6	0	0	0	0	0	0	0	0	0	0	0	0	0	0	0	0
364	AQP7	1	0	0	0	0	0	0	0	1	0	2	4	0		AQP7	aquaporin 7	GO:0071918 urea transmembrane transport;GO:0015793 glycerol transport;GO:0015840 urea transport	GO:0005811 lipid droplet;GO:0016323 basolateral plasma membrane;GO:0009925 basal plasma membrane	GO:0015254 glycerol channel activity;GO:0015204 urea transmembrane transporter activity;GO:0015168 glycerol transmembrane transporter activity	This gene encodes a member of the aquaporin family of water-selective membrane channels. The encoded protein localizes to the plasma membrane and allows movement of water, glycerol and urea across cell membranes. This gene is highly expressed in the adipose tissue where the encoded protein facilitates efflux of glycerol. In the proximal straight tubules of kidney, the encoded protein is localized…	mammary_gland	(hsa04923)Regulation of lipolysis in adipocytes; (hsa03320)PPAR signaling pathway		Distribution: Detected in many; Specificity: Tissue enhanced	chr9:33402677-33383135	Transporters:Transporter channels and pores; Human disease related genes:Endocrine and metabolic diseases:Other endocrine and metabolic diseases; Predicted intracellular proteins		[GO:0005575] cellular_component; [GO:0008150] biological_process; [GO:0006810] transport; [GO:0055085] transmembrane transport; [GO:0022857] transmembrane transporter activity; [GO:0003674] molecular_function; [GO:0005622] intracellular anatomical structure; [GO:0005737] cytoplasm; [GO:0005886] plasma membrane; [GO:0031410] cytoplasmic vesicle; [GO:0043226] organelle; [GO:0005811] lipid droplet		GLYCEROL QUANTITATIVE TRAIT LOCUS; Pancreatic steatosis; Adult-onset obesity; Microvillus inclusion disease; Mental handicap; Albuminuria; Dystrophia myotonica 2; Pediatric Obesity; Obesity, Morbid; Follicular thyroid carcinoma; Hypoglycemia; Inflammation; Hyperlipidemia; Hyperinsulinism; Diarrhea; Acute Promyelocytic Leukemia; Liver Cirrhosis, Experimental; Fatty Liver; Metabolic Diseases; Polyc…		AQP7	0	0	0	0	0	0	0	0	0	0	0	0	0	0	0	0
367	AR	0	0	1	0	0	0	0	0	1	0	2	2	0		AR	androgen receptor	GO:0019102 male somatic sex determination;GO:0060520 activation of prostate induction by androgen receptor signaling pathway;GO:0018993 somatic sex determination	GO:0016607 nuclear speck;GO:0016604 nuclear body;GO:0000785 chromatin	GO:0070974 POU domain binding;GO:0005497 androgen binding;GO:0001091 RNA polymerase II general transcription initiation factor binding	The androgen receptor gene is more than 90 kb long and codes for a protein that has 3 major functional domains: the N-terminal domain, DNA-binding domain, and androgen-binding domain. The protein functions as a steroid-hormone activated transcription factor. Upon binding the hormone ligand, the receptor dissociates from accessory proteins, translocates into the nucleus, dimerizes, and then stimul…	mammary_gland;prostate	(hsa05215)Prostate cancer; (hsa04114)Oocyte meiosis; (hsa05207)Chemical carcinogenesis - receptor activation	antibody: Strong nuclear immunoreactivity was observed in nuclei of breast, epididymis and seminal vesicle. Nuclear staining of moderate intensity was also observed in skin, fallopian tube and endometrial stroma. Remaining normal tissues were negative.; Nuclear expression in several tissues, mainly in reproductive organs.	Distribution: Detected in many; Specificity: Tissue enhanced	chrX:67544021-67730619	FDA approved drug targets:Small molecule drugs; Cancer-related genes:Candidate cancer biomarkers; Predicted intracellular proteins; Human disease related genes:Cancers:Cancers of male genital organs; Cancer-related genes:Mutational cancer driver genes; Transcription factors:Zinc-coordinating DNA-binding domains; Disease related genes; Nuclear receptors; Human disease related genes:Congenital malf…	Cytosol (Supported)	[GO:0003674] molecular_function; [GO:0005575] cellular_component; [GO:0005622] intracellular anatomical structure; [GO:0043226] organelle; [GO:0005634] nucleus; [GO:0005737] cytoplasm; [GO:0043167] ion binding; [GO:0005829] cytosol; [GO:0008150] biological_process; [GO:0009058] biosynthetic process; [GO:0034641] cellular nitrogen compound metabolic process; [GO:0003677] DNA binding; [GO:0003700] …	HP:0012888:Abnormality of the uterine cervix; HP:0025486:Fused labia majora; HP:0012435:Ventral shortening of foreskin; HP:0008655:Aplasia/Hypoplasia of the fallopian tube; HP:0031102:Increased antimullerian hormone level; HP:0030346:Abnormal circulating follicle-stimulating hormone concentration; HP:0031102:Increased antimullerian hormone level; HP:0002550:Absent facial hair; HP:0100728:Germ cel…	ANDROGEN INSENSITIVITY, PARTIAL, WITH BREAST CANCER; Acinar cell cystadenoma; Atrophy, Muscular, Spinobulbar; Bulbospinal neuronopathy, X-linked recessive; Congenital hernia; Disorder of male reproductive system; Female Virilization; Genital Diseases, Male; Gonadal neoplasm; Hypospadias 1, X-Linked; Incomplete testicular feminization syndrome; Langerhans cell histiocytosis of skin; Nodulocystic a…	DOID:4674 androgen insensitivity syndrome;DOID:10892 hypospadias;DOID:0060161 Kennedy's disease;DOID:10283 prostate cancer	AR	0	0	0	0	0	0	0	0	0	0	0	0	0	0	0	0
368	ABCC6	0	0	1	0	0	0	0	0	1	0	2	2	0		ABCC6	ATP binding cassette subfamily C member 6	GO:0071716 leukotriene transport;GO:0030643 cellular phosphate ion homeostasis;GO:0072502 cellular trivalent inorganic anion homeostasis	GO:0016323 basolateral plasma membrane;GO:0009925 basal plasma membrane;GO:0045178 basal part of cell	GO:0015431 ABC-type glutathione S-conjugate transporter activity;GO:0043225 ATPase-coupled inorganic anion transmembrane transporter activity;GO:0140359 ABC-type transporter activity	The protein encoded by this gene is a member of the superfamily of ATP-binding cassette (ABC) transporters. ABC proteins transport various molecules across extra- and intra-cellular membranes. ABC genes are divided into seven distinct subfamilies (ABC1, MDR/TAP, MRP, ALD, OABP, GCN20, White). The encoded protein, a member of the MRP subfamily, is involved in multi-drug resistance. Mutations in th…	kidney	(hsa02010)ABC transporters		Distribution: Detected in many; Specificity: Tissue enriched	chr16:16223617-16149565	Human disease related genes:Cardiovascular diseases:Vascular diseases; Cancer-related genes:Candidate cancer biomarkers; ENZYME proteins; Human disease related genes:Congenital malformations:Congenital malformations of skin; Disease related genes; Potential drug targets; Enzymes; Transporters:Primary Active Transporters	Plasma membrane (Supported); Additional: Nucleoplasm	[GO:0005575] cellular_component; [GO:0003674] molecular_function; [GO:0043167] ion binding; [GO:0008150] biological_process; [GO:0006810] transport; [GO:0055085] transmembrane transport; [GO:0022857] transmembrane transporter activity; [GO:0016887] ATPase; [GO:0005622] intracellular anatomical structure; [GO:0005737] cytoplasm; [GO:0043226] organelle; [GO:0005783] endoplasmic reticulum; [GO:00056…	HP:0005297:Premature occlusive vascular stenosis; HP:0012409:Cortical nephrocalcinosis; HP:0003836:Stippled calcification of the shoulder; HP:0025533:Peau d'orange; HP:0003941:Stippled calcification of the elbow; HP:0006690:Myocardial calcification; HP:0000630:Abnormal retinal artery morphology; HP:0033026:White oral mucosal macule; HP:0012457:Medial calcification of medium-sized arteries; HP:001…	ARTERIAL CALCIFICATION, GENERALIZED, OF INFANCY, 2; Idiopathic arterial calcification of infancy; Medial calcification of medium-sized arteries; Peau d'orange retinal changes; Premature occlusive vascular stenosis; Pseudoxanthoma Elasticum, Heterozygous; Yellow papule; Arterial calcification; Medial calcification of large arteries; Abnormally lax or hyperextensible skin; Arterial calcification of…	DOID:0050644 arterial calcification of infancy;DOID:2738 pseudoxanthoma elasticum	ABCC6	0	0	0	0	0	0	0	0	0	0	0	0	0	0	0	0
372	ARCN1	0	0	0	0	0	0	1	0	1	1	3	7	0		ARCN1	archain 1	GO:0021691 cerebellar Purkinje cell layer maturation;GO:0021590 cerebellum maturation;GO:0021699 cerebellar cortex maturation	GO:0030126 COPI vesicle coat;GO:0030663 COPI-coated vesicle membrane;GO:0030137 COPI-coated vesicle	GO:0003723 RNA binding;GO:0003676 nucleic acid binding;GO:1901363 heterocyclic compound binding	This gene maps in a region, which include the mixed lineage leukemia and Friend leukemia virus integration 1 genes, where multiple disease-associated chromosome translocations occur. It is an intracellular protein. Archain sequences are well conserved among eukaryotes and this protein may play a fundamental role in eukaryotic cell biology. It has similarities to heat shock proteins and clathrin-a…			General cytoplasmic expression with a granular pattern, mainly in inflammatory tissues.; antibody: Most normal tissues displayed moderate to strong cytoplasmic positivity. Smooth and skeletal muscle were mainly negative.	Distribution: Detected in all; Specificity: Low tissue specificity	chr11:118572396-118603033	Human disease related genes:Congenital malformations:Other congenital malformations; Predicted intracellular proteins; Disease related genes	Vesicles (Supported); Additional: Cytosol;Golgi apparatus	[GO:0008150] biological_process; [GO:0006810] transport; [GO:0016192] vesicle-mediated transport; [GO:0005575] cellular_component; [GO:0005622] intracellular anatomical structure; [GO:0032991] protein-containing complex; [GO:0005737] cytoplasm; [GO:0031410] cytoplasmic vesicle; [GO:0043226] organelle; [GO:0005794] Golgi apparatus; [GO:0003674] molecular_function; [GO:0003723] RNA binding; [GO:001…	HP:0006429:Broad femoral neck; HP:0030799:Scaphocephaly; HP:0003016:Metaphyseal widening; HP:0002870:Obstructive sleep apnea; HP:0008905:Rhizomelia; HP:0000046:Scrotal hypoplasia; HP:0002673:Coxa valga; HP:0005616:Accelerated skeletal maturation; HP:0004691:2-3 toe syndactyly; HP:0006610:Wide intermamillary distance; HP:0000601:Hypotelorism; HP:0000483:Astigmatism; HP:0002066:Gait ataxia; HP:0000…	SHORT STATURE, RHIZOMELIC, WITH MICROCEPHALY, MICROGNATHIA, AND DEVELOPMENTAL DELAY; Ataxia, Motor; Tremor, Rubral; Ataxia, Sensory; Metaphyseal widening; Scaphycephaly; Hypoplasia of scrotum; Rhizomelia; Abnormal coordination; Advanced bone age; Ataxia, Truncal; Coxa valga; 2-3 toe syndactyly; Ataxia, Appendicular; Orbital separation diminished; Wide spaced nipples; Astigmatism; Multiple maligna…		ARCN1	0	0	0	0	0	0	0	1	0	0	0	0	0	0	0	0
374	AREG	0	1	1	0	0	0	0	0	1	1	4	5	0		AREG	amphiregulin	GO:0060598 dichotomous subdivision of terminal units involved in mammary gland duct morphogenesis;GO:0060751 branch elongation involved in mammary gland duct branching;GO:0042695 thelarche	GO:0012507 ER to Golgi transport vesicle membrane;GO:0030669 clathrin-coated endocytic vesicle membrane;GO:0033116 endoplasmic reticulum-Golgi intermediate compartment membrane	GO:0005154 epidermal growth factor receptor binding;GO:0070851 growth factor receptor binding;GO:0008083 growth factor activity	The protein encoded by this gene is a member of the epidermal growth factor family. It is an autocrine growth factor as well as a mitogen for astrocytes, Schwann cells and fibroblasts. It is related to epidermal growth factor (EGF) and transforming growth factor alpha (TGF-alpha). The protein interacts with the EGF/TGF-alpha receptor to promote the growth of normal epithelial cells, and it inhibi…	liver;stomach	(hsa04012)ErbB signaling pathway; (hsa05210)Colorectal cancer; (hsa04390)Hippo signaling pathway	Cytoplasmic expression in placenta.; antibody: Cytotrophoblastic cells in placenta showed strong membranous positivity. Peripheral nerves, fibroblasts and a large subset of hematopoietic cells displayed moderate cytoplasmic immunoreactivity. A majority of remaining cell types were weakly stained or negative.	Distribution: Detected in many; Specificity: Tissue enhanced	chr4:74445136-74455005	Human disease related genes:Cancers:Cancers of the digestive system; Cancer-related genes:Candidate cancer biomarkers	Mitochondria (Approved)	[GO:0003674] molecular_function; [GO:0005575] cellular_component; [GO:0005576] extracellular region; [GO:0005615] extracellular space; [GO:0005622] intracellular anatomical structure; [GO:0005737] cytoplasm; [GO:0043226] organelle; [GO:0005783] endoplasmic reticulum; [GO:0008150] biological_process; [GO:0008283] cell population proliferation; [GO:0007267] cell-cell signaling; [GO:0031410] cytopla…		Papillary carcinoma of the breast; Mucous membrane hyperplasia; Ferrochelatase deficiency; Cytomegaloviral colitis; Eosinophilic bronchitis; PALMOPLANTAR KERATODERMA, NONEPIDERMOLYTIC; Head and neck cancer metastatic; Keratoderma, Palmoplantar, Diffuse; Erythropoietic Protoporphyria; Head Neoplasms; Upper Aerodigestive Tract Neoplasms; Cancer of Neck; Humoral hypercalcemia of malignancy (disorder…		AREG	0	0	0	0	0	0	0	0	0	0	0	0	0	0	0	0
[truncated: 8,421 more rows]
[truncated: 211 more columns]

## Sheet: SuppTable_7
Go to ––> _listAllTables
Supplementary Table 7.	Enrichment results from gProfiler using as input list of genes under selection in at least one branch per group. Screen was performed with 115 mammals.
	term_size:	The number of genes that are annotated to the term.
	query_size:	The number of genes that were included in the query.
	intersection_size:	The number of genes in the query that are annotated to the corresponding term.
	precision:	The proportion of genes in the input list that are annotated to the function. Defined as intersection_size/query_size.
	recall:	The proportion of functionally annotated genes that the query recovers. Defined as intersection_size/term_size.
	effective_domain_size:	The total number of genes "in the universe " which is used as one of the four parameters for the hypergeometric probability function of statistical significance.
[truncated: 2,721 more rows]

## Sheet: SuppTable_8
Go to ––> _listAllTables
[truncated: 233 more rows]

## Sheet: SuppTable_9
Go to ––> _listAllTables
[truncated: 8 more rows]

[truncated: 9 more sheets: SuppTable_10, SuppTable_11, SuppTable_12, SuppTable_13, SuppTable_14, SuppTable_15, SuppTable_16, SuppTable_17, SuppTable_18]
